# Supplementary material
Source: Research Square preprint supplement (doi:10.21203/rs.3.rs-9024544/v1)
Supplement: Supplementary file 1 [file a5a0f41db2b64c360208153d.docx]

**Supplementary Materials**

**Supplement-Table S1 to 25**

Table S1:ICD-10 Codes for each chronic disease.

Table S2. field IDs for UK Biobank variables other than disease used in this study.

Table S3: Baseline characteristicsin UK Biobank.

Data are presented as n, mean±SD or n (%), unless otherwise stated.PhenoAgeAccel: phenotypic age acceleration; BMI: body mass index.

Table S4:Compositional data for phenotypic age at baseline.

Data are presented as n, mean±SD or n (%), unless otherwise stated.

**Table S5: Probability of an event and mortality per 1000 person-years across subgroups in people with or without major chronic diseases from UK Biobank and people with major chronic diseases from Chinese Cohort, stratified by different aging subgroups.**

Table S6. PhenoAgeAccel of participants stratified by lifestyle factors in the UK Biobank.

PhenoAgeAccel: phenotypic age acceleration; BMI: body mass index.

Table S7: Association between PhenoAgeAccel phenotype and risk of major chronic diseasesin UK Biobank .

Model 0 not adjusted.

Model 1 analysis for sex and BMI.

Model 2 analysis further adjusted for smoking status, sleep duration, and education.

Model 3 analysis further adjusted for walking speed, employment status, and average household income.

**Table S8 : Association between PhenoAgeAccel and mortality in participants with or without major chronic diseases.**

Cox proportional hazards models adjusted for gender (male, female), BMI (underweight and normal/overweight and obese), smoking status (current/former and never smoked), education (college degree/non-college degree), employment status (In paid employment or self-employed/Not in paid), walking speed (normal speed and fast walking/slow walking), average household income (≥31, 000/<31, 000), and sleep duration (≤6h/≥7h) for UK Biobank.

Table S9: Mediating effects of PhenoAgeAccel on the relationship between current smoking, slow walking speed, employment status, lower average household income and mortality in participants with or without major chronic diseases.

Table S10: Estimated and prolonged life expectancy at age 45 and 65 for participants with and without major chronic diseases after adding some covariates for control (n=353619).

The Royston–Parmar proportion-hazards survival model adjusted for gender (male, female), BMI (underweight and normal/overweight and obese), smoking status (current/former and never smoked), employment status (In paid employment or self-employed/Not in paid), walking speed (normal speed and fast walking/slow walking), and sleep duration (≤6h/≥7h) for UK Biobank.

Table S11: Estimated value, prolonged value, and average gain of life expectancy related to aging changes at age 45, and estimated value and prolonged value of life expectancy related to aging changes at age 65 in participants with/without major chronic diseases from UK Biobank and participants with major chronic diseases from Chinese Cohort, across different aging subgroups.

Table S12: Death rates per 1,000 person-years, hazard ratios, estimated and prolonged life expectancy at age 45 and 65 for participants with and without major chronic diseases from UK Biobank and participants with major chronic diseases from Chinese Cohort, in different age subgroups (subgrouped by chronological age at 60 years of age)

Cox proportional hazards models adjusted for gender (male, female), BMI (underweight and normal/overweight and obese), smoking status (current/former and never smoked), education (college degree/non-college degree), employment status (In paid employment or self-employed/Not in paid), walking speed (normal speed and fast walking/slow walking), average household income (≥31, 000/<31, 000), and sleep duration (≤6h/≥7h) for UK Biobank.

Table S13: Death rates per 1,000 person-years, hazard ratios, estimated and prolonged life expectancy at age 45 and 65 for participants with and without major chronic diseases (excluding CVD) from UK Biobank and participants with major chronic diseases (excluding CVD) from Chinese Cohort.

Cox proportional hazards models: adjusted for gender (male, female), BMI (underweight and normal/overweight and obese), smoking status (current/former and never smoked), education (college degree/non-college degree), employment status (in paid employment or self-employed/not in paid), walking speed (normal speed and fast walking/slow walking), average household income (≥31,000/<31,000), and sleep duration (≤6h/≥7h) for UK Biobank; only adjusted for gender (male, female) for Chinese Cohort.

Table S14: Death rates per 1,000 person-years, hazard ratios, estimated and prolonged life expectancy at age 45 and 65 for participants with and without major chronic diseases (excluding diabetes) from UK Biobank and participants with major chronic diseases (excluding diabetes) from Chinese Cohort.

Cox proportional hazards models: adjusted for gender (male, female), BMI (underweight and normal/overweight and obese), smoking status (current/former and never smoked), education (college degree/non-college degree), employment status (in paid employment or self-employed/not in paid), walking speed (normal speed and fast walking/slow walking), average household income (≥31,000/<31,000), and sleep duration (≤6h/≥7h) for UK Biobank; only adjusted for gender (male, female) for Chinese Cohort.

Table S15: Death rates per 1,000 person-years, hazard ratios, estimated and prolonged life expectancy at age 45 and 65 for participants with and without major chronic diseases (excluding respiratory diseases) from UK Biobank and participants with major chronic diseases (excluding respiratory diseases) from Chinese Cohort.

Cox proportional hazards models: adjusted for gender (male, female), BMI (underweight and normal/overweight and obese), smoking status (current/former and never smoked), education (college degree/non-college degree), employment status (in paid employment or self-employed/not in paid), walking speed (normal speed and fast walking/slow walking), average household income (≥31,000/<31,000), and sleep duration (≤6h/≥7h) for UK Biobank; only adjusted for gender (male, female) for Chinese Cohort.

Table S16: Death rates per 1,000 person-years, hazard ratios, estimated and prolonged life expectancy at age 45 and 65 for participants with and without major chronic diseases (excluding cancer) from UK Biobank and participants with major chronic diseases (excluding cancer) from Chinese Cohort.

Cox proportional hazards models: adjusted for gender (male, female), BMI (underweight and normal/overweight and obese), smoking status (current/former and never smoked), education (college degree/non-college degree), employment status (in paid employment or self-employed/not in paid), walking speed (normal speed and fast walking/slow walking), average household income (≥31,000/<31,000), and sleep duration (≤6h/≥7h) for UK Biobank; only adjusted for gender (male, female) for Chinese Cohort.

Table S17: Death rates per 1,000 person-years, hazard ratios, estimated and prolonged life expectancy at age 45 and 65 for participants with and without major chronic diseases (excluding dementia) from UK Biobank and participants with major chronic diseases (excluding dementia) from Chinese Cohort.

Cox proportional hazards models: adjusted for gender (male, female), BMI (underweight and normal/overweight and obese), smoking status (current/former and never smoked), education (college degree/non-college degree), employment status (in paid employment or self-employed/not in paid), walking speed (normal speed and fast walking/slow walking), average household income (≥31,000/<31,000), and sleep duration (≤6h/≥7h) for UK Biobank; only adjusted for gender (male, female) for Chinese Cohort.

Table S18: Death rates per 1,000 person-years, hazard ratios, estimated and prolonged life expectancy at age 45 and 65 for participants with and without major chronic diseases from UK Biobank and participants with major chronic diseases from Chinese Cohort, after removal of participants with hypertension, cerebrovascular disease, and mental disorders at baseline.

Cox proportional hazards models: adjusted for gender (male, female), BMI (underweight and normal/overweight and obese), smoking status (current/former and never smoked), education (college degree/non-college degree), employment status (in paid employment or self-employed/not in paid), walking speed (normal speed and fast walking/slow walking), average household income (≥31,000/<31,000), and sleep duration (≤6h/≥7h) for UK Biobank; only adjusted for gender (male, female) for Chinese Cohort.

Table S19: Death rates per 1,000 person-years, hazard ratios, estimated and prolonged life expectancy at age 45 and 65 for participants with and without major chronic diseases from UK Biobank and participants with major chronic diseases from Chinese Cohort, after excluding participants who died in the first year of follow-up.

Cox proportional hazards models: adjusted for gender (male, female), BMI (underweight and normal/overweight and obese), smoking status (current/former and never smoked), education (college degree/non-college degree), employment status (in paid employment or self-employed/not in paid), walking speed (normal speed and fast walking/slow walking), average household income (≥31,000/<31,000), and sleep duration (≤6h/≥7h) for UK Biobank; only adjusted for gender (male, female) for Chinese Cohort.

**Table S20: Death rates per 1,000 person-years, hazard ratios, estimated and prolonged life expectancy at age 45 and 65 for participants with and without major chronic diseases from UK Biobank and participants with major chronic diseases from Chinese Cohort, after shortening the follow-up period to 15.0 years for UK Biobank and 10.0 years for Chinese Cohort.**

Cox proportional hazards models: adjusted for gender (male, female), BMI (underweight and normal/overweight and obese), smoking status (current/former and never smoked), education (college degree/non-college degree), employment status (in paid employment or self-employed/not in paid), walking speed (normal speed and fast walking/slow walking), average household income (≥31,000/<31,000), and sleep duration (≤6h/≥7h) for UK Biobank; only adjusted for gender (male, female) for Chinese Cohort.

Table S21: Death rates per 1,000 person-years, hazard ratios, estimated and prolonged life expectancy at age 45 and 65 for participants with and without major chronic diseases from UK Biobank after removal of missing covariate data.

Cox proportional hazards models adjusted for gender (male, female), BMI (underweight and normal/overweight and obese), smoking status (current/former and never smoked), education (college degree/non-college degree), employment status (In paid employment or self-employed/Not in paid), walking speed (normal speed and fast walking/slow walking), average household income (≥31, 000/<31, 000), and sleep duration (≤6h/≥7h) for UK Biobank.

Table S22: Death rates per 1,000 person-years, hazard ratios, estimated and prolonged life expectancy at age 45 and 65 for participants with and without major chronic diseases from UK Biobank after filling in missing aging data.

Cox proportional hazards models adjusted for gender (male, female), BMI (underweight and normal/overweight and obese), smoking status (current/former and never smoked), education (college degree/non-college degree), employment status (In paid employment or self-employed/Not in paid), walking speed (normal speed and fast walking/slow walking), average household income (≥31, 000/<31, 000), and sleep duration (≤6h/≥7h) for UK Biobank.

Table S23: PhenoAgeAccel values across Waves in distinct k-means clusters of PhenoAgeAccel trajectories, for participants from the Chinese Cohort included in the focused analysis.

Table S24: Death rates per 1,000 person-years, hazard ratios, and estimated as well as prolonged life expectancy at 45 and 65 years of age across distinct k-means clusters of PhenoAgeAccel trajectories, for participants from the Chinese Cohort included in the focused analysis.

Cox proportional hazards models for the Chinese Cohort included in the focused analysis.

Table S25: Death rates per 1,000 person-years, hazard ratios, and estimated as well as prolonged life expectancy at 45 and 65 years of age across tertile groups of cuPhenoAgeAccel, for participants from the Chinese Cohort included in the focused analysis.

Cox proportional hazards models for the Chinese Cohort included in the focused analysis.

**Supplement-Figure S1 to 22**

**Figure S1: Distribution of PhenoAgeAccel across different disease states in UK Biobank (participants with and without major chronic diseases) and Chinese Cohort (participants with major chronic diseases).**

A: With major chronic diseases (UK Biobank)

B: Without major chronic diseases (UK Biobank)

C: With major chronic diseases (Chinese Cohort)

Figure S2: Association between mortality and different PhenoAgeAccel phenotypes in participants with and without major chronic diseases from UK Biobank and participants with major chronic diseases from Chinese Cohort.

A: With major chronic diseases (UK Biobank)

B: Without major chronic diseases (UK Biobank)

C: With major chronic diseases (Chinese Cohort)

Figure S3: Predicted increase in PhenoAgeAccel for each disease count by age category in UK Biobank. The y-axis depicts the increase in PhenoAgeAccel compared to persons who were disease-free. The x-axis shows groups categorized based on chronological age and the number of diseases each participant had.

Figure S4: Standardized cumulative survival of participants with different PhenoAgeAccel phenotypes from UK Biobank (with and without major chronic diseases) and Chinese Cohort (with major chronic diseases).

A, B, C: With major chronic diseases (UK Biobank)

D, E, F: Without major chronic diseases (UK Biobank)

G, H, I: With major chronic diseases (Chinese Cohort)

Figure S5: Linear and nonlinear relationships between phenotypic age acceleration (PhenoAgeAccel) and risk of death in patients with and without major chronic diseases in UK Biobank.

Adjusted for gender (male, female), BMI (underweight and normal/overweight and obese), smoking status (current/former and never smoked), education (college degree/non-college degree), employment status (In paid employment or self-employed/Not in paid), walking speed (normal speed and fast walking/slow walking), average household income (≥31, 000/<31, 000), and sleep duration (≤6h/≥7h) for UK Biobank.

Figure S6:Estimated life expectancy at age 45 for participants with and without major chronic diseases from UK Biobank and participants with major chronic diseases from Chinese Cohort.

A, B, C: With major chronic diseases (UK Biobank)

D, E, F: Without major chronic diseases (UK Biobank)

G, H, I: With major chronic diseases (Chinese Cohort)

Figure S7:Association between increased life expectancy at age 45 and different phenotypes of PhenoAgeAccel in participants with and without major chronic diseases from UK Biobank after adding some covariates for control (n=353619).

A, B, C:with major chronic diseases

D, E, F:without major chronic diseases

The Royston–Parmar proportion-hazards survival model adjusted for gender (male, female), BMI (underweight and normal/overweight and obese), smoking status (current/former and never smoked), employment status (In paid employment or self-employed/Not in paid), walking speed (normal speed and fast walking/slow walking), and sleep duration (≤6h/≥7h) for UK Biobank.

Figure S8: Estimated life expectancy at age 45 for participants with and without major chronic diseases from UK Biobank and participants with major chronic diseases from Chinese Cohort in different aging subgroups.

Figure S9: Association between prolonged life expectancy at age 45 years and different PhenoAgeAccel phenotypes in participants with and without major chronic diseases in different PhenoAgeAccel classification.

A, D, G:Binary classification

B, E, H: Tertile classification

C, F, I:Quartile classification

Figure S10: **The estimates of life expectancy at age 45 by sex, smoking status, employment status, BMI, average household income, sleep duration, education and walking speed in UK Biobank.**

Figure S11: Trends in PhenoAge as a function of chronological age in UK Biobank (participants with and without major chronic diseases) and Chinese Cohort (participants with major chronic diseases)

The red line depicts the expected PhenoAge for each chronological age, with points above the line depicting people who were phenotypically older than expected, and points below the line depicting those who were phenotypically younger than expected.

A: With major chronic diseases (UK Biobank)

B: Without major chronic diseases (UK Biobank)

C: With major chronic diseases (Chinese Cohort)

**Figure S12: Association between increased life expectancy at age 45 years and different PhenoAgeAccel phenotypes in participants with and without major chronic diseases from UK Biobank and participants with major chronic diseases from Chinese Cohort, across different age subgroups.**

A, B, C Chronological age ≥ 60

D, E, F:Chronological age < 60

Figure S13: Association between increased life expectancy at age 45 years and different PhenoAgeAccel phenotypes in participants with and without major chronic diseases (excluding one disease) from UK Biobank and participants with major chronic diseases from Chinese Cohort.

**Figure S14: Association between increased life expectancy at age 45 years and different PhenoAgeAccel phenotypes, after removal of participants with hypertension, cerebrovascular disease, and mental disorders at baseline, in participants with and without major chronic diseases from UK Biobank(n=207262) and participants with major chronic diseases from Chinese Cohort(n=231551).**

A: With major chronic diseases (UK Biobank)

B: Without major chronic diseases (UK Biobank)

C: With major chronic diseases (Chinese Cohort)

Figure S15: Association between increased life expectancy at age 45 years and different PhenoAgeAccel phenotypes, after excluding participants who died in the first year of follow-up, in participants with and without major chronic diseases from UK Biobank(n=354672) and participants with major chronic diseases from Chinese Cohort(n=332895).

A: With major chronic diseases (UK Biobank)

B: Without major chronic diseases (UK Biobank)

C: With major chronic diseases (Chinese Cohort)

Figure S16:Association between increased life expectancy at age 45 and different phenotypes of PhenoAgeAccel, after shortening the follow-up period to 15.0 years (UK Biobank, n=153806) and 10.0 years (Chinese Cohort, n=248884), in participants with and without major chronic diseases from UK Biobank and participants with major chronic diseases from Chinese Cohort.

A: With major chronic diseases (UK Biobank)

B: Without major chronic diseases (UK Biobank)

C: With major chronic diseases (Chinese Cohort)

Figure S17:Association between increased life expectancy at age 45 years and different PhenoAgeAccel phenotypes in participants with and without major chronic diseases from UK Biobank after removal of missing covariate data(n=255816).

**Figure S18: Association between increased life expectancy at age 45 years and different PhenoAgeAccel phenotypes in participants with and without major chronic diseases from UK Biobank after filling in missing aging data (n=369781).**

Figure S19 : Life expectancy at 45 and 65 years of age across distinct k-means clusters of PhenoAgeAccel trajectories, as well as the association between years of life gained in life expectancy at 45 years and these different k-means clusters, in participants from the Chinese Cohort included in the focused analysis (n=16991).

A-C: Bar plots illustrating life expectancy at 45 years and 65 years across three PhenoAgeAccel trajectory patterns (high-stability, moderate-stability, low-stability) in total participants (A), men (B), and women (C).

D-F: Curves depicting years of life gained across ages (45–100 years) for the comparisons of high-stability vs low-stability and moderate-stability vs low-stability in total participants (D), men (E), and women (F)

Figure S20 :Life expectancy at 45 and 65 years of age across tertile groups of cuPhenoAgeAccel, as well as the association between years of life gained in life expectancy at 45 years and these cuPhenoAgeAccel tertile groups, in participants from the Chinese Cohort included in the focused analysis (n=16,991).

A-C: Curves depicting years of life gained across ages (45–100 years) for the comparisons of cuPhenoAgeAccel Tertile 1 (lowest cuPhenoAgeAccel) vs. Tertile 3 (highest cuPhenoAgeAccel) and Tertile 2 (moderate cuPhenoAgeAccel) vs. Tertile 3 (highest cuPhenoAgeAccel) in total participants (A), men (B), and women (C).

D-F: Bar plots illustrating life expectancy at 45 years and 65 years across three cuPhenoAgeAccel tertile groups (Tertile 1: lowest; Tertile 2: moderate; Tertile 3: highest) in total participants (D), men (E), and women (F).

**Figure S21：The webpage interface of the PhenoAgeAccel-mortality-lifespan model.**

The baseline characteristics can be input through the operation bar on the left, and the display area on the right presents the degree of phenotypic aging in the form of a dashboard. The curve graph shows the changes in the expected lifespan gain as people age

**Figure S22: Clinical performance of the PhenoLife-M platform for mortality risk stratification and prediction.**

(A) Distribution of PhenoAge acceleration (PhenoAgeAccel) in alive and deceased patients. The orange boxplot represents deceased patients (n=10), and the blue violin plot represents alive patients (n=2779). P < 0.001 by Mann-Whitney U test.(B) Mortality rate across different PhenoAge acceleration groups. The red, orange, and blue bars represent severe accelerated aging (n=603), mild accelerated aging (n=493), and non-accelerated aging (n=1693) groups, respectively. The relative risk (RR) of mortality in the severe accelerated group compared to the non-accelerated group was 19.7.(C) Distribution of aging level rank in alive and deceased patients. The orange dots represent deceased patients (n=10), and the blue violin plot represents alive patients (n=2779). P < 0.001 by Mann-Whitney U test.(D) ROC curve of aging level rank for predicting mortality. The orange step curve represents the ROC performance, and the blue dashed line represents the chance line. The area under the curve (AUC) was 0.82 (95% CI: 0.71–0.93).

Table 1: Estimated value, prolonged value, and average gain of life expectancy related to aging changes at age 45, and estimated value and prolonged value of life expectancy related to aging changes at age 65 in participants with/without major chronic diseases from UK Biobank and participants with major chronic diseases from Chinese Cohort.

|  | **UK Biobank** | | | | | | | | **Chinese Cohort** | | |
| --- | --- | --- | --- | --- | --- | --- | --- | --- | --- | --- | --- |
|  | **With Major chronic diseases** | | | | **Without Major chronic diseases** | | | | **With Major chronic diseases** | | |
|  | **Total** | **Man** | **Woman** | **Total** | | **Man** | **Woman** | **Total** | | **Man** | **Woman** |
|  | (n=200511) | (n=100447) | (n=100065) | (n=153108) | | (n=63093) | (n=90018) | (n=307329) | | (n=149998) | (n=157333) |
| **Events/total, %** |  |  |  |  | |  |  |  | |  |  |
| Severe accelerated aging | 10340/52037(19.9) | 6978/29464(23.7) | 3362/22573(14.9) | 386/27073(1.4) | | 256/12136(2.1) | 130/14937(0.9) | 7257/57603(12.6) | | 4126/31292(13.2) | 3132/26311(11.9) |
| Mild accelerated aging | 6362/46346(13.7) | 3993/25553(15.6) | 2369/20793(11.4) | 364/33294(1.1) | | 220/15899(1.4) | 144/17395(0.8) | 6321/57603(11.0) | | 3566/31292(11.4) | 2754/26311(10.5) |
| Non-accelerated aging | 11173/102128(10.9) | 5588/45429(12.3) | 5585/56699(9.9) | 700/92741(0.8) | | 331/35055(0.9) | 369/57686(0.6) | 8235/192123(4.3) | | 4554/87412(5.2) | 3681/104711(3.5) |
| **Life expectancy, 45 y** |  |  |  |  | |  |  |  | |  |  |
| Severe accelerated aging | 39.11(38.80, 39.42) | 37.73(37.33, 38.13) | 41.39(40.90, 41.87) | 50.99(50.30, 51.67) | | 50.53(49.63, 51.43) | 51.68(50.69, 52.67) | 42.14(41.87, 42.42) | | 41.01(40.63, 41.40) | 43.65(43.27, 44.02) |
| Mild accelerated aging | 43.06(42.75, 43.38) | 42.00(41.58, 42. 43) | 44.48(44.01, 44.94) | 51.99(51.45, 52.53) | | 51.92(51.24, 52.59) | 52.19(51.35, 53.03) | 43.07(42.80, 43.34) | | 41.92(41.54, 42.30) | 44.53(44.17, 44.90) |
| Non-accelerated aging | 45.05(44.80, 45.31) | 43.93(43.57, 44.30) | 45.93(45.57, 46.29) | 52.94(52.57, 53.30) | | 52.77(52.28, 53.25) | 52.96(52.37, 53.55) | 46.02(45.83, 46.21) | | 44.06(43.76, 44.36) | 47.60(47.36, 47.85) |
| **Years of life gained, 45 y** |  |  |  |  | |  |  |  | |  |  |
| Severe accelerated aging | Reference | Reference | Reference | Reference | | Reference | Reference | Reference | | Reference | Reference |
| Mild accelerated aging | 3.95(3.51, 4.39) | 4.27(3.69, 4.85) | 3.09(2.41, 3.76) | 1.00(0.13, 1.87) | | 1.38(0.26, 2.51) | 0.51(-0.79, 1.81) | 0.92(0.54, 1.31) | | 0.91(0.37, 1.45) | 0.89(0.36, 1.41) |
| Non-accelerated aging | 5.94(5.54, 6.35) | 6.20(5.66, 6.74) | 4.54(3.94, 5.14) | 1.95(1.18, 2.72) | | 2.23(1.21, 3.26) | 1.28(0.13, 2.43) | 3.87(3.54, 4.21) | | 3.04(2.56, 3.53) | 3.95(3.50, 4.40) |
| **Life expectancy, 65 y** |  |  |  |  | |  |  |  | |  |  |
| Severe accelerated aging | 21.73(21.47,22.00) | 20.51(20.19,20.84) | 23.77(23.35,24.18) | 31.34(30.68,31.99) | | 31.08(30.23,31.93) | 31.87(30.90,32.83) | 24.94(24.74, 25.13) | | 24.23(23.96, 24.50) | 25.79(25.52, 26.07) |
| Mild accelerated aging | 24.98(24.71,25.26) | 24.03(23.67,24.39) | 26.29(25.89,26.69) | 32.25(31.73,32.77) | | 32.29(31.65,32.93) | 32.35(31.52,33.17) | 25.66(25.47, 25.86) | | 24.93(24.66, 25.21) | 26.51(26.24, 26.79) |
| Non-accelerated aging | 26.64(26.42,26.87) | 25.64(25.32,25.96) | 27.48(27.17,27.80) | 33.11(32.76,33.46) | | 33.04(32.57,33.50) | 33.07(32.49,33.65) | 27.98(27.83, 28.14) | | 26.59(26.34, 26.83) | 29.01(28.81, 29.21) |
| **Years of life gained, 65 y** |  |  |  |  | |  |  |  | |  |  |
| Severe accelerated aging | Reference | Reference | Reference | Reference | | Reference | Reference | Reference | | Reference | Reference |
| Mild accelerated aging | 3.25(2.87, 3.63) | 3.52(3.03, 4.00) | 2.52(1.94, 3.10) | 0.91(0.07, 1.75) | | 1.21(0.14, 2.27) | 0.48(-0.79, 1.75) | 0.73(0.45, 1.00) | | 0.70(0.32, 1.09) | 0.72(0.33, 1.11) |
| Non-accelerated aging | 4.91(4.56, 5.25) | 5.13(4.67, 5.58) | 3.72(3.19, 4.24) | 1.77(1.03, 2.52) | | 1.95(0.98, 2.92) | 1.20(0.08, 2.33) | 3.05(2.80, 3.29) | | 2.36(1.99, 2.72) | 3.21(2.87, 3.56) |
| **Years of life lost between adjacent groups, 45 y** |  |  |  |  | |  |  |  | |  |  |
| Mild accelerated aging vs Severe accelerated aging | 3.95(3.51, 4.39) | 4.27(3.69, 4.85) | 3.09(2.41, 3.76 | 1.00(0.13, 1.87) | | 1.38(0.26, 2.51) | 0.51(-0.79, 1.81) | 2.95(2.62, 3.28) | | 2.14(1.65, 2.62) | 3.07(2.63, 3.51) |


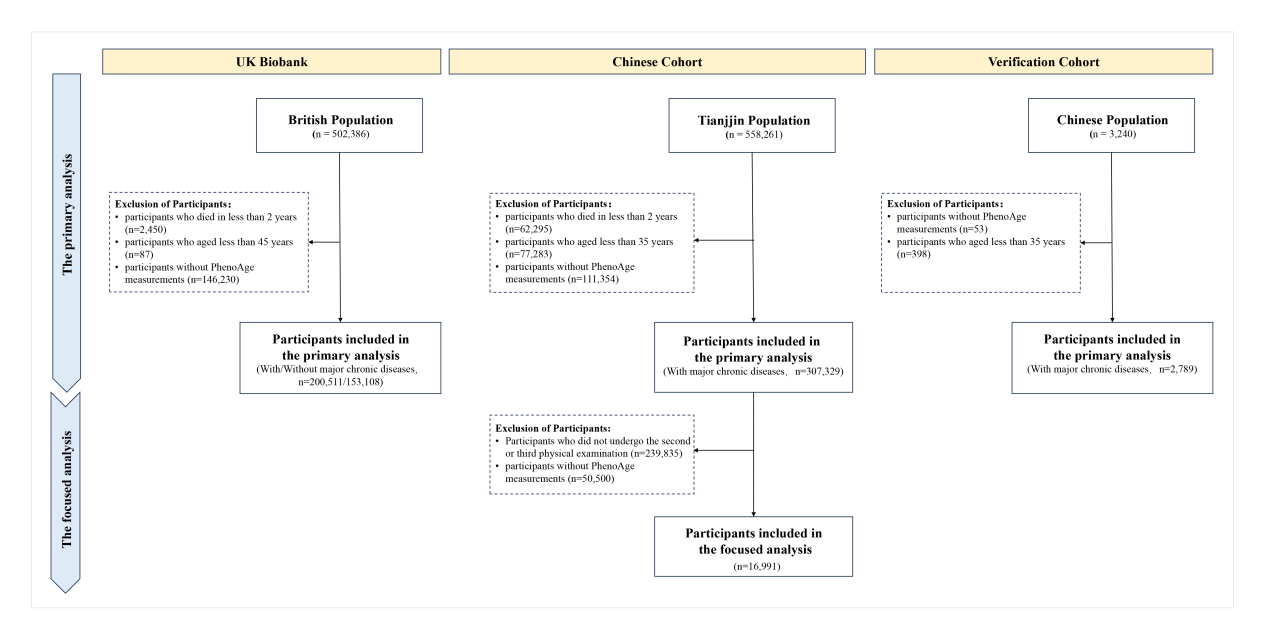


Figure 1:Processing workflow. PhenoAgeAccel:phenotypic age acceleration.


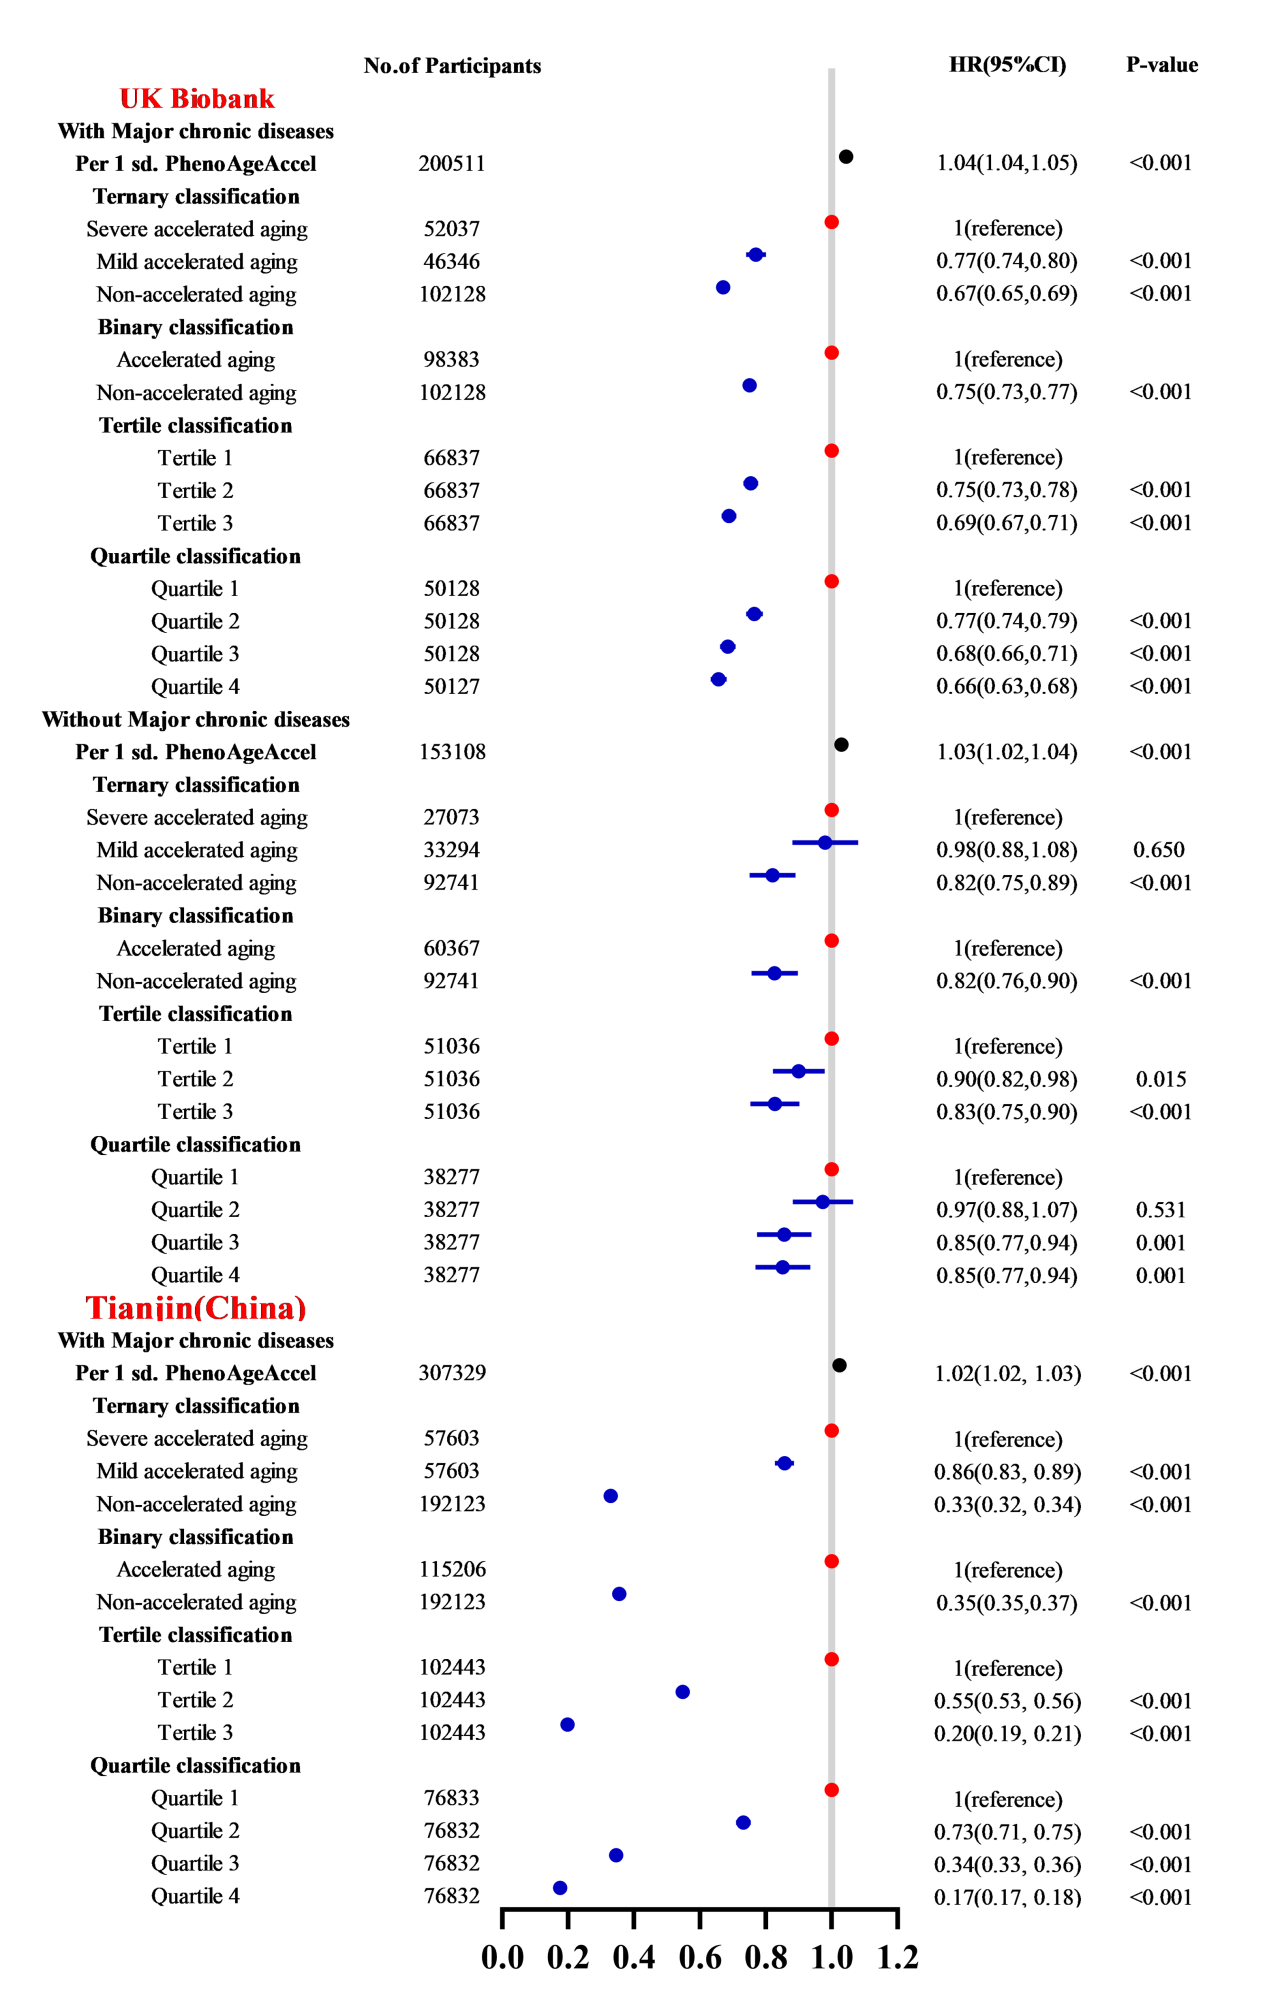


Figure 2: Association between PhenoAgeAccel and mortality in people with or without major chronic diseases from UK Biobank and participants with major chronic diseases from Chinese Cohort.

Cox proportional hazards models: adjusted for gender (male, female), BMI (underweight and normal/overweight and obese), smoking status (current/former and never smoked), education (college degree/non-college degree), employment status (in paid employment or self-employed/not in paid), walking speed (normal speed and fast walking/slow walking), average household income (≥31,000/<31,000), and sleep duration (≤6h/≥7h) for UK Biobank; only adjusted for gender (male, female) for Chinese Cohort.


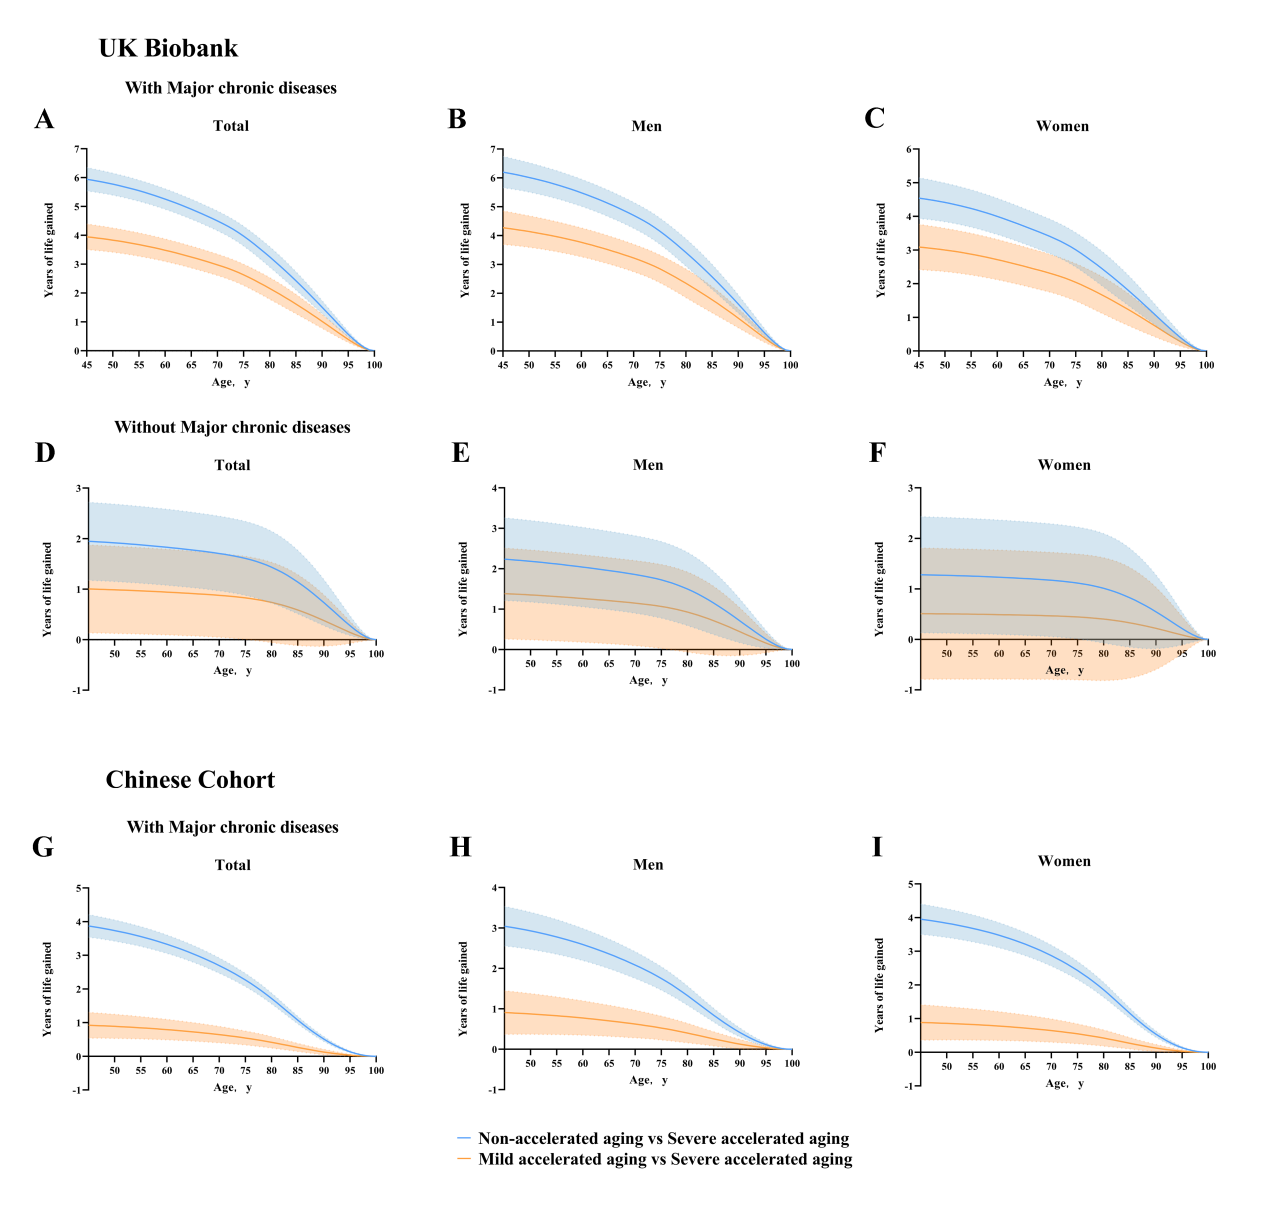


Figure 3:Life year gains (95% CI) associated with mild accelerated aging and non-accelerated aging when compared to the severe accelerated aging group for participants with and without major chronic diseases from UK Biobank and participants with major chronic diseases from Chinese Cohort.

A, B, C: With major chronic diseases (UK Biobank)

D, E, F: Without major chronic diseases (UK Biobank)

G, H, I: With major chronic diseases (Chinese Cohort)


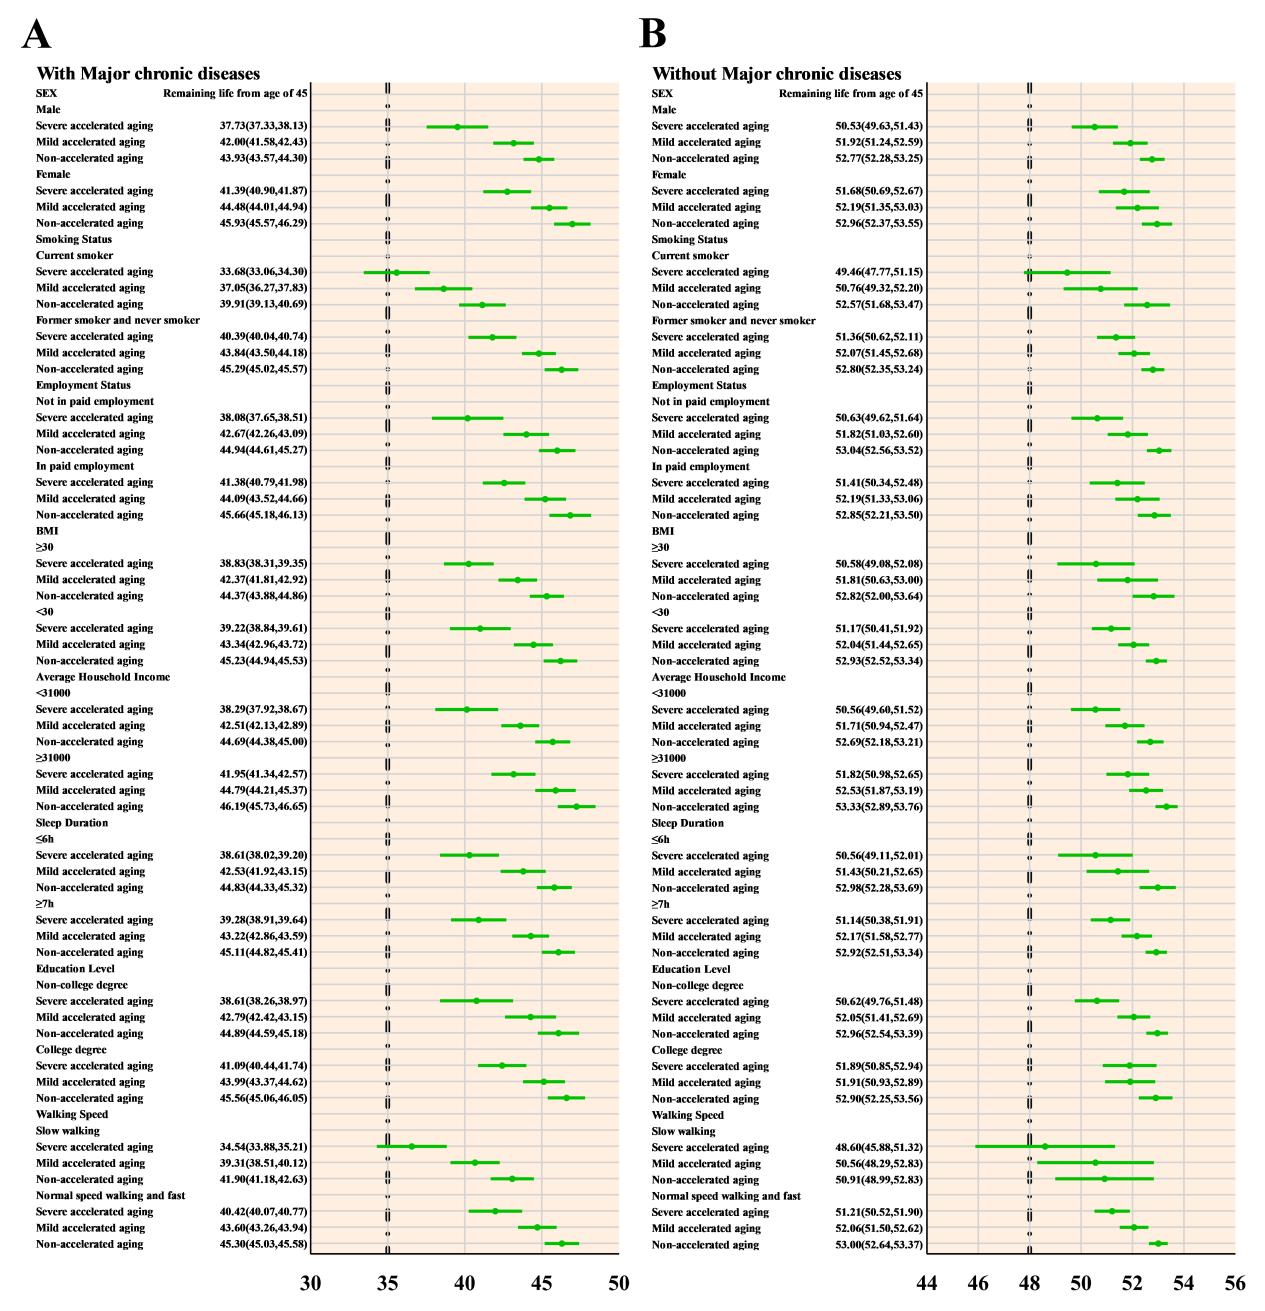


**Figure 4:Subgroup analyses of The estimates of life expectancy at age 45 among participants with or without major chronic diseases from UK Biobank by PhenoAgeAccel category.**

A: Remaining life expectancy from age 45 among participants with major chronic diseases.

B: Remaining life expectancy from age 45 among participants without major chronic diseases.

The green circles represent the point estimates of remaining life expectancy, and the green horizontal bars represent the 95% confidence intervals. Subgroups are stratified by sex, smoking status, employment status, BMI, average household income, sleep duration, education level, and walking speed, and further categorized by PhenoAge acceleration status (severe accelerated aging, mild accelerated aging, non-accelerated aging).

Table S1:ICD-10 Codes for each chronic disease.

| **Major chronic disease** | **ICD-10 codes** |
| --- | --- |
| Cardiovascular Disease | I11.0, I13.0, I13.2, I50.X for heart failure |
| I20-I25 for coronary heart disease |
| I26 for pulmonary embolism |
| I10-I15, O10, T46.5, Y52.5 for hypertension |
| I42 for Cardiomyopathy |
| I48 for atrial fibrillation |
| I73 for peripheral arterial disease |
| I80-I82 for pulmonary vascular thrombosis |
| Diabetes | E10-16, G59.0, G63.2, H28.0, H36.0, M14.2, N08.3, O24.X, T38.3, Y42.3 |
| Cancer | C00-C97, except for C44 (non-melanoma skin cancer), D01.0, D02.0, D09.0 |
| Dementia | F00-F04, F051, G30 |
| Respiratory Diseases | I26 for pulmonary embolism |
| I27 for other pulmonary heart diseases |
| J00-J06 for acute upper respiratory infections |
| J09-J18 for influenza and pneumonia |
| J20-J22 for other acute lower respiratory infections |
| J30-J39 for other diseases of upper respiratory tract |
| J40-J47 for chronic lower respiratory diseases |
| J60-J70 for lung diseases due to external agents |
| J80-J84 for other respiratory diseases principally affecting the interstitium |
| J85-J86 for suppurative and necrotic conditions of lower respiratory tract |
| J90-J94 for other diseases of pleura |
| J95-J99 for other diseases of the respiratory system |

Table S2. field IDs for UK Biobank variables other than disease used in this study.

| **Phenotype** | **Field ID** |
| --- | --- |
| **Exposure** |  |
| Albumin | 30600-0.0 |
| Alkaline Phosphatase | 30610-0.0 |
| Creatinine | 30700-0.0 |
| Glucose | 30740-0.0 |
| C-reactive Protein | 30710-0.0 |
| Lymphocyte percent | 30180-0.0 |
| Mean Cell Volume | 30270-0.0 |
| Red Cell Distribution Width | 30070-0.0 |
| White Blood Cells | 30000-0.0 |
| **Covariates** |  |
| Age | 21022-0.0 |
| Sex | 31-0.0 |
| Education | 26414-0.0 26421-0.0 26431-0.0 |
| BMI | 21001-0.0 |
| Smoking Status | 20116-0.0 |
| Employment Status | 6142-0.0 |
| Average Household Income | 738-0.0 |
| Sleep Duration | 1160-0.0 |
| Walking Speed | 924-0.0 |

Table S3: Baseline characteristicsin UK Biobank.

| **Characteristics** | **With Major chronic diseases** | | | | | **Without Major chronic diseases** | | | | |
| --- | --- | --- | --- | --- | --- | --- | --- | --- | --- | --- |
| **Total** | **Severe accelerated aging** | **Mild accelerated aging** | **Non-accelerated aging** | **P-value** | **Total** | **Severe accelerated aging** | **Mild accelerated aging** | **Non-accelerated aging** | **P-value** |
| **No.of participants** | 200511 | 52037(26.0) | 46346(23.1) | 102128(50.9) |  | 153108 | 27073(17.7) | 33294(21.7) | 92741(60.6) |  |
| **No.of Events** | 27875 | 10340(37.1) | 6362(22.8) | 11173(40.1) |  | 1450 | 386(26.6) | 364(25.1) | 700(48.3) |  |
| **PhenoAgeAccel, years** | 0.67(6.19) | 8.43(5.90) | 1.60(0.97) | -3.69(2.64) |  | -0.67(5.44) | 7.75(5.25) | 1.54(0.97) | -3.93(2.72) |  |
| Chronological age**, years** | 59.29(7.52) | 59.15(7.77) | 59.27(7.58) | 59.37(7.36) | <0.001 | 54.17(7.88) | 53.23(7.97) | 53.88(7.96) | 54.54(7.80) | <0.001 |
| **Mortality per 1000 person-years(95% Cl)** | 9.64(9.52, 9.75) | 14.23(13.96, 14.51) | 9.49(9.26, 9.73) | 7.47(7.33, 7.61) |  | 0.62(0.59, 0.65) | 0.94(0.85, 1.04) | 0.72(0.65, 0.80) | 0.49(0.46, 0.53) |  |
| **Sex** |  |  |  |  | <0.001 |  |  |  |  | <0.001 |
| Male | 100446(50.1) | 29464(56.6) | 25553(55.1) | 45429(44.5) |  | 63090(41.2) | 12136(44.8) | 15899(47.8) | 35055(37.8) |  |
| Female | 100065(49.9) | 22573(43.4) | 20793(44.9) | 56699(55.5) |  | 90018(58.8) | 14937(55.2) | 17395(52.2) | 57686(62.2) |  |
| **Smoking Status** |  |  |  |  | <0.001 |  |  |  |  | <0.001 |
| Current smoking | 22840(11.4) | 9973(19.2) | 5733(12.4) | 7134(7.0) |  | 14243(9.3) | 4397(16.2) | 3708(11.1) | 6138(6.6) |  |
| Never or Previous smoking | 176528(88.0) | 41705(80.1) | 40366(87.0) | 94487(92.5) |  | 138357(90.4) | 22562(83.4) | 29476(88.6) | 86319(93.1) |  |
| Miss | 1143(0.6) | 359(0.7) | 277(0.6) | 507(0.5) |  | 508(0.3) | 114(0.4) | 110(0.3) | 284(0.3) |  |
| **Employment Status** |  |  |  |  | <0.001 |  |  |  |  | <0.001 |
| Not in paid | 102150(50.9) | 28427(54.6) | 23270(50.2) | 50453(49.4) |  | 45024(29.4) | 7782(28.8) | 9393(28.2) | 27849(30.0) |  |
| In paid employment or self-employed | 96363(48.1) | 23022(44.2) | 22629(48.8) | 50712(49.7) |  | 106692(69.7) | 19009(70.2) | 23610(70.9) | 64073(69.1) |  |
| Miss | 1998(1.0) | 588(1.1) | 447(1.0) | 963(0.9) |  | 1392(0.9) | 282(1.0) | 291(0.9) | 819(0.9) |  |
| **BMI** |  |  |  |  | <0.001 |  |  |  |  | <0.001 |
| ≥30 | 59556(29.7) | 31343(60.2) | 15347(33.1) | 23877(23.4) |  | 26226(17.1) | 6907(25.5) | 6968(20.9) | 12351(13.3) |  |
| <30 | 140031(69.8) | 20332(39.1) | 30788(66.4) | 77900(76.3) |  | 126500(82.7) | 20076(74.2) | 26243(78.9) | 80181(86.5) |  |
| Miss | 924(0.5) | 362(0.7) | 211(0.5) | 351(0.3) |  | 382(0.2) | 90(0.3) | 83(0.2) | 209(0.2) |  |
| **Average Household Income** |  |  |  |  | <0.001 |  |  |  |  | <0.001 |
| <31000 | 94571(47.2) | 27058(52.0) | 22066(47.6) | 45447(44.5) |  | 52028(34.0) | 10243(37.8) | 11456(34.4) | 30329(32.7) |  |
| ≥31000 | 74919(37.3) | 16451(31.6) | 17249(37.2) | 41219(40.4) |  | 83365(54.4) | 13631(50.4) | 18104(54.4) | 51630(55.7) |  |
| Miss | 31021(15.5) | 8528(16.4) | 7031(15.2) | 15462(15.1) |  | 17715(11.6) | 3199(11.8) | 3734(11.2) | 10782(11.6) |  |
| **Sleep Duration** |  |  |  |  | 0.479 |  |  |  |  | 0.006 |
| ≤6h | 52176(26.0) | 14338(27.6) | 12046(26.0) | 25792(25.2) |  | 34471(22.5) | 6577(24.3) | 7727(23.2) | 20167(21.7) |  |
| ≥7h | 146600(73.1) | 37079(71.3) | 33871(73.1) | 75650(74.1) |  | 117868(77.0) | 20304(75.0) | 25393(76.3) | 72171(77.9) |  |
| Miss | 1735(0.9) | 620(1.2) | 429(0.9) | 686(0.7) |  | 769(0.5) | 192(0.7) | 174(0.5) | 403(0.4) |  |
| **Education** |  |  |  |  | <0.001 |  |  |  |  | 0.026 |
| Non-college | 98767(49.3) | 25522(49.0) | 23034(49.7) | 50211(49.2) |  | 76837(50.2) | 14361(53.0) | 16953(50.9) | 45523(49.1) |  |
| College | 55871(27.8) | 12432(23.9) | 12496(27.0) | 30943(30.3) |  | 58772(38.4) | 9178(33.9) | 12459(37.4) | 37135(40.0) |  |
| Miss | 45873(22.9) | 14083(27.1) | 10816(23.3) | 20974(20.5) |  | 17499(11.4) | 3534(13.1) | 3882(11.7) | 10083(10.9) |  |
| **Walking Speed** |  |  |  |  | <0.001 |  |  |  |  | <0.001 |
| Slow walking | 22498(11.3) | 9649(18.5) | 5219(11.3) | 7630(7.5) |  | 5457(3.6) | 1567(5.8) | 1255(3.8) | 2635(2.8) |  |
| Normal speed and fast walking | 175911(87.7) | 41483(79.8) | 40654(87.7) | 93774(91.8) |  | 146985(96.0) | 25338(93.6) | 31908(95.8) | 89739(96.8) |  |
| Miss | 2102(1.0) | 905(1.7) | 473(1.0) | 724(0.7) |  | 666(0.4) | 168(0.6) | 131(0.4) | 367(0.4) | Miss |

Data are presented as n, mean±SD or n (%), unless otherwise stated.PhenoAgeAccel: phenotypic age acceleration; BMI: body mass index.

Table S4:Compositional data for phenotypic age at baseline.

|  | **UK Biobank** | | | | | | | | | **Chinese Cohort** | | | |
| --- | --- | --- | --- | --- | --- | --- | --- | --- | --- | --- | --- | --- | --- |
| **Characteristics** | **With Major chronic diseases** | | | | **Without Major chronic diseases** | | | | | **With Major chronic diseases** | | | |
| **Total** | **Severe accelerated aging** | **Mild accelerated aging** | **Non-accelerated aging** | **Total** | **Severe accelerated aging** | **Mild accelerated aging** | **Non-accelerated aging** | **Total** | | **Severe accelerated aging** | **Mild accelerated aging** | **Non-accelerated aging** |
| **PhenoAgeAccel, years(SD)** | 0.67(6.19) | 8.43(5.90) | 1.60(0.97) | -3.69(2.64) | -0.67(5.44) | 7.75(5.25) | 1.54(0.97) | -3.93(2.72) | -1.56(12.91) | | 17.57(12.83) | 3.06(1.93) | -8.69(7.02) |
| **Chronological age, years** | 59.29(7.52) | 59.15(7.77) | 59.27(7.58) | 59.37(7.36) | 54.17(7.88) | 53.23(7.97) | 53.88(7.96) | 54.54(7.80) | 61.92(12.86) | | 68.91(13.70) | 67.94(11.65) | 58.02(11.27) |
| **PhenoAge, years** | 53.30(9.66) | 60.91(9.67) | 54.21(7.65) | 49.02(7.78) | 46.83(9.23) | 54.31(9.33) | 48.76(8.02) | 43.95(8.14) | 60.78(17.31) | | 84.33(13.05) | 69.21(7.79) | 51.19(11.42) |
| **Albumin, g/L** | 45.22(2.62) | 43.97(2.71) | 44.77(2.46) | 45.69(2.49) | 45.48(2.56) | 44.43(2.58) | 45.04(2.44) | 45.94(2.47) | 36.89(9.16) | | 29.69(12.93) | 34.83(8.85) | 39.67(6.02) |
| **Red Cell Distribution width, %** | 13.55(0.99) | 14.39(1.35) | 13.59(0.59) | 13.10(0.54) | 13.41(0.92) | 14.36(1.42) | 13.59(0.61) | 13.06(0.54) | 12.79(2.55) | | 14.47(4.53) | 12.93(1.15) | 12.25(1.65) |
| **Lymphocyte Percent, %** | 28.49(7.67) | 25.51(8.00) | 27.52(6.99) | 30.45(7.20) | 29.47(7.19) | 26.48(7.15) | 28.04(6.80) | 30.87(6.96) | 15.93(11.49) | | 11.97(9.63) | 12.81(9.34) | 18.05(12.05) |
| **Mean Cell Volume, fL** | 82.94(5.42) | 84.64(6.42) | 83.51(5.06) | 81.81(4.71) | 82.81(5.14) | 84.24(7.20) | 83.79(4.99) | 82.04(4.67) | 89.86(5.95) | | 89.72(7.88) | 90.48(6.13) | 89.71(5.15) |
| **Creatinine, μmol/L** | 73.49(18.00) | 80.20(25.43) | 75.09(14.61) | 69.35(12.98) | 70.63(13.42) | 74.54(15.21) | 73.51(13.74) | 68.45(12.24) | 65.74(33.34) | | 82.40(64.85) | 67.00(21.29) | 60.36(16.14) |
| **C-reactive Protein, mg/L** | 2.97(4.72) | 5.22(7.28) | 3.05(3.98) | 1.79(2.36) | 2.07(3.57) | 3.89(7.14) | 2.45(3.51) | 1.41(2.04) | 17.06(36.49) | | 35.72(55.48) | 23.20(41.07) | 9.62(23.01) |
| **White Blood Cells, 1000 cells/uL** | 45.03(2.64) | 43.97(2.71) | 44.77(2.46) | 45.69(2.49) | 45.48(2.56) | 44.43(2.58) | 45.04(2.44) | 45.94(2.47) | 5.72(4.96) | | 7.52(9.19) | 6.07(3.60) | 5.07(2.96) |
| **Alkaline Phosphatase, U/L** | 86.00(27.39) | 93.51(36.55) | 86.71(24.46) | 81.84(21.79) | 80.25(23.41) | 85.65(29.86) | 82.04(23.11) | 78.03(20.94) | 75.87(43.44) | | 89.49(77.87) | 77.80(37.32) | 71.14(26.53) |

Data are presented as n, mean±SD or n (%), unless otherwise stated.

Table S5: Probability of an event and mortality per 1000 person-years across subgroups in people with or without major chronic diseases from UK Biobank and people with major chronic diseases from Chinese Cohort, stratified by different aging subgroups.

|  | **UK Biobank** | | **Chinese Cohort** |
| --- | --- | --- | --- |
|  | **With Major chronic diseases** | **Without Major chronic diseases** | **With Major chronic diseases** |
|  | (n=200511) | (n=153108) | (n=307329) |
| **Total** | 9.64(9.52, 9.75) | 0.62(0.59, 0.65) | 10.42(10.28, 10.55) |
| **Ternary classification** |  |  |  |
| **Mortality per 1000 person-years(95% Cl)** |  |  |  |
| Severe accelerated aging | 14.23(13.96, 14.51) | 0.94(0.85, 1.04) | 19.01(18.58, 19.45) |
| Mild accelerated aging | 9.49(9.26, 9.73) | 0.72(0.65, 0.80) | 16.34(15.95, 16.75) |
| Non-accelerated aging | 7.47(7.33, 7.61) | 0.49(0.46, 0.53) | 6.21(6.08, 6.35) |
| **Binary classification** |  |  |  |
| **Events/total, %** |  |  |  |
| Accelerated aging | 16702/98383(16.9) | 750/60367(1.2) | 13578/115206(11.7) |
| Non-accelerated aging | 11173/102128(10.9) | 700/92741(0.7) | 8235/192123(4.2) |
| **Mortality per 1000 person-years(95% Cl)** |  |  |  |
| Accelerated aging | 11.96(11.78, 12.14) | 0.82(0.76, 0.88) | 17.67(17.38, 17.97) |
| Non-accelerated aging | 7.47(7.33, 7.61) | 0.49(0.46, 0.53) | 6.21(6.08, 6.35) |
| **Tertile classification** |  |  |  |
| **Events/total, %** |  |  |  |
| Tertile 1 | 12544/66837(18.7) | 666/51036(1.3) | 12323/102443(12.0) |
| Tertile 2 | 8349/66837(12.4) | 437/51036(0.8) | 7005/102443(6.8) |
| Tertile 3 | 6982/66837(10.4) | 347/51036(0.6) | 2485/102443(2.4) |
| **Mortality per 1000 person-years(95% Cl)** |  |  |  |
| Tertile 1 | 13.36(13.13, 13.60) | 0.86(0.79, 0.93) | 18.07(17.76, 18.39) |
| Tertile 2 | 8.58(8.40, 8.77) | 0.56(0.51, 0.62) | 9.92(9.69, 10.15) |
| Tertile 3 | 7.12(6.95, 7.28) | 0.44(0.40, 0.49) | 3.52(3.38, 3.66) |
| **Quartile classification** |  |  |  |
| **Events/total, %** |  |  |  |
| Quartile 1 | 10062/50128(20.0) | 524/38277(1.3) | 9520/76833(12.3) |
| Quartile 2 | 6900/50128(13.7) | 376/38277(0.9) | 7148/76832(9.3) |
| Quartile 3 | 5782/50128(11.5) | 289/38277(0.7) | 3455/76832(4.4) |
| Quartile 4 | 5131/50127(10.2) | 261/38277(0.6) | 1690/76832(2.1) |
| **Mortality per 1000 person-years(95% Cl)** |  |  |  |
| Quartile 1 | 14.39(14.11, 14.67) | 0.90(0.83, 0.98) | 18.67(18.30, 19.05) |
| Quartile 2 | 9.52(9.3, 9.75) | 0.64(0.58, 0.71) | 13.70(13.39, 14.02) |
| Quartile 2 | 7.90(7.70, 8.10) | 0.49(0.44, 0.55) | 6.44(6.23, 6.66) |

Table S6: PhenoAgeAccel of participants stratified by lifestyle factors in the UK Biobank.

|  | **PhenoAgeAccel median (IQR), years** | **PhenoAgeAccel median (IQR), years** |
| --- | --- | --- |
|  | **With Major chronic diseases** | **Without Major chronic diseases** |
| **Smoking Status** |  |  |
| Never or Previous | -0.43(-3.53, 3.14) | 0.83(-2.36, 4.37) |
| Current | 2.55(-0.92, 6.45) | -1.43(-4.31, 1.77) |
| **Employment Status** |  |  |
| In paid employment or self-employed | -0.31(-3.39, 3.19) | -1.17(-4.06, 2.08) |
| Not in paid | 0.07(-3.22, 3.94) | -1.41(-4.39, 1.9) |
| **BMI** |  |  |
| <30 | -0.69(-3.78, 2.9) | -1.57(-4.46, 1.66) |
| ≥30 | 1.22(-1.97, 4.96) | 0.33(-2.53, 3.61) |
| **Average Household Income** |  |  |
| ≥31000 | -0.59(-3.60, 2.85) | -1.36(-4.25, 1.80) |
| <31000 | 0.24(-3.03, 4.07) | -0.98(-3.99, 2.40) |
| **Sleep Duration** |  |  |
| ≥7h | -0.20(-3.36, 3.46) | -1.30(-4.20, 1.93) |
| ≤6h | 0.07(-3.14, 3.87) | -1.00(-4.04, 2.31) |
| **Education** |  |  |
| College | -0.65(-3.7, 2.89) | -1.53(-4.40, 1.65) |
| Non-college | -0.10(-3.27, 3.56) | -1.09(-4.04, 2.23) |
| **Walking Speed** |  |  |
| Normal speed and fast walking | -0.40(-3.50, 3.13) | -1.29(-4.20, 1.95) |
| Slow walking | 2.38(-1.37, 6.77) | 0.23(-2.95, 4.02) |

PhenoAgeAccel: phenotypic age acceleration; BMI: body mass index.

Table S7: Association between PhenoAgeAccel phenotype and risk of major chronic diseasesin UK Biobank.

|  | **Severe accelerated aging** | **Mild accelerated aging** | **P-value** | **Non-accelerated aging** | **P-value** | **PhenoAgeAccel** | **P-value** |
| --- | --- | --- | --- | --- | --- | --- | --- |
| **With Major chronic diseases** |  |  |  |  |  |  |  |
| **N** | 52037(26.0%) | 46346(23.1%) |  | 102128(50.9%) |  | 200511 |  |
| **Mode 0** | 1.00(reference) | 0.70(0.68, 0.72) | < 0.001 | 0.55(0.54, 0.57) | < 0.001 | 1.05(1.05, 1.06) | < 0.001 |
| **Mode 1** | 1.00(reference) | 0.70(0.68, 0.73) | < 0.001 | 0.57(0.56, 0.59) | < 0.001 | 1.05(1.05, 1.06) | < 0.001 |
| **Mode 2** | 1.00(reference) | 0.73(0.71, 0.75) | < 0.001 | 0.62(0.60, 0.64) | < 0.001 | 1.05(1.04, 1.05) | < 0.001 |
| **Mode 3** | 1.00(reference) | 0.77(0.74, 0.80) | < 0.001 | 0.67(0.65, 0.69) | < 0.001 | 1.04(1.04, 1.05) | < 0.001 |
| **Without Major chronic diseases** |  |  |  |  |  |  |  |
| **N** | 27073(17.7%) | 33294(21.7%) |  | 92741(60.6%) |  | 153108 |  |
| **Mode 0** | 1.00(reference) | 0.98(0.88, 1.08) | 0.665 | 0.78(0.71, 0.85) | <0.001 | 1.04(1.03, 1.04) | <0.001 |
| **Mode 1** | 1.00(reference) | 0.97(0.88, 1.07) | 0.533 | 0.79(0.73, 0.86) | <0.001 | 1.04(1.03, 1.05) | <0.001 |
| **Mode 2** | 1.00(reference) | 0.97(0.88, 1.07) | 0.566 | 0.81(0.74, 0.88) | <0.001 | 1.04(1.03, 1.05) | <0.001 |
| **Mode 3** | 1.00(reference) | 0.98(0.88, 1.08) | 0.65 | 0.82(0.75, 0.89) | <0.001 | 1.03(1.02, 1.04) | <0.001 |

Model 0 not adjusted.

Model 1 analysis for sex and BMI.

Model 2 analysis further adjusted for smoking status, sleep duration, and education.

Model 3 analysis further adjusted for walking speed, employment status, and average household income.

Table S8 : Association between PhenoAgeAccel and mortality in participants with or without major chronic diseases.

|  | **With Major chronic diseases** | | **Without Major chronic diseases** | |
| --- | --- | --- | --- | --- |
|  | **HR(95%CI)** | **P-value** | **HR(95%CI)** | **P-value** |
| **SEX** |  |  |  |  |
| Female | 1(reference) |  | 1(reference) |  |
| Male | 1.56(1.52, 1.60) | <0.001 | 1.12(1.01, 1.24) | <0.001 |
| **Smoking Status** |  |  |  |  |
| Never or Previous | 1(reference) |  | 1(reference) |  |
| Current | 1.69(1.64, 1.75) | <0.001 | 1.61(1.42, 1.82) | <0.001 |
| **Employment Status** |  |  |  |  |
| In paid employment or self-employed | 1(reference) |  | 1(reference) |  |
| Not in paid | 1.79(1.74, 1.85) | <0.001 | 1.61(1.48, 1.76) | <0.001 |
| **BMI** |  |  |  |  |
| <30 | 1(reference) |  | 1(reference) |  |
| ≥30 | 1.03(1.00, 1.06) | 0.051 | 1.12(1.01, 1.24) | 0.033 |
| **Average Household Income** |  |  |  |  |
| ≥31000 | 1(reference) |  | 1(reference) |  |
| <31000 | 1.40(1.35, 1.44) | <0.001 | 1.37(1.26, 1.49) | <0.001 |
| **Sleep Duration** |  |  |  |  |
| ≥7h | 1(reference) |  | 1(reference) |  |
| ≤6h | 0.98(0.95, 1.01) | 0.132 | 1.08(0.98, 1.19) | 0.117 |
| **Education** |  |  |  |  |
| College | 1(reference) |  | 1(reference) |  |
| Non-college | 1.09(1.05, 1.12) | <0.001 | 1.06(0.98, 1.16) | 0.16 |
| **Walking Speed** |  |  |  |  |
| Normal speed and fast walking | 1(reference) |  | 1(reference) |  |
| Slow walking | 1.61(1.56, 1.67) | <0.001 | 1.65(1.38, 1.98) | <0.001 |

Cox proportional hazards models adjusted for gender (male, female), BMI (underweight and normal/overweight and obese), smoking status (current/former and never smoked), education (college degree/non-college degree), employment status (In paid employment or self-employed/Not in paid), walking speed (normal speed and fast walking/slow walking), average household income (≥31, 000/<31, 000), and sleep duration (≤6h/≥7h) for UK Biobank.

Table S9: Mediating effects of PhenoAgeAccel on the relationship between current smoking, slow walking speed, employment status, lower average household income and mortality in participants with or without major chronic diseases.

| **Variants** | **Direct association β(95% CI)** | **p-value** | **Indirect association β (95% CI)** | **p-value** | **Mediation proportion % (95% CI)** | **p-value** |
| --- | --- | --- | --- | --- | --- | --- |
| **With Major chronic diseases** |  |  |  |  |  |  |
| Current smoking | 0.0835(0.0778, 0.0890) | <0.001 | 0.0161(0.0153, 0.0170) | <0.001 | 16.21(15.01, 17.57) | <0.001 |
| Slow walking speed | 0.1034(0.0974, 0.1088) | <0.001 | 0.0144(0.0136, 0.01533) | <0.001 | 12.25(11.39, 13.21) | <0.001 |
| Employment status(Not in paid) | 0.0919(0.0889, 0.0950) | <0.001 | 0.0030(0.0026, 0.0033) | <0.001 | 3.12 (2.76, 3.47) | <0.001 |
| Lower average household income(＜31000£) | 0.0711(0.0683, 0.0739) | <0.001 | 0.0052(0.0048, 0.0056) | <0.001 | 6.80(6.27, 7.40) | <0.001 |
| **Without Major chronic diseases** |  |  |  |  |  |  |
| Current smoking | 0.0099(0.0078, 0.0124) | <0.001 | 0.0010(0.0007, 0.0012) | <0.001 | 8.93(6.41, 11.85) | <0.001 |
| Slow walking speed | 0.0160(0.0118, 0.0202) | <0.001 | 0.0008( 0.0006, 0.0010) | <0.001 | 4.52(3.25, 6.58) | <0.001 |
| Employment status(Not in paid) | 0.0105(0.0092, 0.0118) | <0.001 | -0.0001( -0.0001, 0.0000) | <0.001 | -0.79(-1.14, -0.48) | <0.001 |
| Lower average household income(＜31000£) | 0.0073(0.0062, 0.0084) | <0.001 | 0.0002(0.0002, 0.0003) | <0.001 | 2.73(2.04, 3.57) | <0.001 |

Table S10: Estimated and prolonged life expectancy at age 45 and 65 for participants with and without major chronic diseases after adding some covariates for control (n=353619).

|  | **With Major chronic diseases** | **Without Major chronic diseases** |
| --- | --- | --- |
|  | (n=200511) | (n=153108) |
| **Life expectancy, 45 y** |  |  |
| Severe accelerated aging | 40.70(40.39, 41.01) | 51.71(51.11, 52.32) |
| Mild accelerated aging | 43.54(43.24, 43.85) | 52.31(51.80, 52.82) |
| Non-accelerated aging | 44.62(44.36, 44.88) | 52.87(52.48, 53.26) |
| **Life expectancy, 65 y** |  |  |
| Severe accelerated aging | 23.16(22.89, 23.42) | 32.02(31.43, 32.60) |
| Mild accelerated aging | 25.46(25.20, 25.73) | 32.56(32.07, 33.05) |
| Non-accelerated aging | 26.35(26.12, 26.58) | 33.06(32.68, 33.44) |
| **Years of life gained, 45 y** |  |  |
| Severe accelerated aging | Reference | Reference |
| Mild accelerated aging | 2.84(2.41, 3.28) | 0.60(-0.19, 1.39) |
| Non-accelerated aging | 3.92(3.51, 4.33) | 1.16(0.44, 1.88) |
| **Years of life gained, 65 y** |  |  |
| Severe accelerated aging | Reference | Reference |
| Mild accelerated aging | 2.31(1.93, 2.68) | 0.54(-0.22, 1.30) |
| Non-accelerated aging | 3.19(2.84, 3.54) | 1.05(0.35, 1.74) |

The Royston–Parmar proportion-hazards survival model adjusted for gender (male, female), BMI (underweight and normal/overweight and obese), smoking status (current/former and never smoked), employment status (In paid employment or self-employed/Not in paid), walking speed (normal speed and fast walking/slow walking), and sleep duration (≤6h/≥7h) for UK Biobank

Table S11: Estimated value, prolonged value, and average gain of life expectancy related to aging changes at age 45, and estimated value and prolonged value of life expectancy related to aging changes at age 65 in participants with/without major chronic diseases from UK Biobank and participants with major chronic diseases from Chinese Cohort, across different aging subgroups.

|  | **UK Biobank** | | **Chinese Cohort** |
| --- | --- | --- | --- |
|  | **With Major chronic diseases** | **Without Major chronic diseases** | **With Major chronic diseases** |
|  | (n=200511) | (n=153108) | (n=307329) |
| **Binary classification** |  |  |  |
| **Life expectancy, 45 y** |  |  |  |
| Accelerated aging | 40.89(40.61, 41.17) | 51.56(51.00, 52.11) | 42.61(42.39, 42.82) |
| Non-accelerated aging | 45.06(44.81, 45.32) | 52.94(52.58, 53.30) | 46.00(45.81, 46.20) |
| **Years of life gained, 45 y** |  |  |  |
| Accelerated aging | Reference | Reference | Reference |
| Non-accelerated aging | 4.17(3.79, 4.55) | 1.39(0.72, 2.05) | 3.40(3.11, 3.69) |
| **Life expectancy, 65 y** |  |  |  |
| Accelerated aging | 23.20(22.96,23.44) | 31.86(31.31,32.40) | 25.30(25.15, 25.44) |
| Non-accelerated aging | 26.66(26.43,26.88) | 33.12(32.77,33.47) | 27.97(27.81, 28.13) |
| **Years of life gained, 65 y** |  |  |  |
| Accelerated aging | Reference | Reference | Reference |
| Non-accelerated aging | 3.45(3.12, 3.78) | 1.26(0.62, 1.91) | 2.67(2.46, 2.89) |
| **Tertile classification** |  |  |  |
| **Life expectancy, 45 y** |  |  |  |
| Tertile 1 | 39.78(39.49, 40.08) | 51.39(50.81, 51.97) | 42.33(42.10, 42.56) |
| Tertile 2 | 43.92(43.63, 44.20) | 52.64(52.22, 53.07) | 44.65(44.42, 44.88) |
| Tertile 3 | 45.45(45.17, 45.72) | 53.15(52.80, 53.51) | 47.82(47.55, 48.09) |
| **Years of life gained, 45 y** |  |  |  |
| Tertile 1 | Reference | Reference | Reference |
| Tertile 2 | 4.13(3.72, 4.54) | 1.25(0.53, 1.98) | 2.33(2.00, 2.65) |
| Tertile 3 | 5.66(5.26, 6.07) | 1.76(1.08, 2.45) | 5.50(5.14, 5.85) |
| **Life expectancy, 65 y** |  |  |  |
| Tertile 1 | 22.29(22.04, 22.54) | 31.71(31.14, 32.27) | 25.25(25.10, 25.41) |
| Tertile 2 | 25.70(25.45, 25.95) | 32.84(32.43, 33.26) | 27.05(26.88, 27.22) |
| Tertile 3 | 26.97(26.73, 27.21) | 33.31(32.97, 33.65) | 29.50(29.28, 29.72) |
| **Years of life gained, 65 y** |  |  |  |
| Tertile 1 | Reference | Reference | Reference |
| Tertile 2 | 3.41(3.05, 3.76) | 1.14(0.44, 1.84) | 1.80(1.57,02.03) |
| Tertile 3 | 4.68(4.34, 5.03) | 1.61(0.94, 2.27) | 4.25(3.98,04.51) |
| **Years of life lost between adjacent groups** **at age 45 years** |  |  |  |
| Tertile 2 vs Tertile 1 | 4.13(3.72, 4.54) | 1.25(0.53, 1.98) | 2.33(2.00, 2.65) |
| Tertile 3 vs Tertile 2 | 1.53(1.14, 1.93) | 0.51(-0.04, 1.07) | 3.17(2.82, 3.52) |
| **Average mean gained in different PhenoAgeAccel category discrease compared to Tertile 3** | 2.83(2.43, 3.24) | 0.88(0.24, 1.52) | 2.75(2.41, 3.09) |
| **Quartile classification** |  |  |  |
| **Life expectancy, 45 y** |  |  |  |
| Quartile 1 | 38.99(38.68,39.31) | 51.18(50.55,51.81) | 42.13(41.88, 42.39) |
| Quartile 2 | 43.04(42.73,43.35) | 52.29(51.80,52.78) | 43.42(43.17, 43.68) |
| Quartile 3 | 44.60(44.30,44.90) | 52.91(52.51,53.32) | 46.40(46.13, 46.66) |
| Quartile 4 | 45.61(45.32,45.90) | 53.16(52.79,53.53) | 47.83(47.51, 48.15) |
| **Years of life gained, 45 y** |  |  |  |
| Quartile 1 | Reference | Reference | Reference |
| Quartile 2 | 4.04(3.6,4.49) | 1.11(0.31,1.9) | 1.29(0.93, 1.65) |
| Quartile 3 | 5.60(5.17,6.04) | 1.73(0.98,2.48) | 4.26(3.90, 4.63) |
| Quartile 4 | 6.62(6.19,7.05) | 1.98(1.25,2.7) | 5.69(5.29, 6.10) |
| **Life expectancy, 65 y** |  |  |  |
| Quartile 1 | 21.63(21.37,21.90) | 31.52(30.91,32.12) | 25.12(24.95, 25.29) |
| Quartile 2 | 24.96(24.69,25.23) | 32.52(32.05,33.00) | 26.12(25.94, 26.29) |
| Quartile 3 | 26.26(26.00,26.52) | 33.09(32.70,33.48) | 28.41(28.21, 28.62) |
| Quartile 4 | 27.10(26.85,27.36) | 33.31(32.96,33.67) | 29.51(29.26, 29.77) |
| **Years of life gained, 65 y** |  |  |  |
| Quartile 1 | Reference | Reference | Reference |
| Quartile 2 | 3.33(2.95,3.7) | 1.01(0.23,1.78) | 1.00(0.75, 1.24) |
| Quartile 3 | 4.62(4.25,4.99) | 1.58(0.85,2.3) | 3.29(3.02, 3.56) |
| Quartile 4 | 5.47(5.1,5.83) | 1.8(1.09,2.5) | 4.39(4.08, 4.70) |
| **Years of life lost between adjacent groups** **at age 45 years** |  |  |  |
| Quartile 2 vs Quartile 1 | 1.01(0.6,1.43) | 0.24(-0.31,0.79) | 1.29(0.93, 1.65) |
| Quartile 3 vs Quartile 2 | 1.56(1.13,1.99) | 0.62(-0.01,1.26) | 2.97(2.61, 3.34) |
| Quartile 4 vs Quartile 3 | 4.04(3.6,4.49) | 1.11(0.31,1.9) | 1.43(1.02, 1.84) |
| **Average mean gained in different PhenoAgeAccel category discrease compared to Quartile 1** | 2.21(1.78,2.64) | 0.66(0,1.32) | 1.90(1.52, 2.28) |

Table S12: Death rates per 1,000 person-years, hazard ratios, estimated and prolonged life expectancy at age 45 and 65 for participants with and without major chronic diseases from UK Biobank and participants with major chronic diseases from Chinese Cohort, in different age subgroups (subgrouped by chronological age at 60 years of age).

|  | **Chronological age < 60** | | | **chronological age ≥ 60** | | |
| --- | --- | --- | --- | --- | --- | --- |
|  | **UK Biobank** | | **Chinese Cohort** | **UK Biobank** | | **Chinese Cohort** |
|  | **With Major chronic diseases** | **Without Major chronic diseases** | **With Major chronic diseases** | **With Major chronic diseases** | **Without Major chronic diseases** | **With Major chronic diseases** |
|  | (n=89966) | (n=109987) | (n=132583) | (n=110545) | (n=43121) | (n=174746) |
| **Number of Participant, %** |  |  |  |  |  |  |
| Severe accelerated aging | 23588(26.3) | 20287(18.5) | 14459(10.9) | 28449(25.8) | 6786(15.7) | 43144(24.7) |
| Mild accelerated aging | 20769(23.1) | 24156(21.9) | 13275(10.0) | 25577(23.1) | 9138(21.2) | 44328(25.3) |
| Non-accelerated aging | 45609(50.6) | 65544(59.6) | 104849(79.1) | 56519(51.1) | 27197(63.1) | 87274(50.0) |
| **Mortality per 1000 person-years(95% Cl)** |  |  |  |  |  |  |
| Total | 5.48(5.36, 5.61) | 0.39(0.37, 0.43) | 3.38(3.26, 3.5) | 13.18(13.01, 13.36) | 1.20(1.12, 1.29) | 15.96(15.73, 16.19) |
| Severe accelerated aging | 7.97(7.67, 8.27) | 0.60(0.52, 0.70) | 6.22(5.75, 6.73) | 19.82(19.38, 20.27) | 1.96(1.70, 2.25) | 23.62(23.06, 24.19) |
| Mild accelerated aging | 5.33(5.08, 5.60) | 0.46(0.39, 0.54) | 5.65(5.19, 6.16) | 13.03(12.66, 13.40) | 1.40(1.21, 1.62) | 19.70(19.21, 20.21) |
| Non-accelerated aging | 4.30(4.14, 4.46) | 0.31(0.27, 0.34) | 2.70(2.58, 2.82) | 10.12(9.91, 10.34) | 0.95(0.86, 1.05) | 10.51(10.25, 10.77) |
| **PhenoAgeAccel category, HR(95%CI)** |  |  |  |  |  |  |
| Severe accelerated aging | 1(Reference) | 1(Reference) | 1(Reference) | 1(Reference) | 1(Reference) | 1(Reference) |
| Mild accelerated aging | 0.81(0.76, 0.86) | 1.02(0.90, 1.16) | 0.90(0.80, 1.00) | 0.74(0.72, 0.77) | 0.96(0.82, 1.13) | 0.83(0.80, 0.86) |
| Non-accelerated aging | 0.72(0.68, 0.76) | 0.84(0.75, 0.94) | 0.46(0.42, 0.50) | 0.64(0.62, 0.66) | 0.70(0.61, 0.81) | 0.45(0.43, 0.46) |
| **Life expectancy, 45 y** |  |  |  |  |  |  |
| Severe accelerated aging | 42.03(41.28, 42.77) | 51.80(50.74, 52.86) | 43.89(42.51, 45.28) | 41.37(41.02, 41.73) | 50.01(48.68, 51.34) | 44.29(44.02, 44.55) |
| Mild accelerated aging | 45.80(45.15, 46.45) | 52.59(51.77, 53.42) | 45.52(44.26, 46.78) | 44.65(44.29, 45.01) | 51.20(50.09, 52.32) | 44.98(44.72, 45.24) |
| Non-accelerated aging | 47.52(47.02, 48.03) | 53.45(52.93, 53.96) | 49.63(48.94, 50.31) | 46.34(46.04, 46.65) | 52.23(51.39, 53.07) | 47.09(46.88, 47.30) |
| **Life expectancy, 65 y** |  |  |  |  |  |  |
| Severe accelerated aging | 25.18(24.45, 25.90) | 32.16(31.13, 33.20) | 28.16(26.82, 29.51) | 21.80(21.48, 22.12) | 30.11(28.81, 31.41) | 25.14(24.94, 25.35) |
| Mild accelerated aging | 28.06(27.46, 28.66) | 32.87(32.06, 33.67) | 29.19(28.01, 30.38) | 24.97(24.63, 25.30) | 31.27(30.18, 32.36) | 25.78(25.58, 25.98) |
| Non-accelerated aging | 29.37(28.89, 29.85) | 33.62(33.11, 34.13) | 31.74(31.06, 32.42) | 26.60(26.31, 26.89) | 32.28(31.46, 33.11) | 27.73(27.56, 27.90) |
| **Years of life gained, 45 y** |  |  |  |  |  |  |
| Severe accelerated aging | Reference | Reference | Reference | Reference | Reference | Reference |
| Mild accelerated aging | 3.77(2.79, 4.76) | 0.79(-0.55, 2.13) | 1.63(-0.25, 3.50) | 3.28(2.77, 3.78) | 1.19(-0.54, 2.93) | 0.69(0.32, 1.06) |
| Non-accelerated aging | 5.50(4.60, 6.40) | 1.65(0.47, 2.82) | 5.73(4.19, 7.28) | 4.97(4.50, 5.44) | 2.22(0.65, 3.80) | 2.80(2.47, 3.14) |
| **Years of life gained, 65 y** |  |  |  |  |  |  |
| Severe accelerated aging | Reference | Reference | Reference | Reference | Reference | Reference |
| Mild accelerated aging | 2.89(1.94, 3.83) | 0.70(-0.61, 2.01) | 1.03(-0.76, 2.82) | 3.16(2.70, 3.63) | 1.17(-0.53, 2.86) | 0.64(0.35, 0.92) |

Cox proportional hazards models adjusted for gender (male, female), BMI (underweight and normal/overweight and obese), smoking status (current/former and never smoked), education (college degree/non-college degree), employment status (In paid employment or self-employed/Not in paid), walking speed (normal speed and fast walking/slow walking), average household income (≥31, 000/<31, 000), and sleep duration (≤6h/≥7h) for UK Biobank.

Table S13: Death rates per 1,000 person-years, hazard ratios, estimated and prolonged life expectancy at age 45 and 65 for participants with and without major chronic diseases (excluding CVD) from UK Biobank and participants with major chronic diseases (excluding CVD) from Chinese Cohort.

|  | **UK Biobank** | | **Chinese Cohort** |
| --- | --- | --- | --- |
|  | **With Dementia Diabetes Cancer Respiratory diseases** | **Without Dementia Diabetes Cancer Respiratory diseases** | **With Dementia Diabetes Cancer Respiratory diseases** |
|  | (n=150259) | (n=203360) | (n=95084) |
| **Number of Participants, %** |  |  |  |
| Severe accelerated aging | 41239(27.5) | 37871(18.6) | 14012(14.7) |
| Mild accelerated aging | 34781(23.1) | 44859(22.1) | 13662(14.4) |
| Non-accelerated aging | 74239(49.4) | 120630(59.3) | 67410(70.9) |
| **Mortality per 1000 person-years(95% Cl)** |  |  |  |
| Total | 11.29(11.15, 11.43) | 1.22(1.18, 1.26) | 4.42(4.25, 4.59) |
| Severe accelerated aging | 15.49(15.17, 15.81) | 2.02(1.90, 2.14) | 7.69(7.12, 8.30) |
| Mild accelerated aging | 11.05(10.76, 11.34) | 1.35(1.27, 1.45) | 7.63(7.05, 8.26) |
| Non-accelerated aging | 9.19(9.01, 9.37) | 0.92(0.87, 0.96) | 3.08(2.92, 3.26) |
| **PhenoAgeAccel category, HR(95%CI)** |  |  |  |
| Severe accelerated aging | 1(Reference) | 1(Reference) | 1(Reference) |
| Mild accelerated aging | 0.80(0.77, 0.83) | 0.91(0.85, 0.98) | 0.99(0.87,1.10) |
| Non-accelerated aging | 0.73(0.71, 0.75) | 0.73(0.69, 0.78) | 0.42(0.28,0.46) |
| **Life expectancy, 45 y** |  |  |  |
| Severe accelerated aging | 35.55(35.26, 35.84) | 49.09(48.55, 49.62) | 45.88(45.23, 46.52) |
| Mild accelerated aging | 39.06(38.74, 39.39) | 50.93(50.51, 51.35) | 45.94(45.28, 46.60) |
| Non-accelerated aging | 40.93(40.65, 41.22) | 52.19(51.90, 52.47) | 47.97(47.52, 48.42) |
| **Life expectancy, 65 y** |  |  |  |
| Severe accelerated aging | 18.60(18.37, 18.82) | 29.67(29.15, 30.18) | 28.05(27.56, 28.54) |
| Mild accelerated aging | 21.44(21.16, 21.71) | 31.32(30.92, 31.72) | 28.10(27.59, 28.61) |
| Non-accelerated aging | 22.99(22.74, 23.23) | 32.46(32.19, 32.73) | 29.65(29.26, 30.04) |
| **Years of life gained, 45 y** |  |  |  |
| Severe accelerated aging | Reference | Reference | Reference |
| Mild accelerated aging | 3.51(3.08, 3.94) | 1.84(1.16, 2.52) | 0.06(-0.86, 0.99) |
| Non-accelerated aging | 5.38(4.98, 5.79) | 3.10(2.50, 3.71) | 2.09(1.30, 2.88) |
| **Years of life gained, 65 y** |  |  |  |
| Severe accelerated aging | Reference | Reference | Reference |
| Mild accelerated aging | 2.84(2.49, 3.19) | 1.66(1.01, 2.30) | 0.05(-0.66, 0.76) |

Cox proportional hazards models: adjusted for gender (male, female), BMI (underweight and normal/overweight and obese), smoking status (current/former and never smoked), education (college degree/non-college degree), employment status (in paid employment or self-employed/not in paid), walking speed (normal speed and fast walking/slow walking), average household income (≥31,000/<31,000), and sleep duration (≤6h/≥7h) for UK Biobank; only adjusted for gender (male, female) for Chinese Cohort.

Table S14: Death rates per 1,000 person-years, hazard ratios, estimated and prolonged life expectancy at age 45 and 65 for participants with and without major chronic diseases (excluding diabetes) from UK Biobank and participants with major chronic diseases (excluding diabetes) from Chinese Cohort.

|  | **UK Biobank** | | **Chinese Cohort** |
| --- | --- | --- | --- |
|  | **With Dementia CVD Cancer Respiratory diseases** | **Without Dementia CVD Cancer Respiratory diseases** | **With Dementia CVD Cancer Respiratory diseases** |
|  | (n=197380) | (n=156239) | (n=175621) |
| **Number of Participants, %** |  |  |  |
| Severe accelerated aging | 51323(26.0) | 27787(17.8) | 28533(16.2) |
| Mild accelerated aging | 45621(23.1) | 34019(21.8) | 31648(18.1) |
| Non-accelerated aging | 100436(50.9) | 94433(60.4) | 115440(65.7) |
| **Mortality per 1000 person-years(95% Cl)** |  |  |  |
| Total | 9.66(9.55, 9.78) | 0.64(0.6, 0.67) | 10.11(9.93, 10.30) |
| Severe accelerated aging | 14.21(13.94, 14.49) | 0.95(0.86, 1.05) | 20.31(19.67, 20.96) |
| Mild accelerated aging | 9.53(9.29, 9.76) | 0.74(0.67, 0.82) | 16.89(16.34, 17.45) |
| Non-accelerated aging | 7.51(7.37, 7.65) | 0.51(0.47, 0.54) | 5.83(5.66, 6.00) |
| **PhenoAgeAccel category, HR(95%CI)** |  |  |  |
| Severe accelerated aging | 1(Reference) | 1(Reference) | 1(Reference) |
| Mild accelerated aging | 0.77(0.74, 0.80) | 1.02(0.93, 1.13) | 0.82(0.79,0.86) |
| Non-accelerated aging | 0.68(0.66, 0.70) | 0.81(0.74, 0.88) | 0.29(0.28,0.30) |
| **Life expectancy, 45 y** |  |  |  |
| Severe accelerated aging | 37.15(36.87, 37.43) | 50.97(50.30, 51.63) | 42.69(42.31, 43.06) |
| Mild accelerated aging | 41.02(40.71, 41.33) | 51.94(51.41, 52.47) | 43.51(43.16, 43.86) |
| Non-accelerated aging | 43.10(42.84, 43.36) | 52.91(52.55, 53.26) | 46.35(46.10, 46.60) |
| **Life expectancy, 65 y** |  |  |  |
| Severe accelerated aging | 19.99(19.76, 20.21) | 31.33(30.69, 31.97) | 25.28(25.01, 25.55) |
| Mild accelerated aging | 23.14(22.88, 23.41) | 32.21(31.70, 32.72) | 25.93(25.68, 26.18) |
| Non-accelerated aging | 24.87(24.65, 25.10) | 33.09(32.74, 33.43) | 28.18(27.98, 28.39) |
| **Years of life gained, 45 y** |  |  |  |
| Severe accelerated aging | Reference | Reference | Reference |
| Mild accelerated aging | 3.87(3.45, 4.28) | 0.97(0.12, 1.82) | 0.82(0.31, 1.33) |
| Non-accelerated aging | 5.95(5.56, 6.33) | 1.94(1.18, 2.69) | 3.66(3.21, 4.11) |
| **Years of life gained, 65 y** |  |  |  |
| Severe accelerated aging | Reference | Reference | Reference |
| Mild accelerated aging | 3.16(2.81, 3.50) | 0.88(0.06, 1.70) | 0.65(0.28, 1.02) |

Cox proportional hazards models: adjusted for gender (male, female), BMI (underweight and normal/overweight and obese), smoking status (current/former and never smoked), education (college degree/non-college degree), employment status (in paid employment or self-employed/not in paid), walking speed (normal speed and fast walking/slow walking), average household income (≥31,000/<31,000), and sleep duration (≤6h/≥7h) for UK Biobank; only adjusted for gender (male, female) for Chinese Cohort.

Table S15: Death rates per 1,000 person-years, hazard ratios, estimated and prolonged life expectancy at age 45 and 65 for participants with and without major chronic diseases (excluding respiratory diseases) from UK Biobank and participants with major chronic diseases (excluding respiratory diseases) from Chinese Cohort.

|  | **UK Biobank** | | **Chinese Cohort** |
| --- | --- | --- | --- |
|  | **With Dementia CVD Diabetes Cancer** | **Without Dementia CVD Diabetes Cancer** | **With Dementia CVD Diabetes Cancer** |
|  | (n=176908) | (n=176711) | (n=90102) |
| **Number of Participants, %** |  |  |  |
| Severe accelerated aging | 46456(26.3) | 32654(18.5) | 14710(16.3) |
| Mild accelerated aging | 40938(23.1) | 38702(21.9) | 15666(17.4) |
| Non-accelerated aging | 89514(50.6) | 105355(59.6) | 59726(66.3) |
| **Mortality per 1000 person-years(95% Cl)** |  |  |  |
| Total | 9.83(9.71, 9.95) | 0.87(0.83, 0.9) | 5.88(5.69, 6.08) |
| Severe accelerated aging | 13.89(13.61, 14.18) | 1.47(1.37, 1.58) | 11.48(10.83, 12.17) |
| Mild accelerated aging | 9.71(9.46, 9.96) | 0.95(0.87, 1.03) | 9.71(9.13, 10.33) |
| Non-accelerated aging | 7.88(7.73, 8.03) | 0.65(0.61, 0.69) | 3.59(3.42, 3.78) |
| **PhenoAgeAccel category, HR(95%CI)** |  |  |  |
| Severe accelerated aging | 1(Reference) | 1(Reference) | 1(Reference) |
| Mild accelerated aging | 0.79(0.76, 0.81) | 0.94(0.86, 1.02) | 0.85(0.78,0.92) |
| Non-accelerated aging | 0.70(0.68, 0.72) | 0.76(0.71, 0.82) | 0.32(0.29,0.34) |
| **Life expectancy, 45 y** |  |  |  |
| Severe accelerated aging | 36.56(36.26, 36.86) | 49.81(49.18, 50.44) | 45.42(44.89, 45.95) |
| Mild accelerated aging | 40.47(40.15, 40.79) | 51.60(51.14, 52.07) | 46.03(45.51, 46.55) |
| Non-accelerated aging | 42.56(42.29, 42.83) | 52.69(52.38, 53.00) | 48.58(48.22, 48.94) |
| **Life expectancy, 65 y** |  |  |  |
| Severe accelerated aging | 19.81(19.58, 20.04) | 30.31(29.70, 30.91) | 27.45(27.05, 27.84) |
| Mild accelerated aging | 22.93(22.66, 23.19) | 31.93(31.48, 32.37) | 27.93(27.53, 28.32) |
| Non-accelerated aging | 24.63(24.40, 24.86) | 32.90(32.61, 33.20) | 29.94(29.64, 30.24) |
| **Years of life gained, 45 y** |  |  |  |
| Severe accelerated aging | Reference | Reference | Reference |
| Mild accelerated aging | 3.91(3.47, 4.35) | 1.80(1.01, 2.58) | 0.61(-0.14,1.36) |
| Non-accelerated aging | 6.00(5.60, 6.40) | 2.88(2.18, 3.58) | 3.16(2.52, 3.80) |
| **Years of life gained, 65 y** |  |  |  |
| Severe accelerated aging | Reference | Reference | Reference |
| Mild accelerated aging | 3.12(2.77, 3.47) | 1.62(0.87, 2.37) | 0.48(-0.08, 1.04) |

Cox proportional hazards models: adjusted for gender (male, female), BMI (underweight and normal/overweight and obese), smoking status (current/former and never smoked), education (college degree/non-college degree), employment status (in paid employment or self-employed/not in paid), walking speed (normal speed and fast walking/slow walking), average household income (≥31,000/<31,000), and sleep duration (≤6h/≥7h) for UK Biobank; only adjusted for gender (male, female) for Chinese Cohort.

Table S16: Death rates per 1,000 person-years, hazard ratios, estimated and prolonged life expectancy at age 45 and 65 for participants with and without major chronic diseases (excluding cancer) from UK Biobank and participants with major chronic diseases (excluding cancer) from Chinese Cohort.

|  | **UK Biobank** | | **Chinese Cohort** |
| --- | --- | --- | --- |
|  | **With Dementia CVD Diabetes Respiratory diseases** | **Without Dementia CVD Diabetes Respiratory diseases** | **With Dementia CVD Diabetes Respiratory diseases** |
|  | (n=179713) | (n=173906) | (n=229291) |
| **Number of Participants, %** |  |  |  |
| Severe accelerated aging | 48350(26.9) | 30760(17.7) | 41832(18.2) |
| Mild accelerated aging | 41867(23.3) | 37773(21.7) | 43105(18.8) |
| Non-accelerated aging | 89496(49.8) | 105373(60.6) | 144354(63.0) |
| **Mortality per 1000 person-years(95% Cl)** |  |  |  |
| Total | 6.46(6.37, 6.56) | 1.42(1.37, 1.46) | 8.97(8.82, 9.12) |
| Severe accelerated aging | 10.41(10.17, 10.66) | 1.95(1.45, 1.66) | 18.46(17.96, 18.97) |
| Mild accelerated aging | 6.29(6.09, 6.49) | 1.55(1.45, 1.66) | 14.73(14.3, 15.18) |
| Non-accelerated aging | 4.51(4.4, 4.63) | 1.21(1.16, 1.27) | 4.69(4.55, 4.82) |
| **PhenoAgeAccel category, HR(95%CI)** |  |  |  |
| Severe accelerated aging | 1(Reference) | 1(Reference) | 1(Reference) |
| Mild accelerated aging | 0.73(0.70, 0.76) | 0.96(0.89, 1.03) | 0.80(0.76,0.83) |
| Non-accelerated aging | 0.60(0.58, 0.63) | 0.81(0.76, 0.87) | 0.25(0.24,0.26) |
| **Life expectancy, 45 y** |  |  |  |
| Severe accelerated aging | 37.05(36.76, 37.33) | 50.26(49.81, 50.70) | 43.22(42.91, 43.52) |
| Mild accelerated aging | 40.89(40.57, 41.21) | 51.30(50.94, 51.66) | 44.45(44.16, 44.74) |
| Non-accelerated aging | 42.96(42.69, 43.23) | 52.16(51.91, 52.41) | 47.67(47.46, 47.88) |
| **Life expectancy, 65 y** |  |  |  |
| Severe accelerated aging | 19.69(19.45, 19.92) | 30.98(30.57, 31.39) | 25.44(25.22, 25.66) |
| Mild accelerated aging | 22.86(22.59, 23.13) | 31.86(31.53, 32.19) | 26.44(26.22, 26.66) |
| Non-accelerated aging | 24.60(24.36, 24.84) | 32.59(32.35, 32.82) | 29.06(28.88, 29.23) |
| **Years of life gained, 45 y** |  |  |  |
| Severe accelerated aging | Reference | Reference | Reference |
| Mild accelerated aging | 3.84(3.42, 4.27) | 1.04(0.47, 1.61) | 1.23(0.81, 1.65) |
| Non-accelerated aging | 5.91(5.52, 6.31) | 1.90(1.39, 2.41) | 4.45(4.08, 4.82) |
| **Years of life gained, 65 y** |  |  |  |
| Severe accelerated aging | Reference | Reference | Reference |
| Mild accelerated aging | 3.17(2.82, 3.53) | 0.88(0.36, 1.41) | 1.00(0.69, 1.31) |

Cox proportional hazards models: adjusted for gender (male, female), BMI (underweight and normal/overweight and obese), smoking status (current/former and never smoked), education (college degree/non-college degree), employment status (in paid employment or self-employed/not in paid), walking speed (normal speed and fast walking/slow walking), average household income (≥31,000/<31,000), and sleep duration (≤6h/≥7h) for UK Biobank; only adjusted for gender (male, female) for Chinese Cohort.

Table S17: Death rates per 1,000 person-years, hazard ratios, estimated and prolonged life expectancy at age 45 and 65 for participants with and without major chronic diseases (excluding dementia) from UK Biobank and participants with major chronic diseases (excluding dementia) from Chinese Cohort.

|  | **UK Biobank** | | **Chinese Cohort** |
| --- | --- | --- | --- |
|  | **With CVD Diabetes Cancer Respiratory diseases** | **Without CVD Diabetes Cancer Respiratory diseases** | **With CVD Diabetes Cancer Respiratory diseases** |
|  | (n=199715) | (n=153904) | (n=294120) |
| **Number of Participants, %** |  |  |  |
| Severe accelerated aging | 51917(26.0) | 27193(17.7) | 55285(18.8) |
| Mild accelerated aging | 46194(23.1) | 33446(21.7) | 55048(18.7) |
| Non-accelerated aging | 101604(50.9) | 93265(60.6) | 183787(62.5) |
| **Mortality per 1000 person-years(95% Cl)** |  |  |  |
| Total | 9.16(9.05, 9.27) | 0.8(0.77, 0.84) | 10.32(10.18, 10.46) |
| Severe accelerated aging | 13.86(13.59, 14.13) | 1.08(0.98, 1.18) | 18.81(18.37, 19.25) |
| Mild accelerated aging | 9.02(8.80, 9.25) | 0.89(0.81, 0.98) | 16.24(15.83, 16.65) |
| Non-accelerated aging | 6.93(6.80, 7.06) | 0.69(0.65, 0.74) | 6.15(6.01, 6.28) |
| **PhenoAgeAccel category, HR(95%CI)** |  |  |  |
| Severe accelerated aging | 1(Reference) | 1(Reference) | 1(Reference) |
| Mild accelerated aging | 0.77(0.74, 0.79) | 1.02(0.93, 1.12) | 0.86(0.83,0.89) |
| Non-accelerated aging | 0.66(0.64, 0.68) | 0.88(0.81, 0.95) | 0.33(0.32,0.34) |
| **Life expectancy, 45 y** |  |  |  |
| Severe accelerated aging | 37.28(36.99, 37.56) | 49.27(48.42, 50.13) | 42.15(41.87, 42.43) |
| Mild accelerated aging | 41.20(40.89, 41.51) | 50.31(49.57, 51.05) | 43.05(42.78, 43.33) |
| Non-accelerated aging | 43.34(43.08, 43.60) | 51.33(50.75, 51.91) | 46.05(45.85, 46.25) |
| **Life expectancy, 65 y** |  |  |  |
| Severe accelerated aging | 20.10(19.87, 20.33) | 29.59(28.75, 30.42) | 24.96(24.76, 25.16) |
| Mild accelerated aging | 23.30(23.04, 23.56) | 30.56(29.83, 31.29) | 25.67(25.48, 25.87) |
| Non-accelerated aging | 25.09(24.86, 25.31) | 31.52(30.95, 32.10) | 28.03(27.87, 28.19) |
| **Years of life gained, 45 y** |  |  |  |
| Severe accelerated aging | Reference | Reference | Reference |
| Mild accelerated aging | 3.92(3.50, 4.34) | 1.04(-0.09, 2.17) | 0.91(0.51, 1.30) |
| Non-accelerated aging | 6.06(5.68, 6.45) | 2.06(1.03, 3.09) | 3.90(3.56, 4.25) |
| **Years of life gained, 65 y** |  |  |  |
| Severe accelerated aging | Reference | Reference | Reference |
| Mild accelerated aging | 3.20(2.85, 3.55) | 0.97(-0.13, 2.08) | 0.71(0.43, 0.99) |

Cox proportional hazards models: adjusted for gender (male, female), BMI (underweight and normal/overweight and obese), smoking status (current/former and never smoked), education (college degree/non-college degree), employment status (in paid employment or self-employed/not in paid), walking speed (normal speed and fast walking/slow walking), average household income (≥31,000/<31,000), and sleep duration (≤6h/≥7h) for UK Biobank; only adjusted for gender (male, female) for Chinese Cohort.

Table S18: Death rates per 1,000 person-years, hazard ratios, estimated and prolonged life expectancy at age 45 and 65 for participants with and without major chronic diseases from UK Biobank and participants with major chronic diseases from Chinese Cohort, after removal of participants with hypertension, cerebrovascular disease, and mental disorders at baseline.

|  | **UK Biobank** | | **Chinese Cohort** |
| --- | --- | --- | --- |
|  | **With Major chronic diseases** | **Without Major chronic diseases** | **With Major chronic diseases** |
|  | (n=65667) | (n=141595) | (n=231551) |
| **Number of Participants, %** |  |  |  |
| Severe accelerated aging | 13852(21.1) | 24298(17.1) | 41605(18.0) |
| Mild accelerated aging | 14856(22.7) | 30632(21.6) | 41772(18.0) |
| Non-accelerated aging | 36959(56.2) | 86665(61.3) | 148134(64.0) |
| **Mortality per 1000 person-years(95% Cl)** |  |  |  |
| Total | 7.54(7.37, 7.72) | 0.51(0.48, 0.54) | 9.94(9.79, 10.09) |
| Severe accelerated aging | 10.46(10.01, 10.92) | 0.72(0.63, 0.81) | 18.60(18.11, 19.11) |
| Mild accelerated aging | 7.77(7.41, 8.16) | 0.64(0.57, 0.71) | 16.06(15.61, 16.52) |
| Non-accelerated aging | 6.4(6.19, 6.61) | 0.4(0.37, 0.44) | 5.93(5.79, 6.08) |
| **PhenoAgeAccel category, HR(95%CI)** |  |  |  |
| Severe accelerated aging | 1(Reference) | 1(Reference) | 1(Reference) |
| Mild accelerated aging | 0.80(0.75, 0.86) | 1.07(0.96, 1.20) | 0.86(0.83,0.89) |
| Non-accelerated aging | 0.71(0.67, 0.75) | 0.84(0.76, 0.92) | 0.32(0.31,0.33) |
| **Life expectancy, 45 y** |  |  |  |
| Severe accelerated aging | 42.45(41.88, 43.03) | 51.36(50.58, 52.13) | 41.96(41.65, 42.28) |
| Mild accelerated aging | 45.16(44.64, 45.68) | 51.87(51.20, 52.54) | 43.03(42.72, 43.33) |
| Non-accelerated aging | 46.70(46.31, 47.08) | 53.00(52.57, 53.43) | 46.02(45.81, 46.24) |
| **Life expectancy, 65 y** |  |  |  |
| Severe accelerated aging | 25.40(24.91, 25.88) | 31.60(30.85, 32.35) | 41.96(41.65, 42.28) |
| Mild accelerated aging | 27.48(27.05, 27.92) | 32.08(31.42, 32.73) | 43.03(42.72, 43.33) |
| Non-accelerated aging | 28.67(28.34, 29.00) | 33.13(32.71, 33.55) | 46.02(45.81, 46.24) |
| **Years of life gained, 45 y** |  |  |  |
| Severe accelerated aging | Reference | Reference | Reference |
| Mild accelerated aging | 2.71(1.93, 3.49) | 0.51(-0.51, 1.54) | 1.07(0.63, 1.50) |
| Non-accelerated aging | 4.25(3.55, 4.94) | 1.64(0.76, 2.53) | 4.06(3.68, 4.45) |
| **Years of life gained, 65 y** |  |  |  |
| Severe accelerated aging | Reference | Reference | Reference |
| Mild accelerated aging | 2.09(1.44, 2.73) | 0.48(-0.52, 1.48) | 0.85(0.52, 1.17) |

Cox proportional hazards models: adjusted for gender (male, female), BMI (underweight and normal/overweight and obese), smoking status (current/former and never smoked), education (college degree/non-college degree), employment status (in paid employment or self-employed/not in paid), walking speed (normal speed and fast walking/slow walking), average household income (≥31,000/<31,000), and sleep duration (≤6h/≥7h) for UK Biobank; only adjusted for gender (male, female) for Chinese Cohort.

Table S19: Death rates per 1,000 person-years, hazard ratios, estimated and prolonged life expectancy at age 45 and 65 for participants with and without major chronic diseases from UK Biobank and participants with major chronic diseases from Chinese Cohort, after excluding participants who died in the first year of follow-up.

|  | **UK Biobank** | | **Chinese Cohort** |
| --- | --- | --- | --- |
|  | **With Major chronic diseases** | **Without Major chronic diseases** | **With Major chronic diseases** |
|  | (n=201477) | (n=153194) | (n=332895) |
| **Number of Participants, %** |  |  | 63487(19.1) |
| Severe accelerated aging | 52511(26.1) | 27108(17.6) | 63487(19.1) |
| Mild accelerated aging | 46566(23.1) | 33310(21.8) | 205921(61.8) |
| Non-accelerated aging | 102400(50.8) | 92776(60.6) |  |
| **Mortality per 1000 person-years(95% Cl)** |  |  |  |
| Total | 9.94(9.83, 10.05) | 0.66(0.62, 0.69) | 13.66(13.51, 13.82) |
| Severe accelerated aging | 14.81(14.54, 15.1) | 1.02(0.93, 1.13) | 26.23(25.73, 26.74) |
| Mild accelerated aging | 9.79(9.56, 10.03) | 0.75(0.68, 0.83) | 20.90(20.46, 21.35) |
| Non-accelerated aging | 7.63(7.50, 7.78) | 0.52(0.48, 0.56) | 7.90(7.75, 8.05) |
| **PhenoAgeAccel category, HR(95%CI)** |  |  |  |
| Severe accelerated aging | 1(Reference) | 1(Reference) | 1(Reference) |
| Mild accelerated aging | 0.75(0.73, 0.78) | 0.97(0.88, 1.07) | 0.79(0.77,0.82) |
| Non-accelerated aging | 0.65(0.64, 0.67) | 0.79(0.72, 0.86) | 0.31(0.30,0.32) |
| **Life expectancy, 45 y** |  |  |  |
| Severe accelerated aging | 38.65(38.34, 38.96) | 50.96(50.31, 51.60) | 37.89(37.61, 38.18) |
| Mild accelerated aging | 42.77(42.46, 43.09) | 52.08(51.58, 52.58) | 40.01(39.73, 40.29) |
| Non-accelerated aging | 44.88(44.63, 45.14) | 52.99(52.66, 53.32) | 44.22(44.02, 44.41) |
| **Life expectancy, 65 y** |  |  |  |
| Severe accelerated aging | 21.56(21.31, 21.82) | 31.37(30.75, 31.98) | 22.21(22.02, 22.41) |
| Mild accelerated aging | 24.90(24.63, 25.16) | 32.37(31.90, 32.85) | 23.81(23.62, 24.00) |
| Non-accelerated aging | 26.63(26.41, 26.85) | 33.19(32.87, 33.51) | 26.98(26.83, 27.13) |
| **Years of life gained, 45 y** |  |  |  |
| Severe accelerated aging | Reference | Reference | Reference |
| Mild accelerated aging | 4.12(3.68, 4.56) | 1.13(0.31, 1.94) | 2.12(1.72, 2.51) |
| Non-accelerated aging | 6.23(5.83, 6.63) | 2.03(1.31, 2.76) | 6.32(5.98, 6.67) |
| **Years of life gained, 65 y** |  |  |  |
| Severe accelerated aging | Reference | Reference | Reference |
| Mild accelerated aging | 3.34(2.97, 3.70) | 1.01(0.23, 1.79) | 1.60(1.33, 1.87) |

Cox proportional hazards models: adjusted for gender (male, female), BMI (underweight and normal/overweight and obese), smoking status (current/former and never smoked), education (college degree/non-college degree), employment status (in paid employment or self-employed/not in paid), walking speed (normal speed and fast walking/slow walking), average household income (≥31,000/<31,000), and sleep duration (≤6h/≥7h) for UK Biobank; only adjusted for gender (male, female) for Chinese Cohort.

Table S20: Death rates per 1,000 person-years, hazard ratios, estimated and prolonged life expectancy at age 45 and 65 for participants with and without major chronic diseases from UK Biobank and participants with major chronic diseases from Chinese Cohort, after shortening the follow-up period to 15.0 years for UK Biobank and 10.0 years for Chinese Cohort.

|  | **UK Biobank** | | **Chinese Cohort** |
| --- | --- | --- | --- |
|  | **With Major chronic diseases** | **Without Major chronic diseases** | **With Major chronic diseases** |
|  | （n=95423) | (n=58383) | （n=248884) |
| **Number of Participants, %** |  |  |  |
| Severe accelerated aging | 28288(29.6) | 11472(19.6) | 47507(19.1) |
| Mild accelerated aging | 22169(23.2) | 13199(22.6) | 46990(18.9) |
| Non-accelerated aging | 44966(47.2) | 33712(57.8) | 154387(62.0) |
| **Mortality per 1000 person-years(95% Cl)** |  |  |  |
| Total | 22.15(21.89, 22.41) | 1.52(1.44, 1.61) | 15.04(14.84, 15.24) |
| Severe accelerated aging | 28.95(28.39, 29.51) | 2.09(1.87, 2.32) | 26.95(26.34, 27.57) |
| Mild accelerated aging | 21.57(21.05, 22.11) | 1.7(1.52, 1.9) | 23.44(22.88, 24.03) |
| Non-accelerated aging | 18.42(18.08, 18.77) | 1.26(1.16, 1.36) | 9.00(8.81, 9.20) |
| **PhenoAgeAccel category, HR(95%CI)** |  |  |  |
| Severe accelerated aging | 1(Reference) | 1(Reference) | 1(Reference) |
| Mild accelerated aging | 0.81(0.78,0.84) | 0.90(0.77,1.04) | 0.87(0.84,0.90) |
| Non-accelerated aging | 0.75(0.73,0.77) | 0.73(0.64,0.84) | 0.33(0.32,0.34) |
| **Life expectancy, 45 y** |  |  |  |
| Severe accelerated aging | 31.12(30.83, 31.40) | 47.44(46.29, 48.59) | 38.74(38.43, 39.06) |
| Mild accelerated aging | 34.04(33.71, 34.37) | 48.81(47.79, 49.84) | 39.39(39.08, 39.71) |
| Non-accelerated aging | 35.57(35.28, 35.86) | 50.34(49.56, 51.11) | 42.28(42.03, 42.53) |
| **Life expectancy, 65 y** |  |  |  |
| Severe accelerated aging | 15.40(15.22, 15.58) | 28.23(27.13, 29.32) | 22.09(21.87, 22.31) |
| Mild accelerated aging | 17.54(17.3, 17.78) | 29.45(28.47, 30.42) | 22.60(22.38, 22.83) |
| Non-accelerated aging | 18.71(18.49, 18.93) | 30.80(30.05, 31.55) | 24.90(24.70, 25.10) |
| **Years of life gained, 45 y** |  |  |  |
| Severe accelerated aging | Reference | Reference | Reference |
| Mild accelerated aging | 2.93(2.49, 3.36) | 1.38(-0.16, 2.92) | 0.65(0.20, 1.09) |
| Non-accelerated aging | 4.45(4.05, 4.86) | 2.90(1.52, 4.28) | 3.54(3.14, 3.94) |
| **Years of life gained, 65 y** |  |  |  |
| Severe accelerated aging | Reference | Reference | Reference |
| Mild accelerated aging | 2.14(1.84, 2.44) | 1.22(-0.25, 2.69) | 0.51(0.19, 0.83) |

Cox proportional hazards models: adjusted for gender (male, female), BMI (underweight and normal/overweight and obese), smoking status (current/former and never smoked), education (college degree/non-college degree), employment status (in paid employment or self-employed/not in paid), walking speed (normal speed and fast walking/slow walking), average household income (≥31,000/<31,000), and sleep duration (≤6h/≥7h) for UK Biobank; only adjusted for gender (male, female) for Chinese Cohort.

Table S21: Death rates per 1,000 person-years, hazard ratios, estimated and prolonged life expectancy at age 45 and 65 for participants with and without major chronic diseases from UK Biobank after removal of missing covariate data.

|  | **With Major chronic diseases** | **Without Major chronic diseases** |
| --- | --- | --- |
|  | (n=134290) | (n=121526) |
| **Number of Participants, %** |  |  |
| Severe accelerated aging | 32652(24.4) | 21031(17.3) |
| Mild accelerated aging | 30958(23.0) | 26473(21.7) |
| Non-accelerated aging | 70680(52.6) | 74022(61.0) |
| **Mortality per 1000 person-years(95% Cl)** |  |  |
| Total | 8.02(7.90, 8.15) | 0.54(0.51, 0.58) |
| Severe accelerated aging | 11.51(11.21, 11.82) | 0.77(0.68, 0.87) |
| Mild accelerated aging | 8.00(7.74, 8.27) | 0.64(0.57, 0.73) |
| Non-accelerated aging | 6.48(6.33, 6.63) | 0.44(0.40, 0.48) |
| **PhenoAgeAccel category, HR(95%CI)** |  |  |
| Severe accelerated aging | 1(Reference) | 1(Reference) |
| Mild accelerated aging | 0.78(0.75, 0.82) | 1.03(0.92, 1.16) |
| Non-accelerated aging | 0.70(0.67, 0.73) | 0.84(0.76, 0.93) |
| **Life expectancy, 45 y** |  |  |
| Severe accelerated aging | 40.37(39.96, 40.78) | 51.28(50.58, 51.98) |
| Mild accelerated aging | 43.82(43.42, 44.23) | 52.19(51.63, 52.75) |
| Non-accelerated aging | 45.54(45.21, 45.86) | 53.11(52.75, 53.48) |
| **Life expectancy, 65 y** |  |  |
| Severe accelerated aging | 22.87(22.51, 23.23) | 31.63(30.96, 32.31) |
| Mild accelerated aging | 25.70(25.34, 26.05) | 32.45(31.92, 32.99) |
| Non-accelerated aging | 27.11(26.82, 27.41) | 33.29(32.94, 33.64) |
| **Years of life gained, 45 y** |  |  |
| Severe accelerated aging | Reference | Reference |
| Mild accelerated aging | 3.45(2.87, 4.03) | 0.91(0.01, 1.81) |
| Non-accelerated aging | 5.17(4.64, 5.69) | 1.83(1.04, 2.63) |
| **Years of life gained, 65 y** |  |  |
| Severe accelerated aging | Reference | Reference |
| Mild accelerated aging | 2.83(2.32, 3.33) | 0.82(-0.04, 1.68) |
| Non-accelerated aging | 4.25(3.78, 4.71) | 1.66(0.89, 2.42) |

Cox proportional hazards models adjusted for gender (male, female), BMI (underweight and normal/overweight and obese), smoking status (current/former and never smoked), education (college degree/non-college degree), employment status (In paid employment or self-employed/Not in paid), walking speed (normal speed and fast walking/slow walking), average household income (≥31, 000/<31, 000), and sleep duration (≤6h/≥7h) for UK Biobank.

Table S22: Death rates per 1,000 person-years, hazard ratios, estimated and prolonged life expectancy at age 45 and 65 for participants with and without major chronic diseases from UK Biobank after filling in missing aging data.

|  | **With Major chronic diseases** | **Without Major chronic diseases** |
| --- | --- | --- |
|  | (n=209523) | (n=160528) |
| **Number of Participants, %** |  |  |
| Severe accelerated aging | 51354(24.6) | 26681(16.6) |
| Mild accelerated aging | 45838(21.8) | 32746(20.4) |
| Non-accelerated aging | 112331(53.6) | 100831(63.0) |
| **Mortality per 1000 person-years(95% Cl)** |  |  |
| Total | 9.66(9.55, 9.77) | 0.62(0.59, 0.65) |
| Severe accelerated aging | 14.41(14.13, 14.69) | 0.93(0.84, 1.03) |
| Mild accelerated aging | 9.62(9.39, 9.86) | 0.72(0.65, 0.80) |
| Non-accelerated aging | 7.60(7.47, 7.74) | 0.51(0.47, 0.54) |
| **PhenoAgeAccel category, HR(95%CI)** |  |  |
| Severe accelerated aging | 1(Reference) | 1(Reference) |
| Mild accelerated aging | 0.77(0.75, 0.80) | 1.00(0.90, 1.10) |
| Non-accelerated aging | 0.67(0.65, 0.69) | 0.83(0.76, 0.91) |
| **Life expectancy, 45 y** |  |  |
| Severe accelerated aging | 38.91(38.60, 39.22) | 51.04(50.37, 51.70) |
| Mild accelerated aging | 42.87(42.56, 43.19) | 52.01(51.48, 52.54) |
| Non-accelerated aging | 44.95(44.70, 45.19) | 52.92(52.57, 53.27) |
| **Life expectancy, 65 y** |  |  |
| Severe accelerated aging | 21.56(21.31, 21.82) | 31.39(30.75, 32.03) |
| Mild accelerated aging | 24.82(24.55, 25.09) | 32.27(31.76, 32.78) |
| Non-accelerated aging | 26.55(26.33, 26.76) | 33.10(32.76, 33.44) |
| **Years of life gained, 45 y** |  |  |
| Severe accelerated aging | Reference | Reference |
| Mild accelerated aging | 3.96(3.52, 4.40) | 0.97(0.12, 1.82) |
| Non-accelerated aging | 6.04(5.64, 6.43) | 1.88(1.13, 2.63) |
| **Years of life gained, 65 y** |  |  |
| Severe accelerated aging | Reference | Reference |
| Mild accelerated aging | 3.26(2.88, 3.63) | 0.88(0.06, 1.70) |
| Non-accelerated aging | 4.98(4.64, 5.32) | 1.71(0.98, 2.43) |

Cox proportional hazards models adjusted for gender (male, female), BMI (underweight and normal/overweight and obese), smoking status (current/former and never smoked), education (college degree/non-college degree), employment status (In paid employment or self-employed/Not in paid), walking speed (normal speed and fast walking/slow walking), average household income (≥31, 000/<31, 000), and sleep duration (≤6h/≥7h) for UK Biobank.

Table S23: PhenoAgeAccel values across Waves in distinct k-means clusters of PhenoAgeAccel trajectories, for participants from the Chinese Cohort included in the focused analysis.

|  | **W1** | **W2** | **W3** |
| --- | --- | --- | --- |
| **Total** |  |  |  |
| High-stability | 11.27 | 13.13 | 19.34 |
| Moderate-stability | 3.67 | 1.53 | 1.26 |
| Low-stability | -8.43 | -8.55 | -8.08 |
| **Men** |  |  |  |
| High-stability | 11.70 | 13.38 | 19.16 |
| Moderate-stability | 3.56 | 1.74 | 1.73 |
| Low-stability | -8.10 | -8.27 | -7.73 |
| **Women** |  |  |  |
| High-stability | 10.91 | 12.86 | 19.60 |
| Moderate-stability | 3.87 | 1.40 | 0.78 |
| Low-stability | -8.66 | -8.75 | -8.33 |

Table S24: Death rates per 1,000 person-years, hazard ratios, and estimated as well as prolonged life expectancy at 45 and 65 years of age across distinct k-means clusters of PhenoAgeAccel trajectories, for participants from the Chinese Cohort included in the focused analysis.

|  | **Total** | **man** | **woman** |
| --- | --- | --- | --- |
|  | （n=16991) | （n=8760) | （n=8231) |
| **Number of Participants, %** |  |  |  |
| High-stability | 2052(12.1) | 1048(12.0) | 994(12.1) |
| Moderate-stability | 7967(46.9) | 4244(48.4) | 3678(44.7) |
| Low-stability | 6972(41.0) | 3468(39.6) | 3559(43.2) |
| **Mortality per 1000 person-years(95% Cl)** |  |  |  |
| Total | 24.90(24.09, 25.74) | 24.90(24.09, 25.74) | 22.72(21.62, 23.88) |
| High-stability | 48.21(44.87, 51.79) | 48.21(44.87, 51.79) | 46.51(41.89, 51.62) |
| Moderate-stability | 32.23(30.88, 33.64) | 32.23(30.88, 33.64) | 30.35(28.45, 32.38) |
| Low-stability | 11.03(10.21, 11.92) | 11.03(10.21, 11.92) | 9.50(8.45, 10.66) |
| **PhenoAgeAccel category, HR(95%CI)** |  |  |  |
| High-stability | 1(Reference) | 1(Reference) | 1(Reference) |
| Moderate-stability | 0.66(0.61, 0.72) | 0.67(0.59, 0.75) | 0.65(0.57, 0.73) |
| Low-stability | 0.22(0.20, 0.25) | 0.25(0.22, 0.29) | 0.20(0.17, 0.23) |
| **Life expectancy, 45 y** |  |  |  |
| High-stability | 29.82(28.53, 31.11) | 29.11(27.40, 30.82) | 31.13(29.24, 33.02) |
| Moderate-stability | 34.76(33.88, 35.64) | 33.72(32.57, 34.88) | 36.40(35.11, 37.70) |
| Low-stability | 42.60(41.74, 43.45) | 39.97(38.72, 41.23) | 44.71(43.59, 45.82) |
| **Life expectancy, 65 y** |  |  |  |
| High-stability | 16.95(16.19, 17.72) | 16.45(15.39, 17.51) | 17.58(16.48, 18.68) |
| Moderate-stability | 20.58(20.10, 21.05) | 19.83(19.18, 20.49) | 21.50(20.80, 22.19) |
| Low-stability | 26.26(25.66, 26.85) | 24.38(23.47, 25.29) | 27.60(26.83, 28.38) |
| **Years of life gained, 45 y** |  |  |  |
| High-stability | Reference | Reference | Reference |
| Moderate-stability | 4.94(3.38, 6.51) | 4.62(2.56, 6.68) | 5.27(2.99, 7.56) |
| Low-stability | 12.78(11.23, 14.33) | 10.86(8.74, 12.99) | 13.58(11.39, 15.77) |
| **Years of life gained, 65 y** |  |  |  |
| High-stability | Reference | Reference | Reference |
| Moderate-stability | 3.62(2.72, 4.52) | 3.39(2.14, 4.63) | 3.91(2.62, 5.21) |
| Low-stability | 9.30(8.33, 10.27) | 7.93(6.53, 9.33) | 10.02(8.68, 11.36) |

Cox proportional hazards models for the Chinese Cohort included in the focused analysis.

Table S25: Death rates per 1,000 person-years, hazard ratios, and estimated as well as prolonged life expectancy at 45 and 65 years of age across tertile groups of cuPhenoAgeAccel, for participants from the Chinese Cohort included in the focused analysis.

|  | **Total** | **man** | **woman** |
| --- | --- | --- | --- |
|  | （n=16991) | （n=8760) | （n=8231) |
| **Number of Participants, %** | 5664(33.3) | 2920(33.3) | 2744(33.3) |
| Tertile 1 | 5664(33.3) | 2920(33.3) | 2744(33.3) |
| Tertile 2 | 5663(33.3) | 2920(33.3) | 2743(33.3) |
| Tertile 3 |  |  |  |
| **Mortality per 1000 person-years(95% Cl)** |  |  |  |
| Total | 24.90(24.09, 25.74) | 27.01(25.83, 28.24) | 22.72(21.62, 23.88) |
| Tertile 1 | 40.78(38.95, 42.69) | 41.60(39.04, 44.32) | 38.95(36.41, 41.65) |
| Tertile 2 | 26.01(24.56, 27.53) | 30.17(28.01, 32.50) | 22.59(20.70, 24.65) |
| Tertile 3 | 9.80(8.96, 10.72) | 11.08(9.84, 12.48) | 8.52(7.41, 9.78) |
| **PhenoAgeAccel category, HR(95%CI)** |  |  |  |
| Tertile 1 | 1(Reference) | 1(Reference) | 1(Reference) |
| Tertile 2 | 0.64(0.59, 0.69) | 0.73(0.66, 0.81) | 0.58(0.52, 0.64) |
| Tertile 3 | 0.23(0.21, 0.26) | 0.26(0.23, 0.30) | 0.21(0.18, 0.25) |
| **Life expectancy, 45 y** |  |  |  |
| Tertile 1 | 32.12(31.14, 33.11) | 31.48(30.18, 32.78) | 33.63(32.2, 35.07) |
| Tertile 2 | 36.35(35.4, 37.29) | 33.87(32.59, 35.15) | 38.89(37.56, 40.22) |
| Tertile 3 | 43.56(42.65, 44.47) | 41.65(40.33, 42.97) | 45.36(44.14, 46.57) |
| **Life expectancy, 65 y** |  |  |  |
| Tertile 1 | 18.67(18.14, 19.2) | 18.3(17.57, 19.04) | 19.4(18.64, 20.16) |
| Tertile 2 | 21.75(21.18, 22.32) | 20.05(19.26, 20.83) | 23.3(22.5, 24.11) |
| Tertile 3 | 26.96(26.32, 27.6) | 25.66(24.71, 26.61) | 28.05(27.2, 28.91) |
| **Years of life gained, 45 y** |  |  |  |
| Tertile 1 | Reference | Reference | Reference |
| Tertile 2 | 4.22(2.85,5.59) | 2.39(0.57,4.22) | 5.26(3.3,7.21) |
| Tertile 3 | 11.44(10.09,12.78) | 10.17(8.32,12.02) | 11.72(9.84,13.6) |
| **Years of life gained, 65 y** |  |  |  |
| Tertile 1 | Reference | Reference | Reference |
| Tertile 2 | 3.08(2.31,3.86) | 1.75(0.67,2.82) | 3.9(2.8,5.01) |
| Tertile 3 | 8.29(7.46,9.12) | 7.36(6.16,8.56) | 8.65(7.51,9.8) |

Cox proportional hazards models for the Chinese Cohort included in the focused analysis.


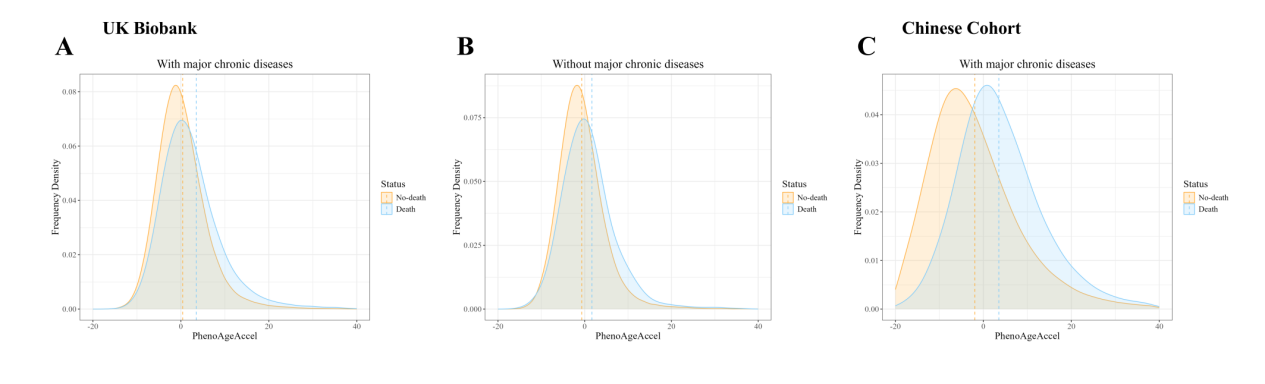


**Figure S1: Distribution of PhenoAgeAccel across different disease states in UK Biobank (participants with and without major chronic diseases) and Chinese Cohort (participants with major chronic diseases).**

A: With major chronic diseases (UK Biobank)

B: Without major chronic diseases (UK Biobank)

C: With major chronic diseases (Chinese Cohort)


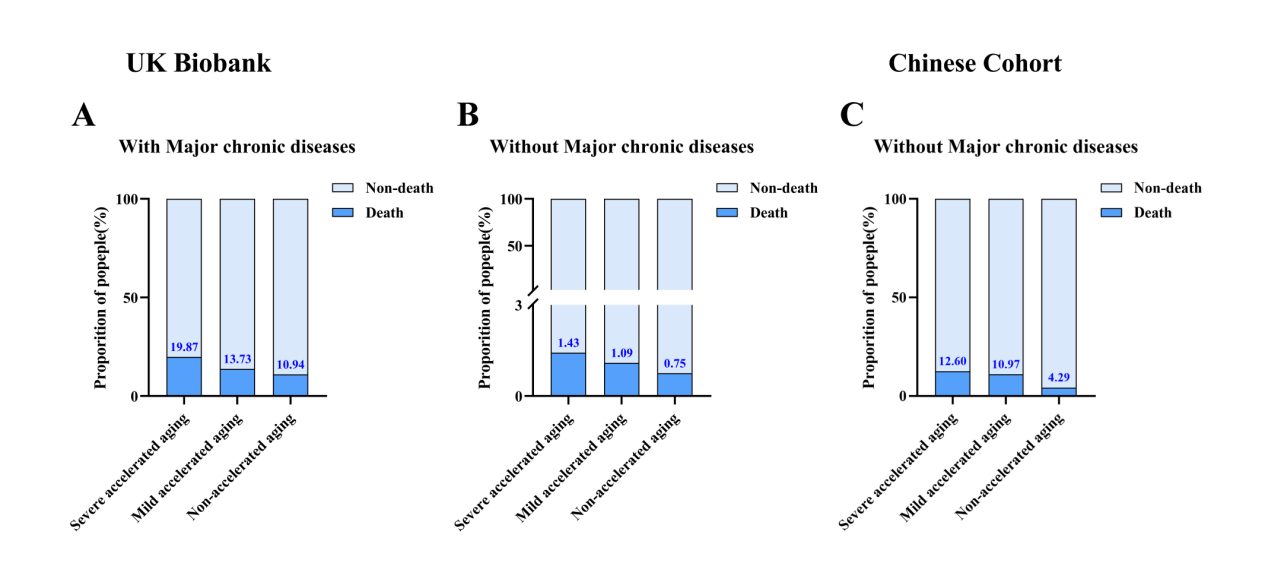


**Figure S2: Association between mortality and different PhenoAgeAccel phenotypes in participants with and without major chronic diseases from UK Biobank and participants with major chronic diseases from Chinese Cohort.**

A: With major chronic diseases (UK Biobank)

B: Without major chronic diseases (UK Biobank)

C: With major chronic diseases (Chinese Cohort)


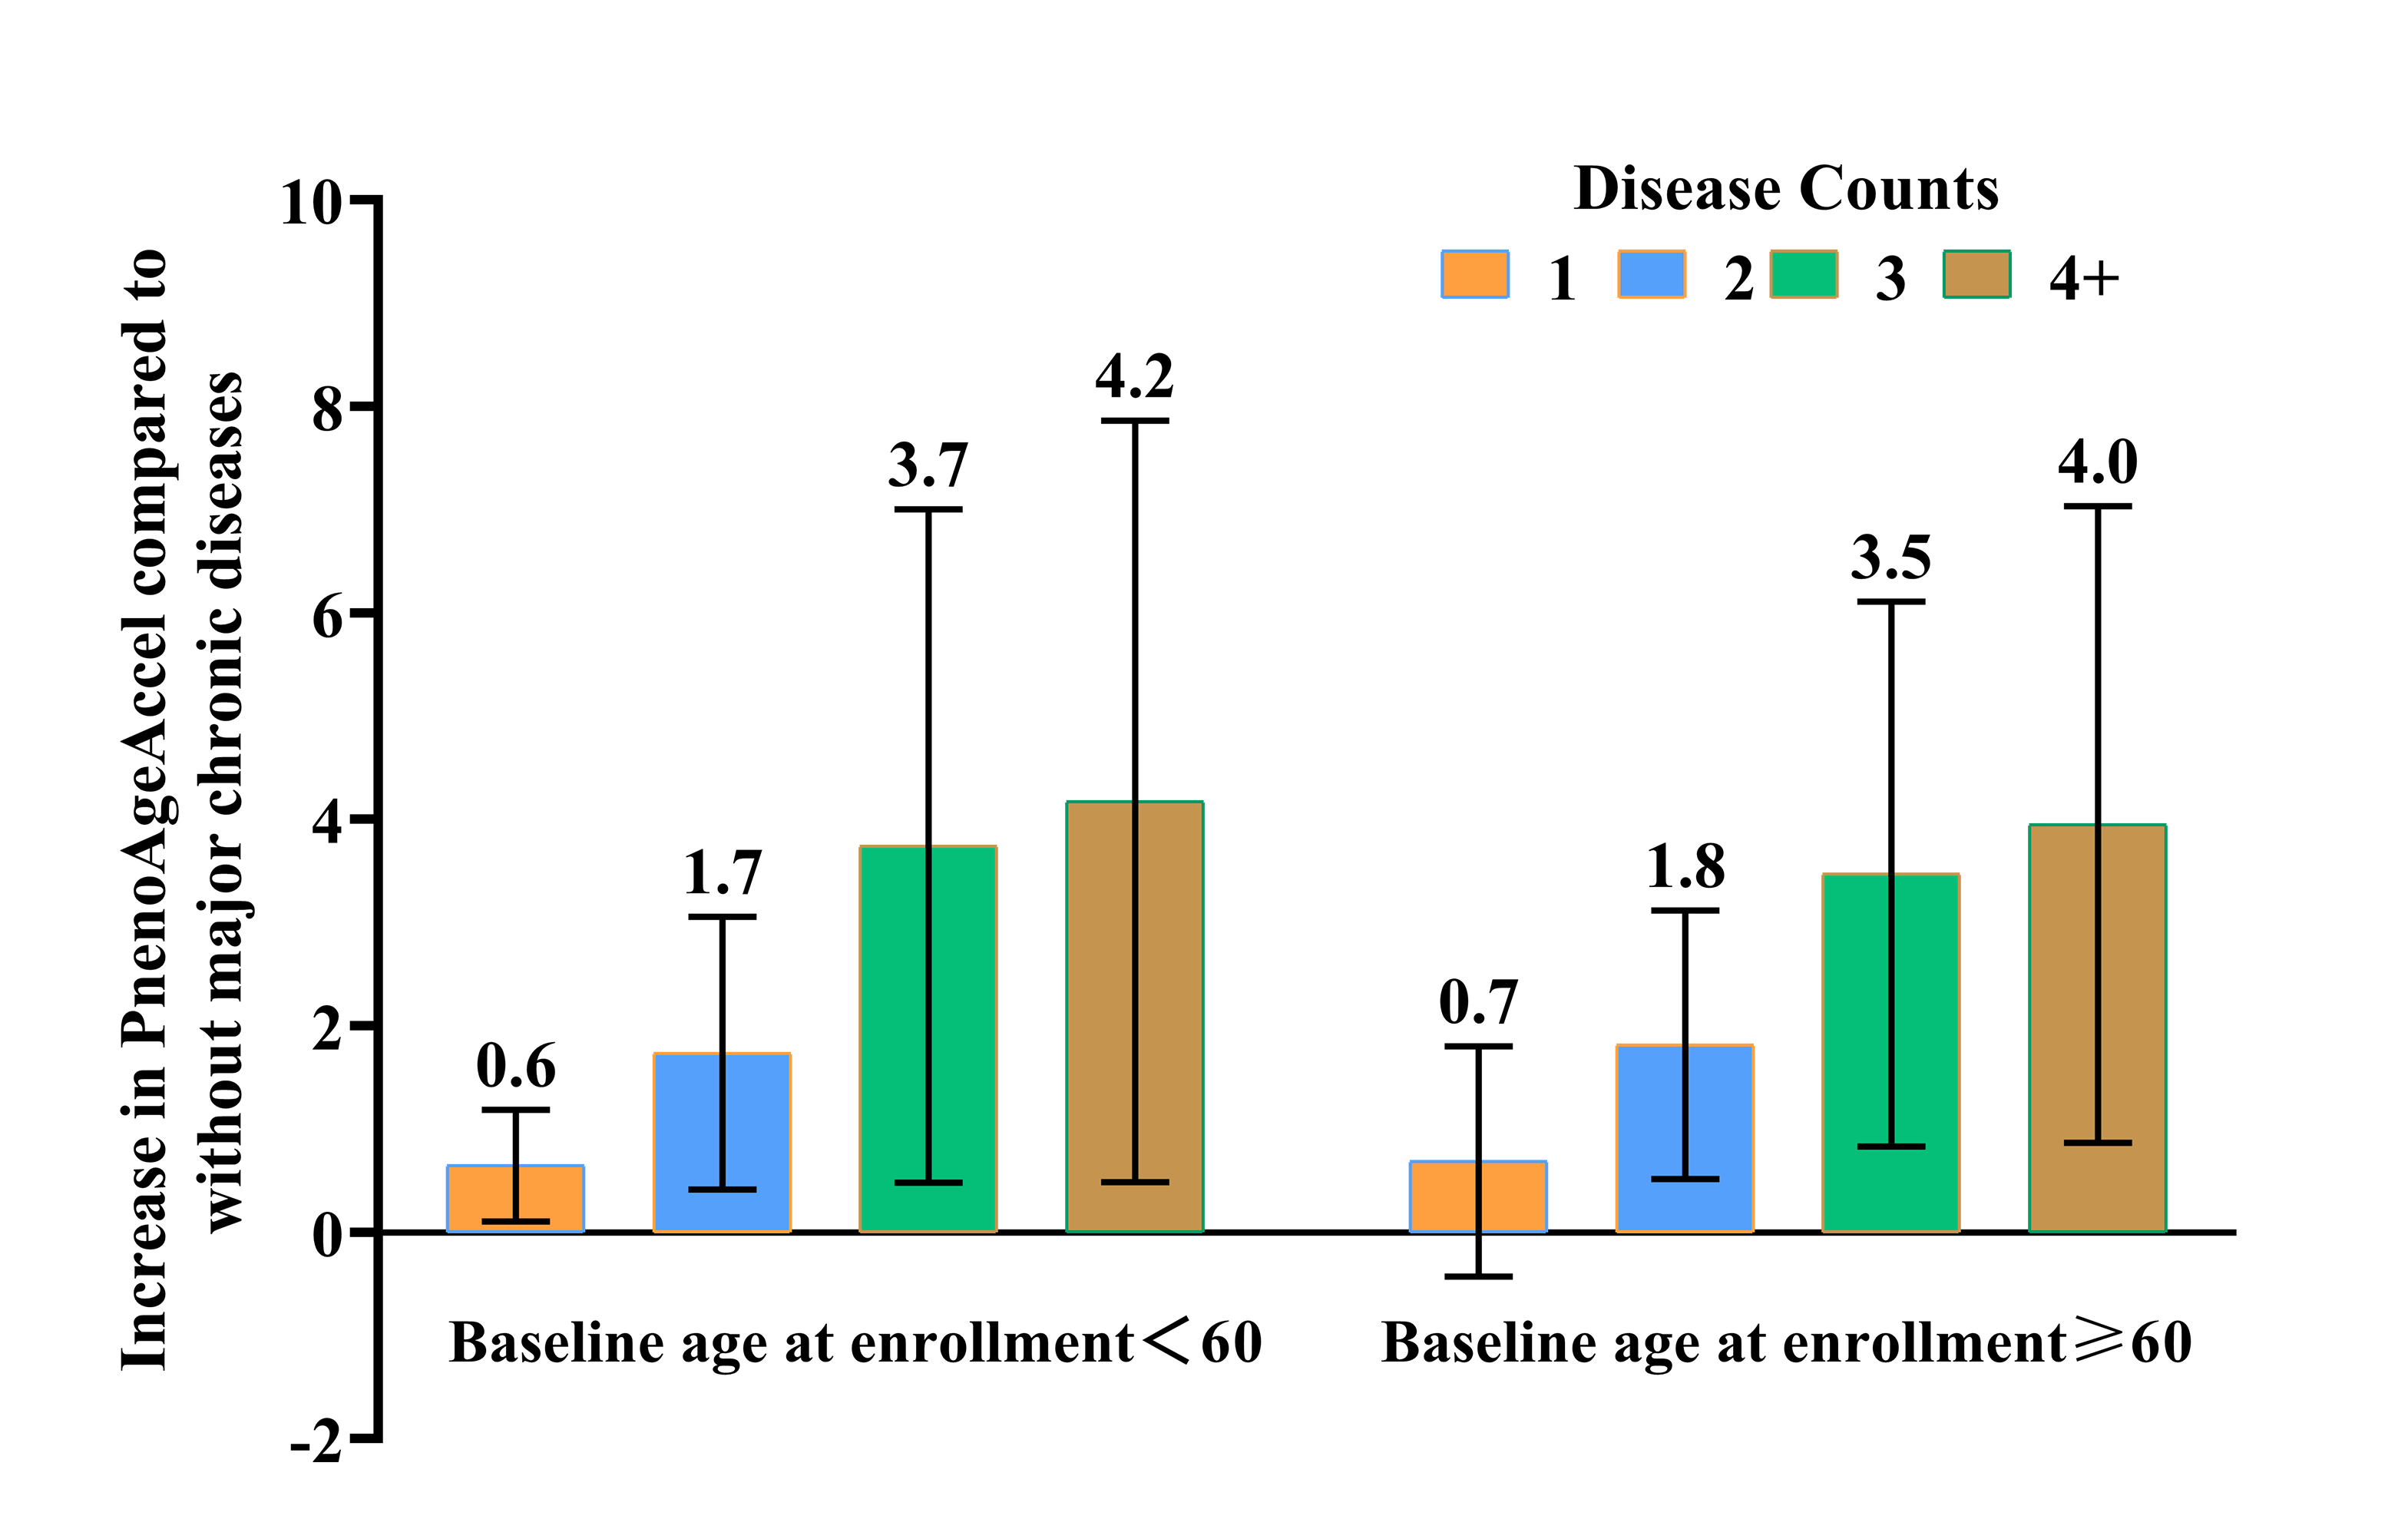


**Figure S3: Predicted increase in PhenoAgeAccel for each disease count by age category in UK Biobank.** The y-axis depicts the increase in PhenoAgeAccel compared to persons who were disease-free. The x-axis shows groups categorized based on chronological age and the number of diseases each participant had.


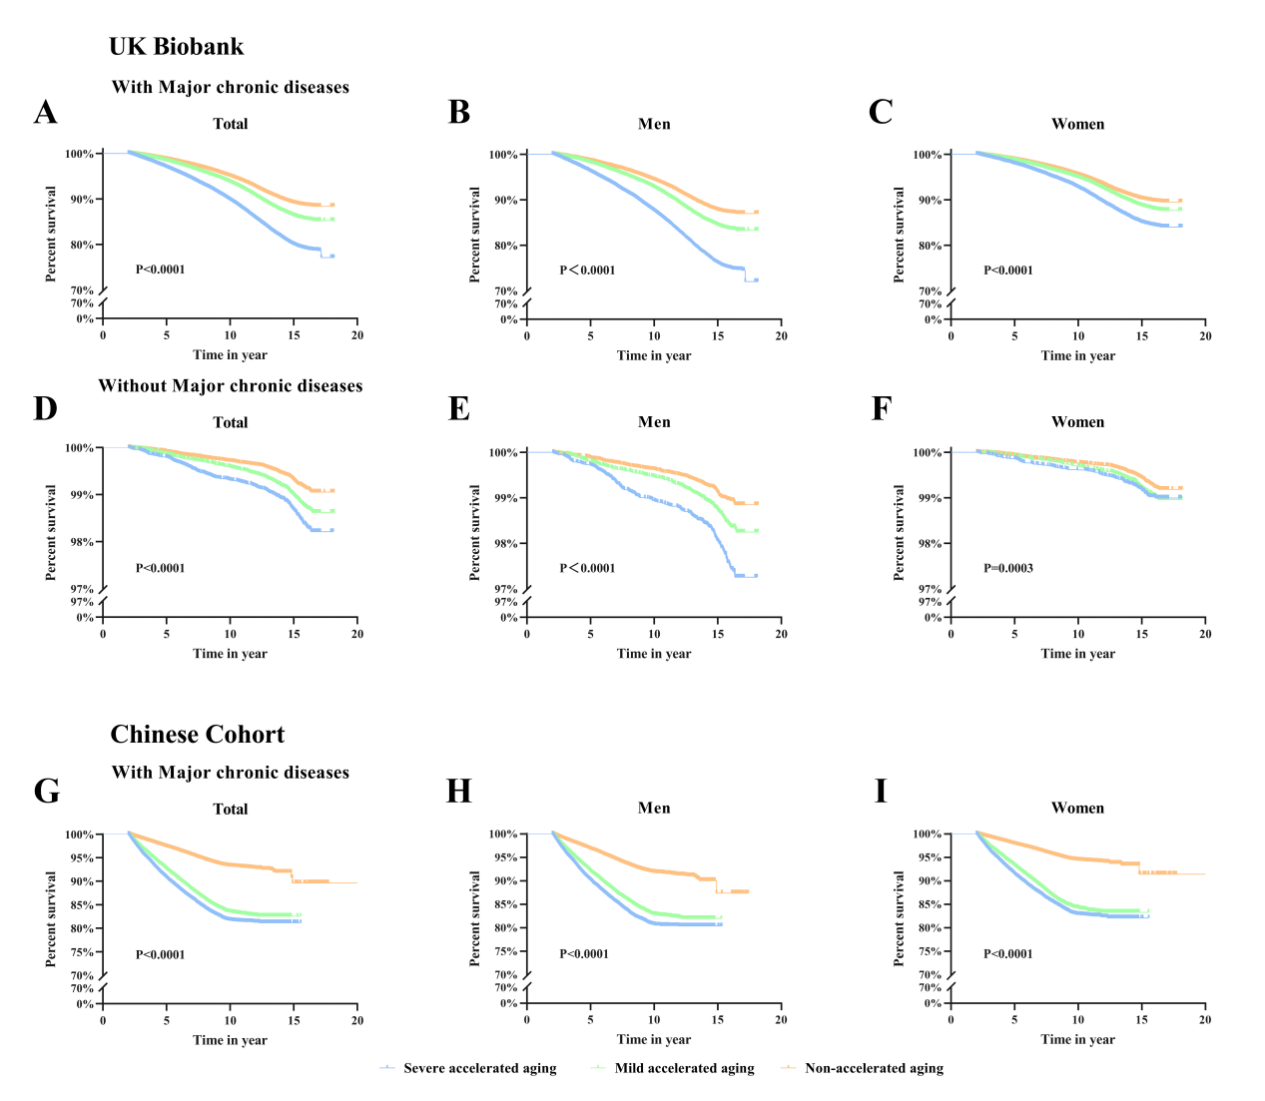


**Figure S4: Standardized cumulative survival of participants with different PhenoAgeAccel phenotypes from UK Biobank (with and without major chronic diseases) and Chinese Cohort (with major chronic diseases).**

A, B, C: With major chronic diseases (UK Biobank)

D, E, F: Without major chronic diseases (UK Biobank)

G, H, I: With major chronic diseases (Chinese Cohort)


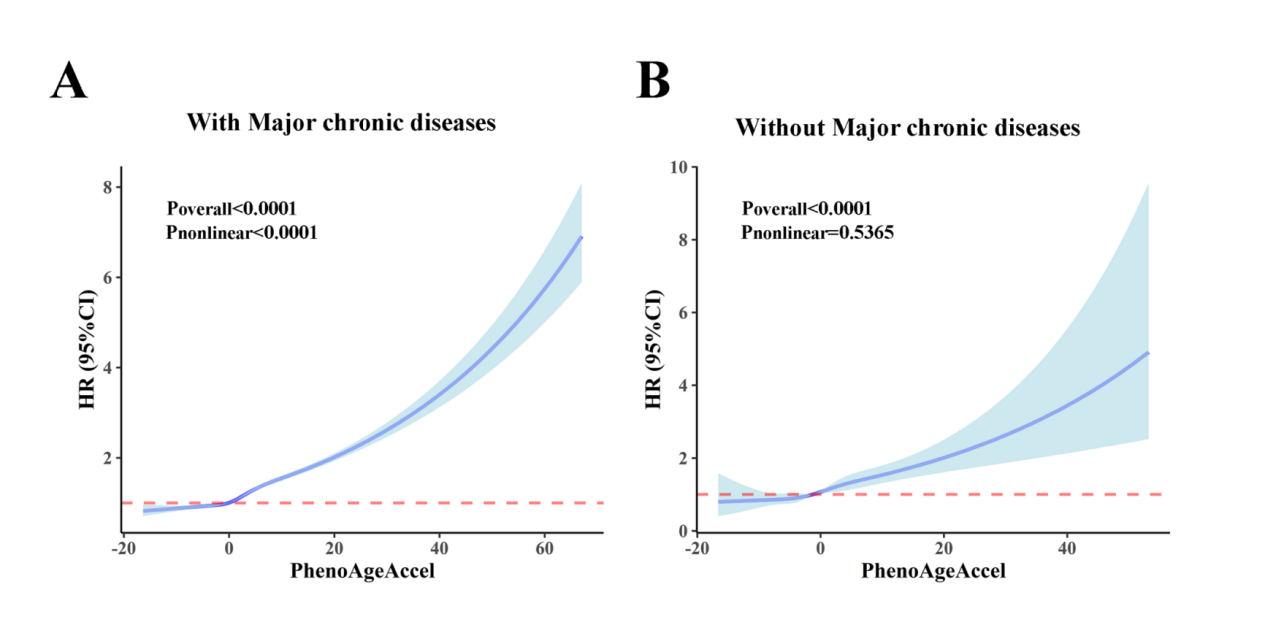


**Figure S5: Linear and nonlinear relationships between phenotypic age acceleration (PhenoAgeAccel) and risk of death in patients with and without major chronic diseases in UK Biobank.**

Adjusted for gender (male, female), BMI (underweight and normal/overweight and obese), smoking status (current/former and never smoked), education (college degree/non-college degree), employment status (In paid employment or self-employed/Not in paid), walking speed (normal speed and fast walking/slow walking), average household income (≥31, 000/<31, 000), and sleep duration (≤6h/≥7h) for UK Biobank..

**
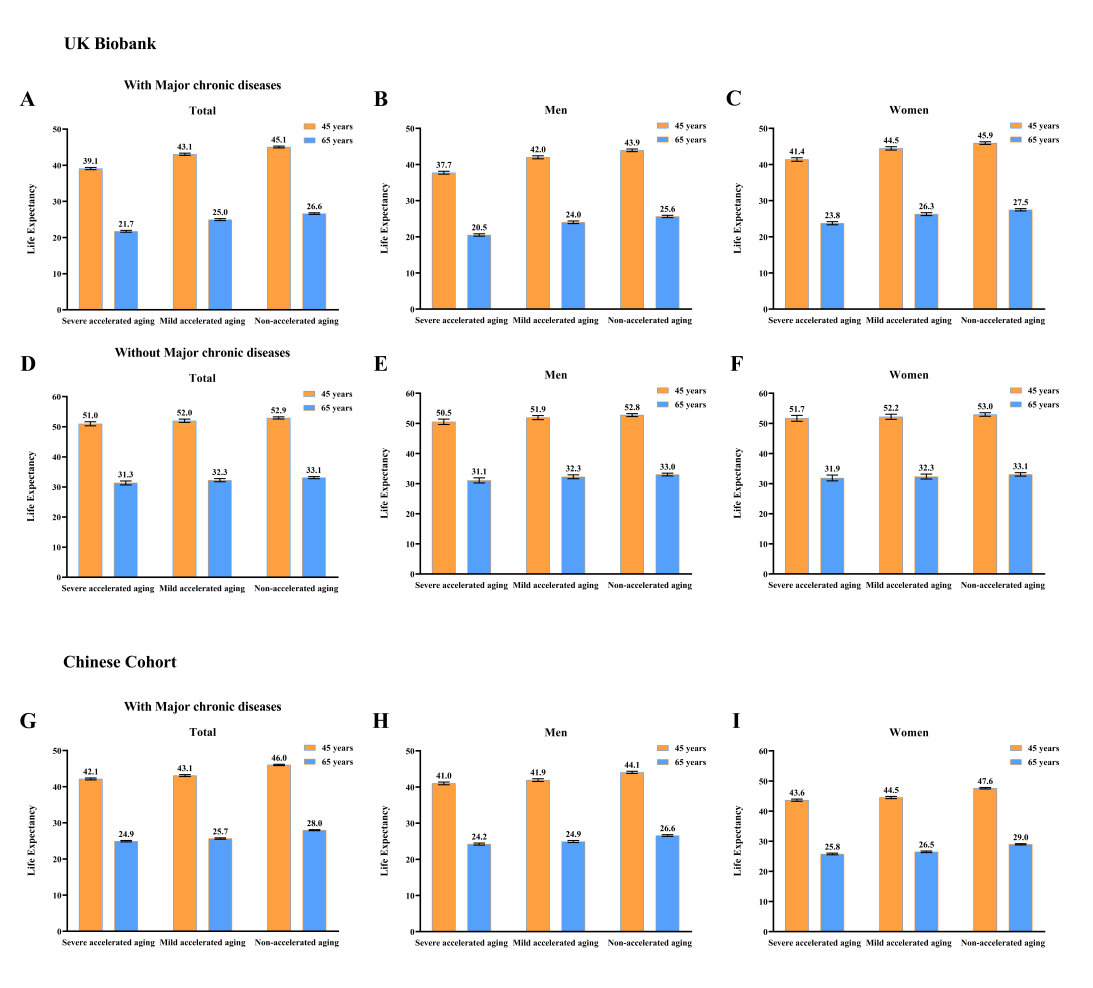
**

**Figure S6:Estimated life expectancy at age 45 for participants with and without major chronic diseases from UK Biobank and participants with major chronic diseases from Chinese Cohort.**

A, B, C: With major chronic diseases (UK Biobank)

D, E, F: Without major chronic diseases (UK Biobank)

G, H, I: With major chronic diseases (Chinese Cohort)


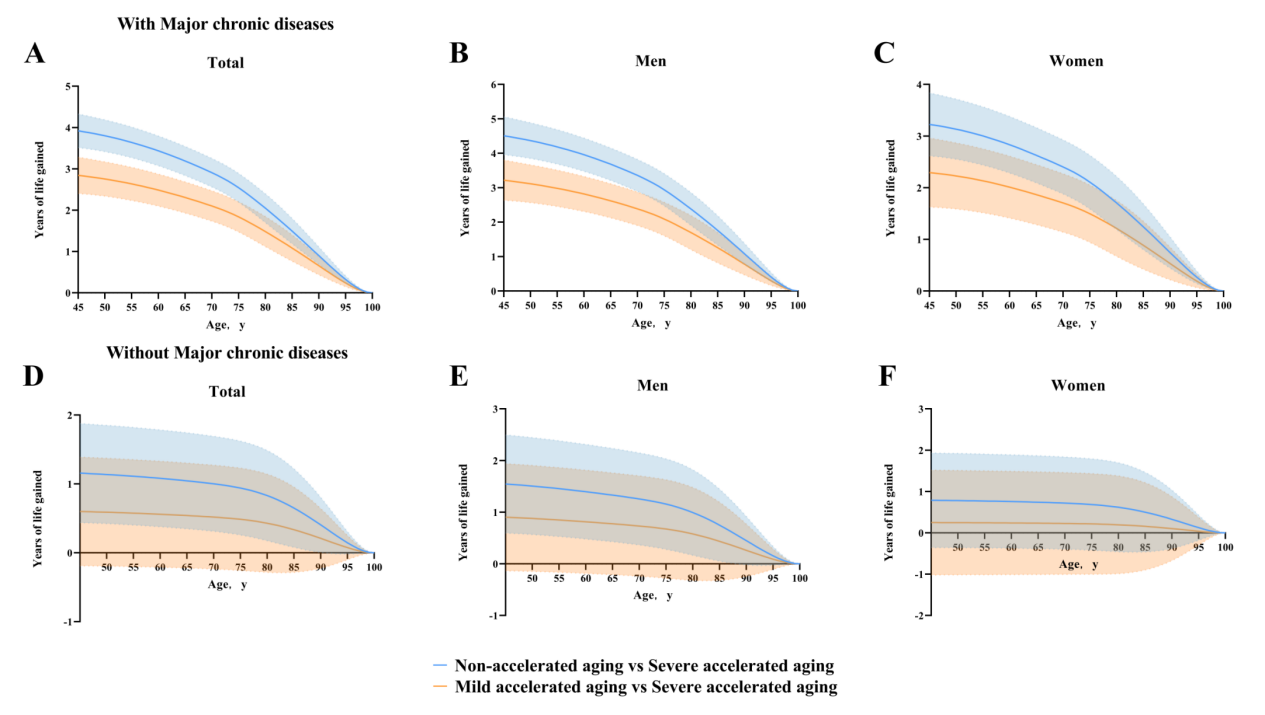


**Figure S7:Association between increased life expectancy at age 45 and different phenotypes of PhenoAgeAccel in participants with and without major chronic diseases from UK Biobank after adding some covariates for control (n=353619).**

A, B, C:with major chronic diseases

D, E, F:without major chronic diseases

The Royston–Parmar proportion-hazards survival model adjusted for gender (male, female), BMI (underweight and normal/overweight and obese), smoking status (current/former and never smoked), employment status (In paid employment or self-employed/Not in paid), walking speed (normal speed and fast walking/slow walking), and sleep duration (≤6h/≥7h) for UK Biobank..

**
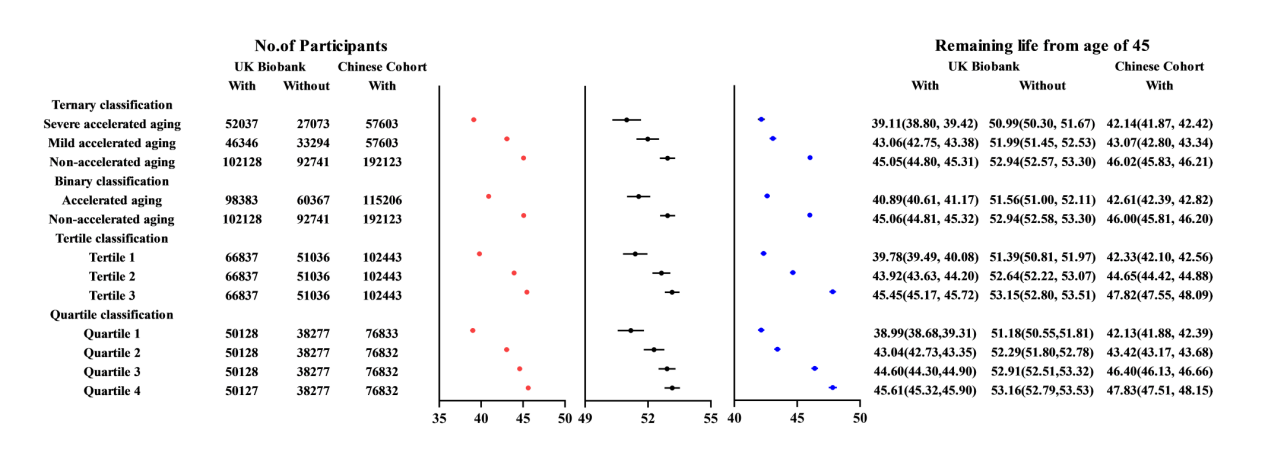
Figure S8: Estimated life expectancy at age 45 for participants with and without major chronic diseases from UK Biobank and participants with major chronic diseases from Chinese Cohort in different aging subgroups.**


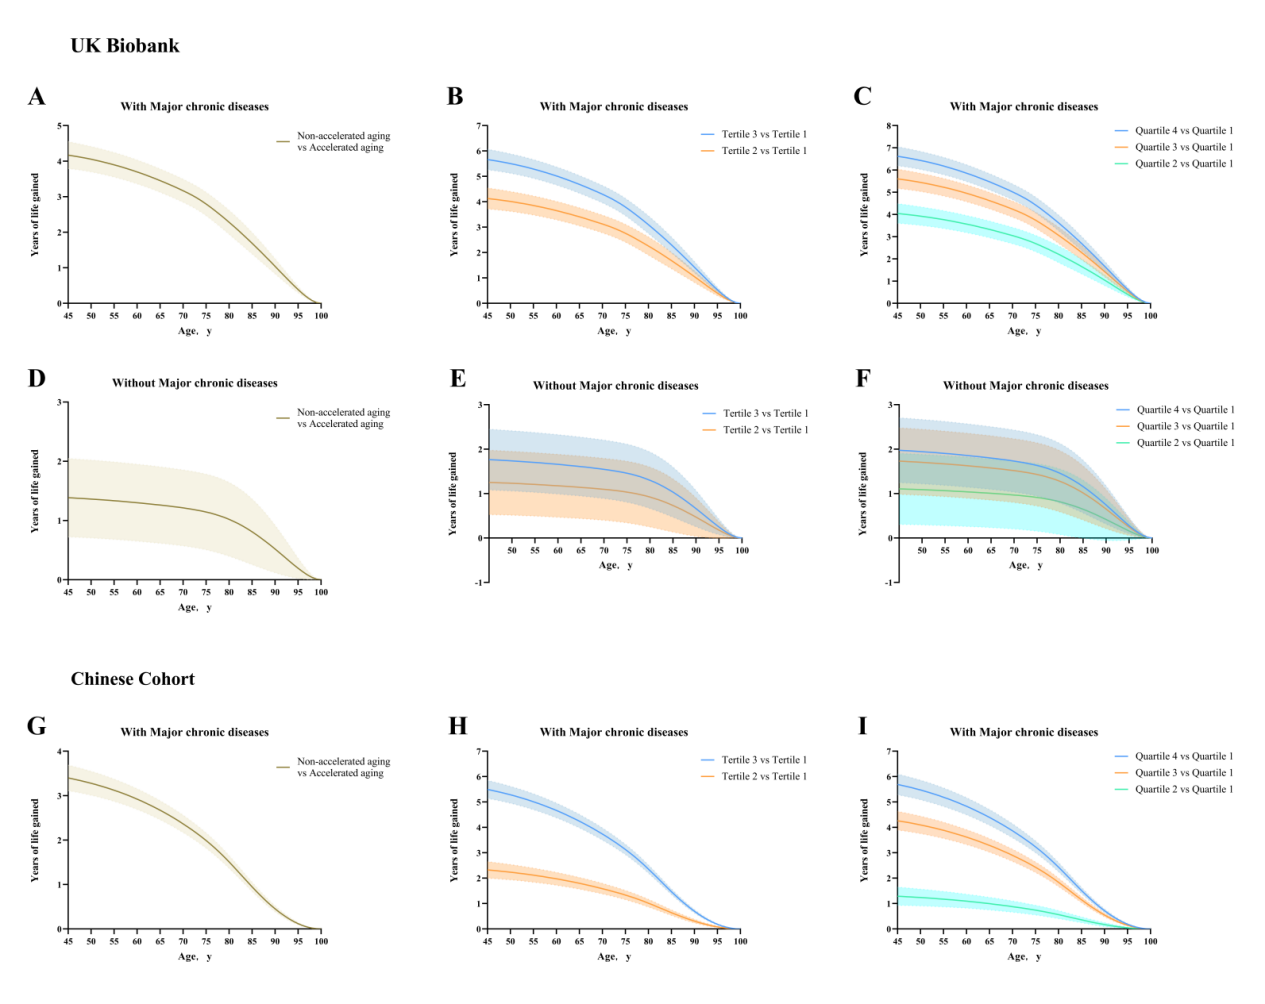


**Figure S9: Association between prolonged life expectancy at age 45 years and different PhenoAgeAccel phenotypes in participants with and without major chronic diseases in different PhenoAgeAccel classification.**

A, D, G:Binary classification

B, E, H: Tertile classification

C, F, I:Quartile classification


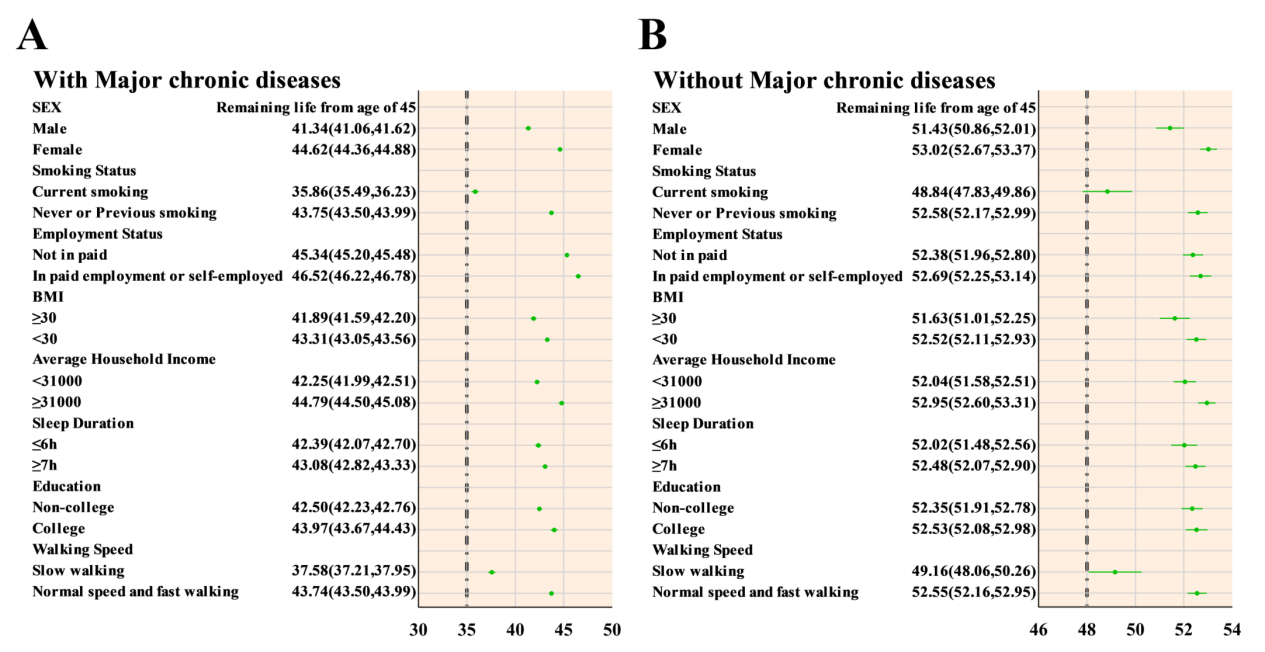
**Figure S10: The estimates of life expectancy at age 45 by sex, smoking status, employment status, BMI, average household income, sleep duration, education and walking speed in UK Biobank.**


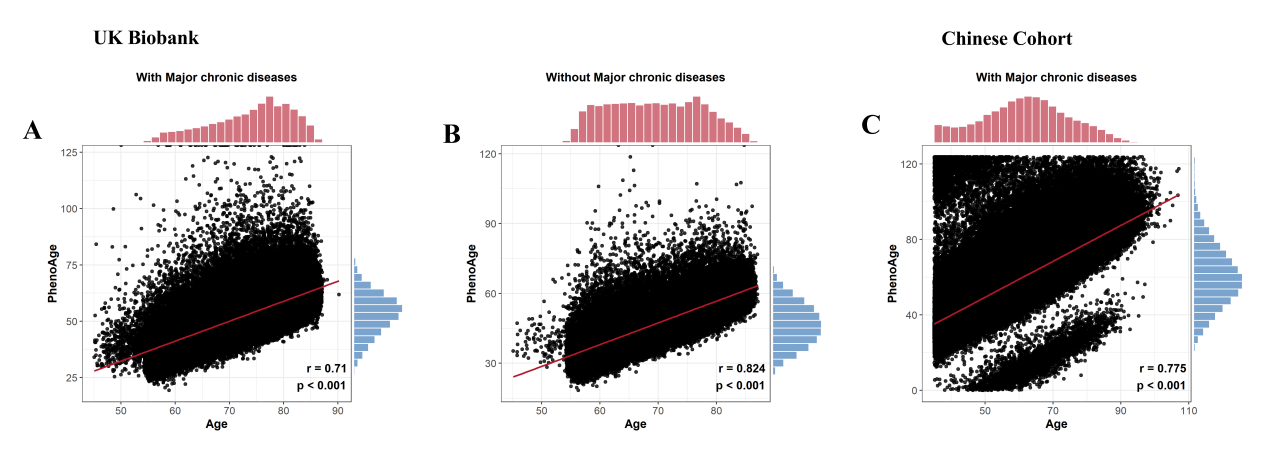


**Figure S11: Trends in PhenoAge as a function of chronological age in UK Biobank (participants with and without major chronic diseases) and Chinese Cohort (participants with major chronic diseases).**

The red line depicts the expected PhenoAge for each chronological age, with points above the line depicting people who were phenotypically older than expected, and points below the line depicting those who were phenotypically younger than expected.

A: With major chronic diseases (UK Biobank)

B: Without major chronic diseases (UK Biobank)

C: With major chronic diseases (Chinese Cohort)


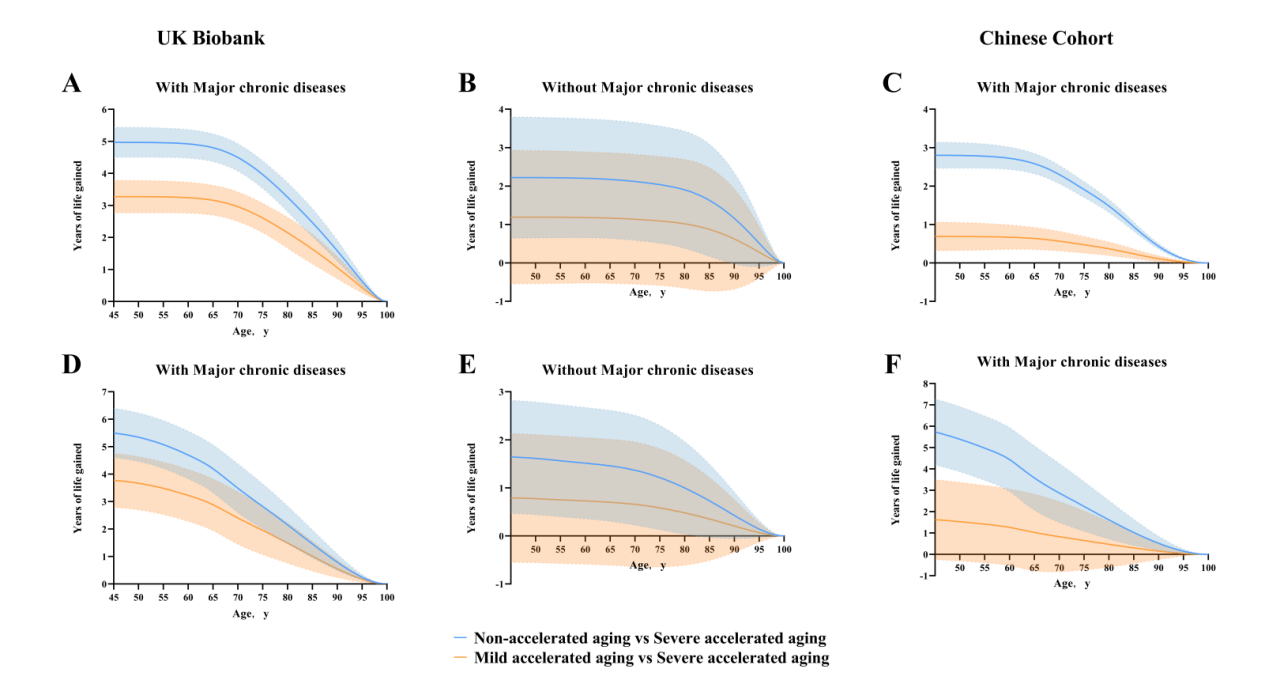


**Figure S12: Association between increased life expectancy at age 45 years and different PhenoAgeAccel phenotypes in participants with and without major chronic diseases from UK Biobank and participants with major chronic diseases from Chinese Cohort, across different age subgroups.**

A, B, C Chronological age ≥ 60

D, E, F:Chronological age < 60


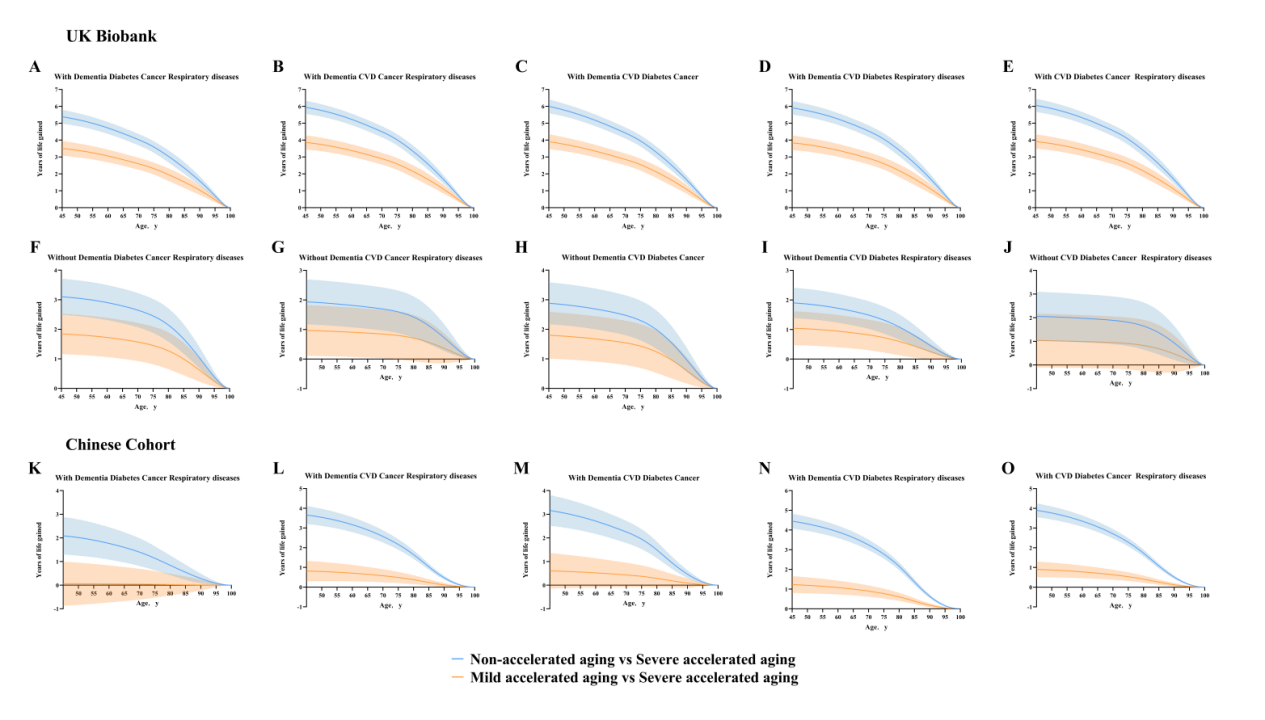


**Figure S13: Association between increased life expectancy at age 45 years and different PhenoAgeAccel phenotypes in participants with and without major chronic diseases (excluding one disease) from UK Biobank and participants with major chronic diseases from Chinese Cohort.**

**
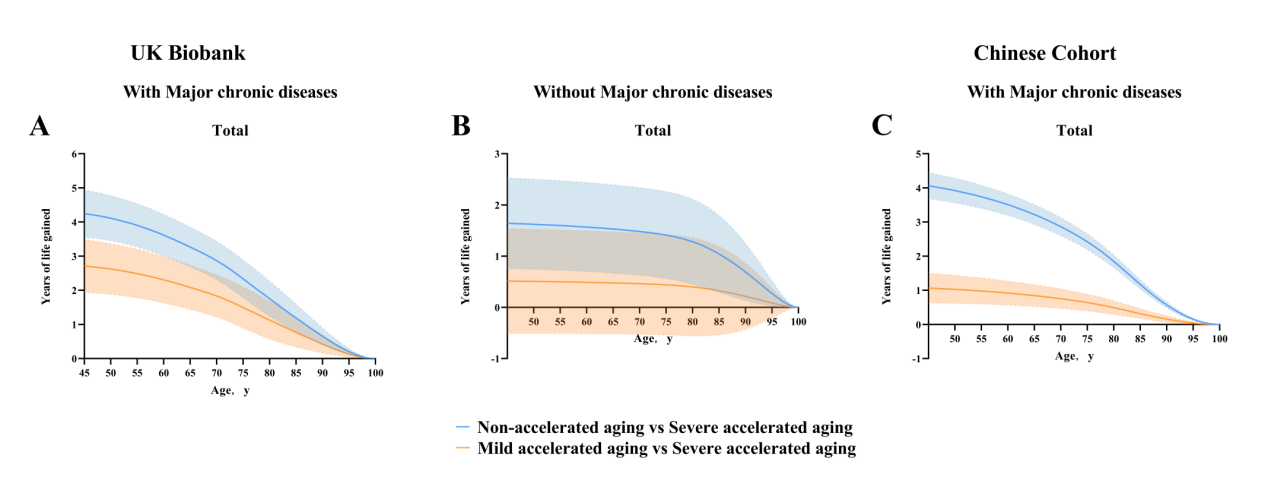
**

**Figure S14: Association between increased life expectancy at age 45 years and different PhenoAgeAccel phenotypes, after removal of participants with hypertension, cerebrovascular disease, and mental disorders at baseline, in participants with and without major chronic diseases from UK Biobank(n=207262) and participants with major chronic diseases from Chinese Cohort(n=231551).**

A: With major chronic diseases (UK Biobank)

B: Without major chronic diseases (UK Biobank)

C: With major chronic diseases (Chinese Cohort)

**
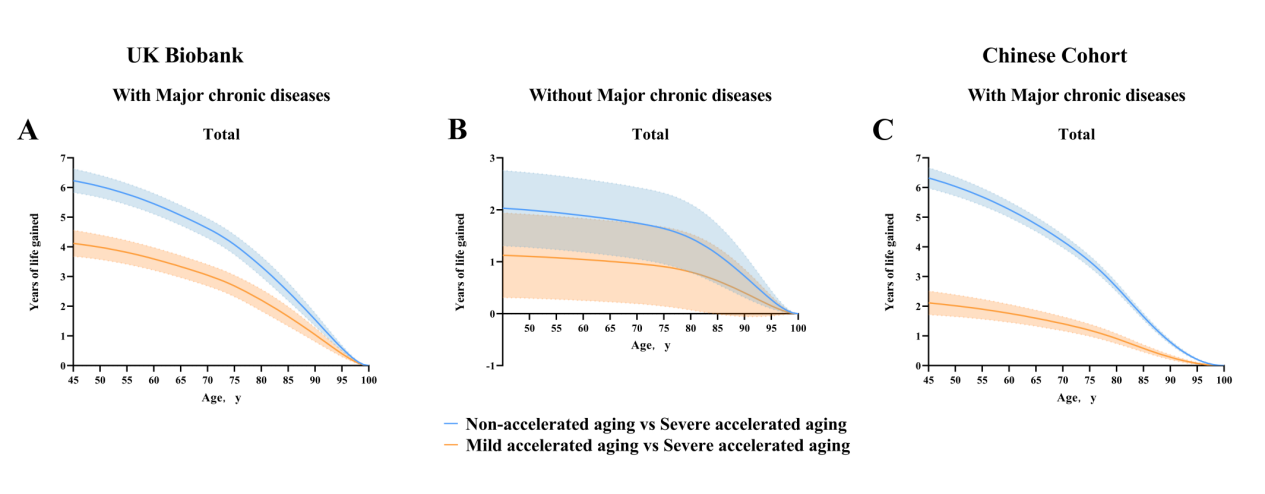
**

**Figure S15: Association between increased life expectancy at age 45 years and different PhenoAgeAccel phenotypes, after excluding participants who died in the first year of follow-up, in participants with and without major chronic diseases from UK Biobank(n=354672) and participants with major chronic diseases from Chinese Cohort(n=332895).**

A: With major chronic diseases (UK Biobank)

B: Without major chronic diseases (UK Biobank)

C: With major chronic diseases (Chinese Cohort)

**
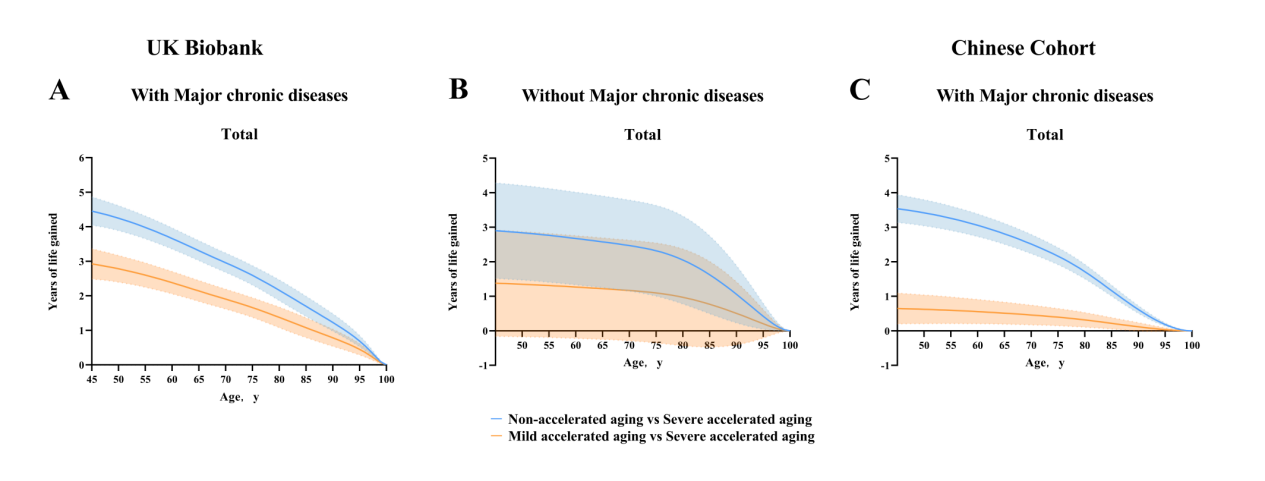
**

**Figure S16:Association between increased life expectancy at age 45 and different phenotypes of PhenoAgeAccel, after shortening the follow-up period to 15.0 years (UK Biobank, n=153806) and 10.0 years (Chinese Cohort, n=248884), in participants with and without major chronic diseases from UK Biobank and participants with major chronic diseases from Chinese Cohort.**

A: With major chronic diseases (UK Biobank)

B: Without major chronic diseases (UK Biobank)

C: With major chronic diseases (Chinese Cohort)

**
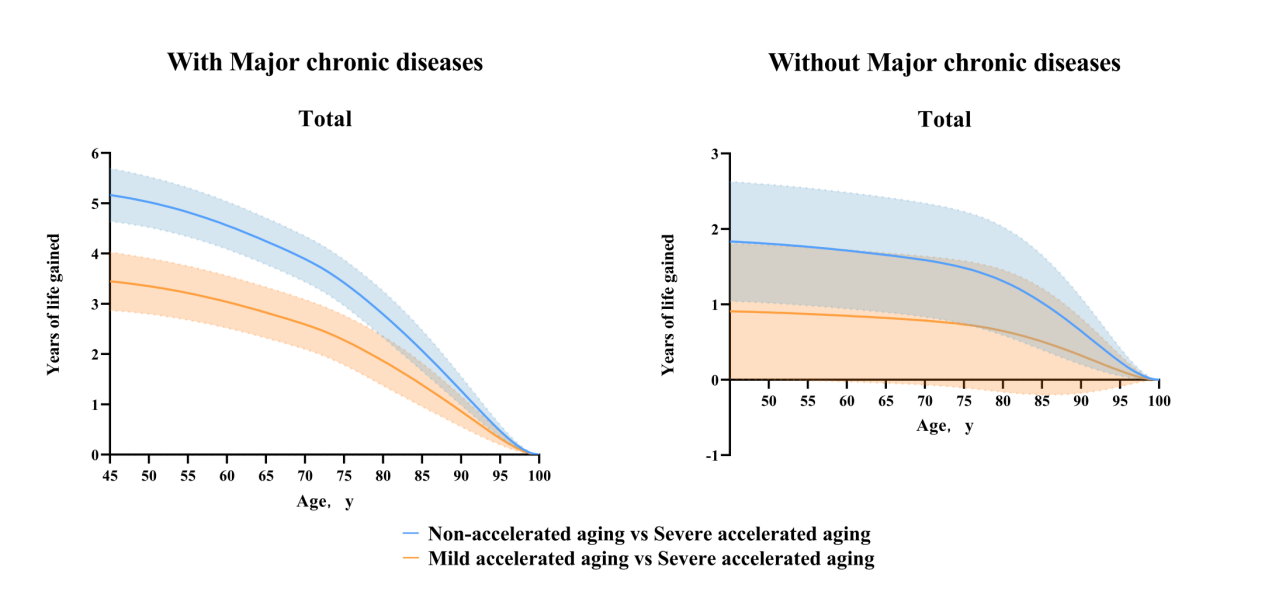
**

**Figure S17:Association between increased life expectancy at age 45 years and different PhenoAgeAccel phenotypes in participants with and without major chronic diseases from UK Biobank after removal of missing covariate data(n=255816).**


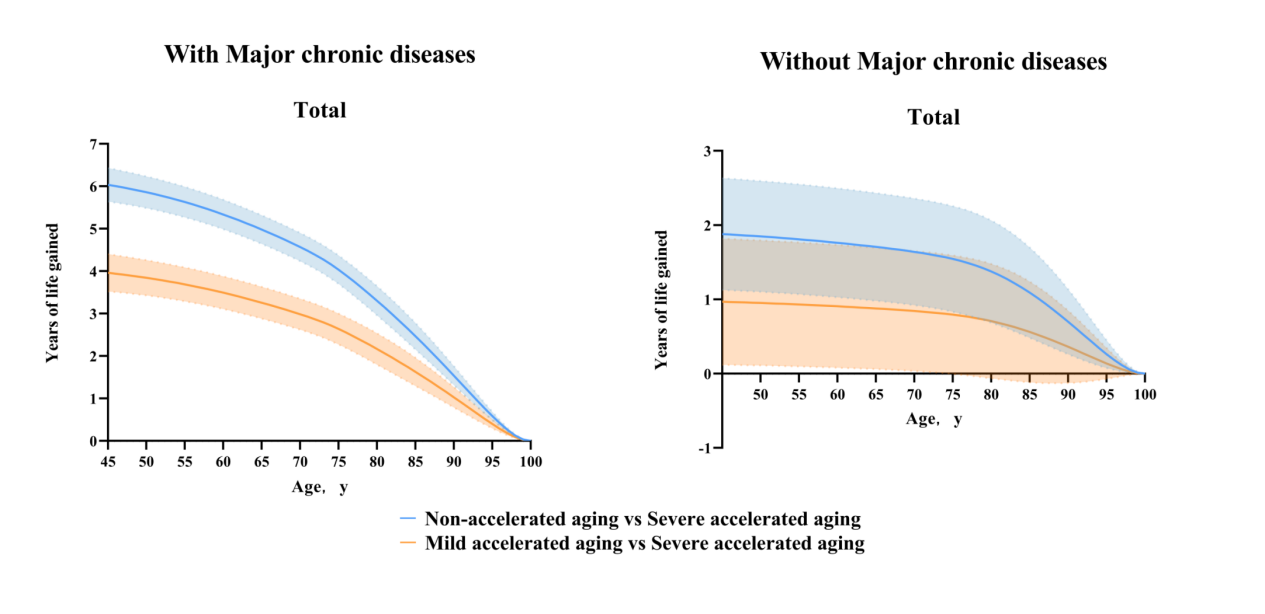


**Figure S18: Association between increased life expectancy at age 45 years and different PhenoAgeAccel phenotypes in participants with and without major chronic diseases from UK Biobank after filling in missing aging data (n=369781).**


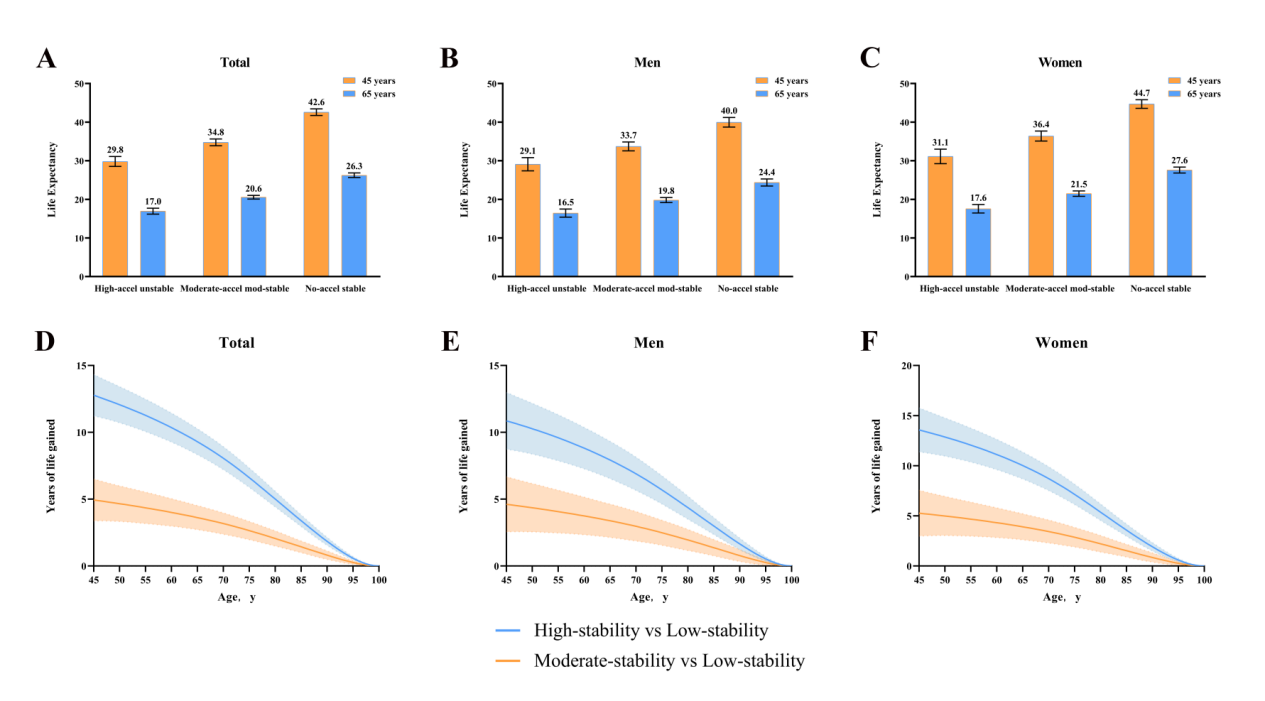


**Figure S19 : Life expectancy at 45 and 65 years of age across distinct k-means clusters of PhenoAgeAccel trajectories, as well as the association between years of life gained in life expectancy at 45 years and these different k-means clusters, in participants from the Chinese Cohort included in the focused analysis (n=16991).**

A-C: Bar plots illustrating life expectancy at 45 years and 65 years across three PhenoAgeAccel trajectory patterns (high-stability, moderate-stability, low-stability) in total participants (A), men (B), and women (C).

D-F: Curves depicting years of life gained across ages (45–100 years) for the comparisons of high-stability vs low-stability and moderate-stability vs low-stability in total participants (D), men (E), and women (F).


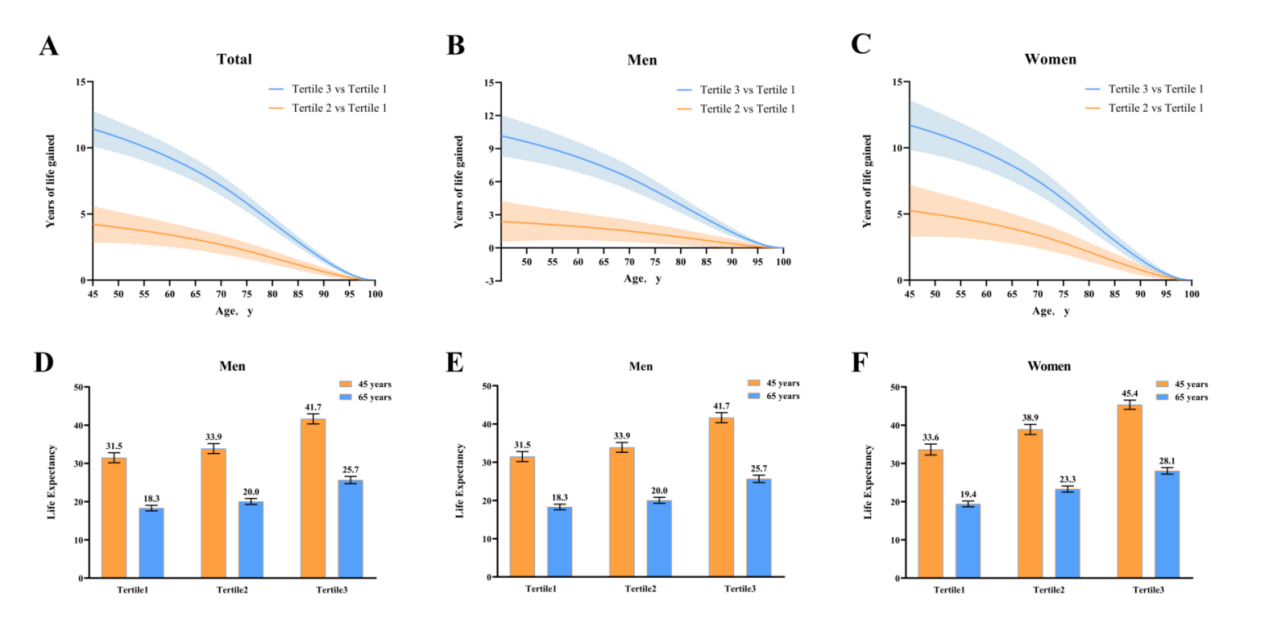


**Figure S20 :Life expectancy at 45 and 65 years of age across tertile groups of cuPhenoAgeAccel, as well as the association between years of life gained in life expectancy at 45 years and these cuPhenoAgeAccel tertile groups, in participants from the Chinese Cohort included in the focused analysis (n=16,991).**

A-C: Curves depicting years of life gained across ages (45–100 years) for the comparisons of cuPhenoAgeAccel Tertile 1 (lowest cuPhenoAgeAccel) vs. Tertile 3 (highest cuPhenoAgeAccel) and Tertile 2 (moderate cuPhenoAgeAccel) vs. Tertile 3 (highest cuPhenoAgeAccel) in total participants (A), men (B), and women (C).

D-F: Bar plots illustrating life expectancy at 45 years and 65 years across three cuPhenoAgeAccel tertile groups (Tertile 1: lowest; Tertile 2: moderate; Tertile 3: highest) in total participants (D), men (E), and women (F).


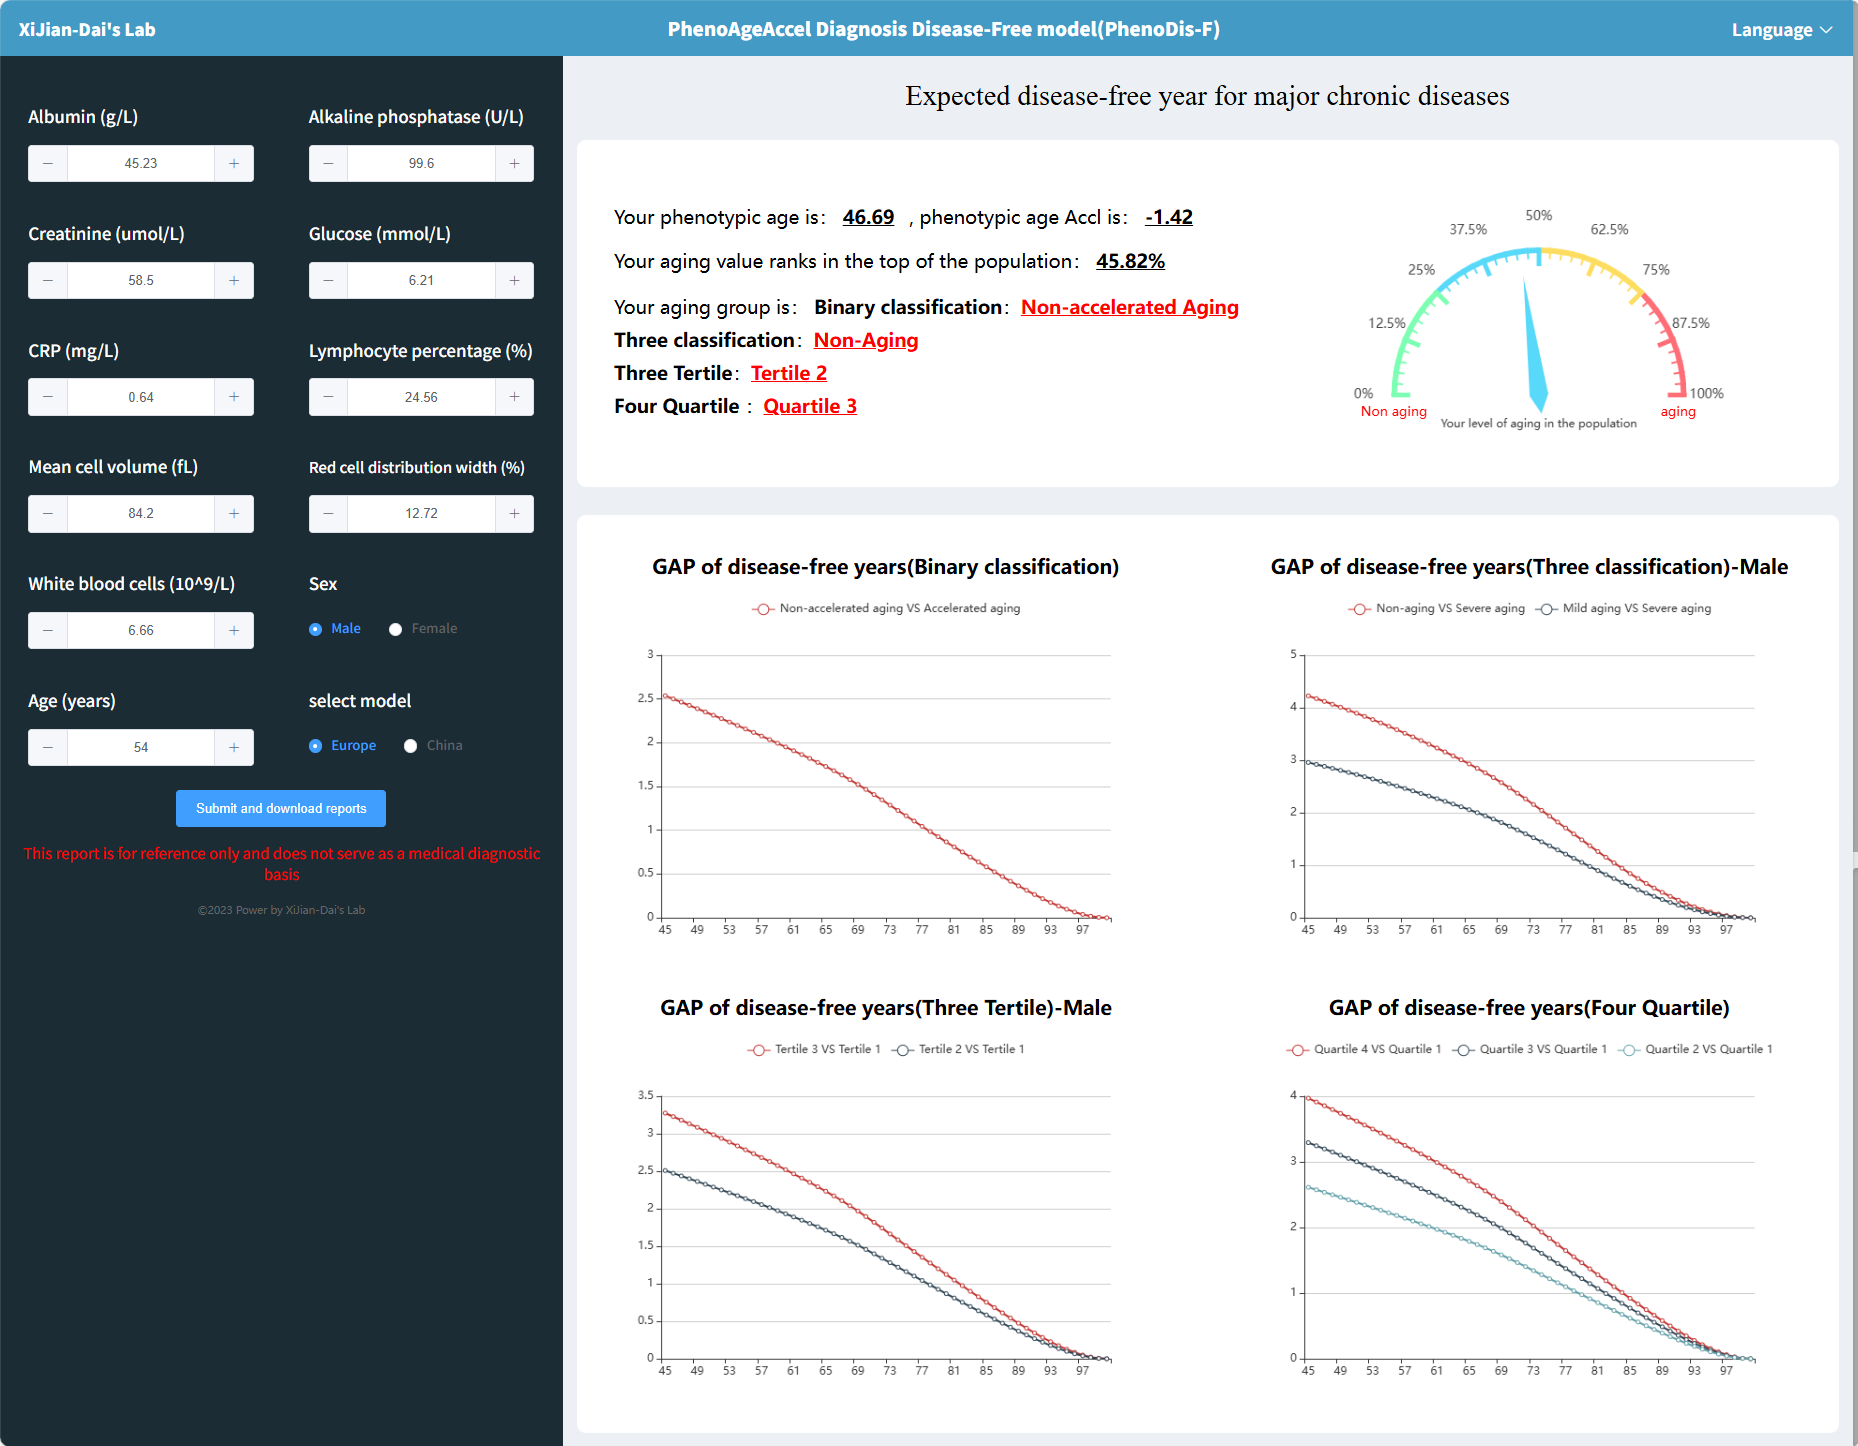


**Figure S21：The webpage interface of the PhenoAgeAccel-mortality-lifespan model.**

The baseline characteristics can be input through the operation bar on the left, and the display area on the right presents the degree of phenotypic aging in the form of a dashboard. The curve graph shows the changes in the expected lifespan gain as people age.


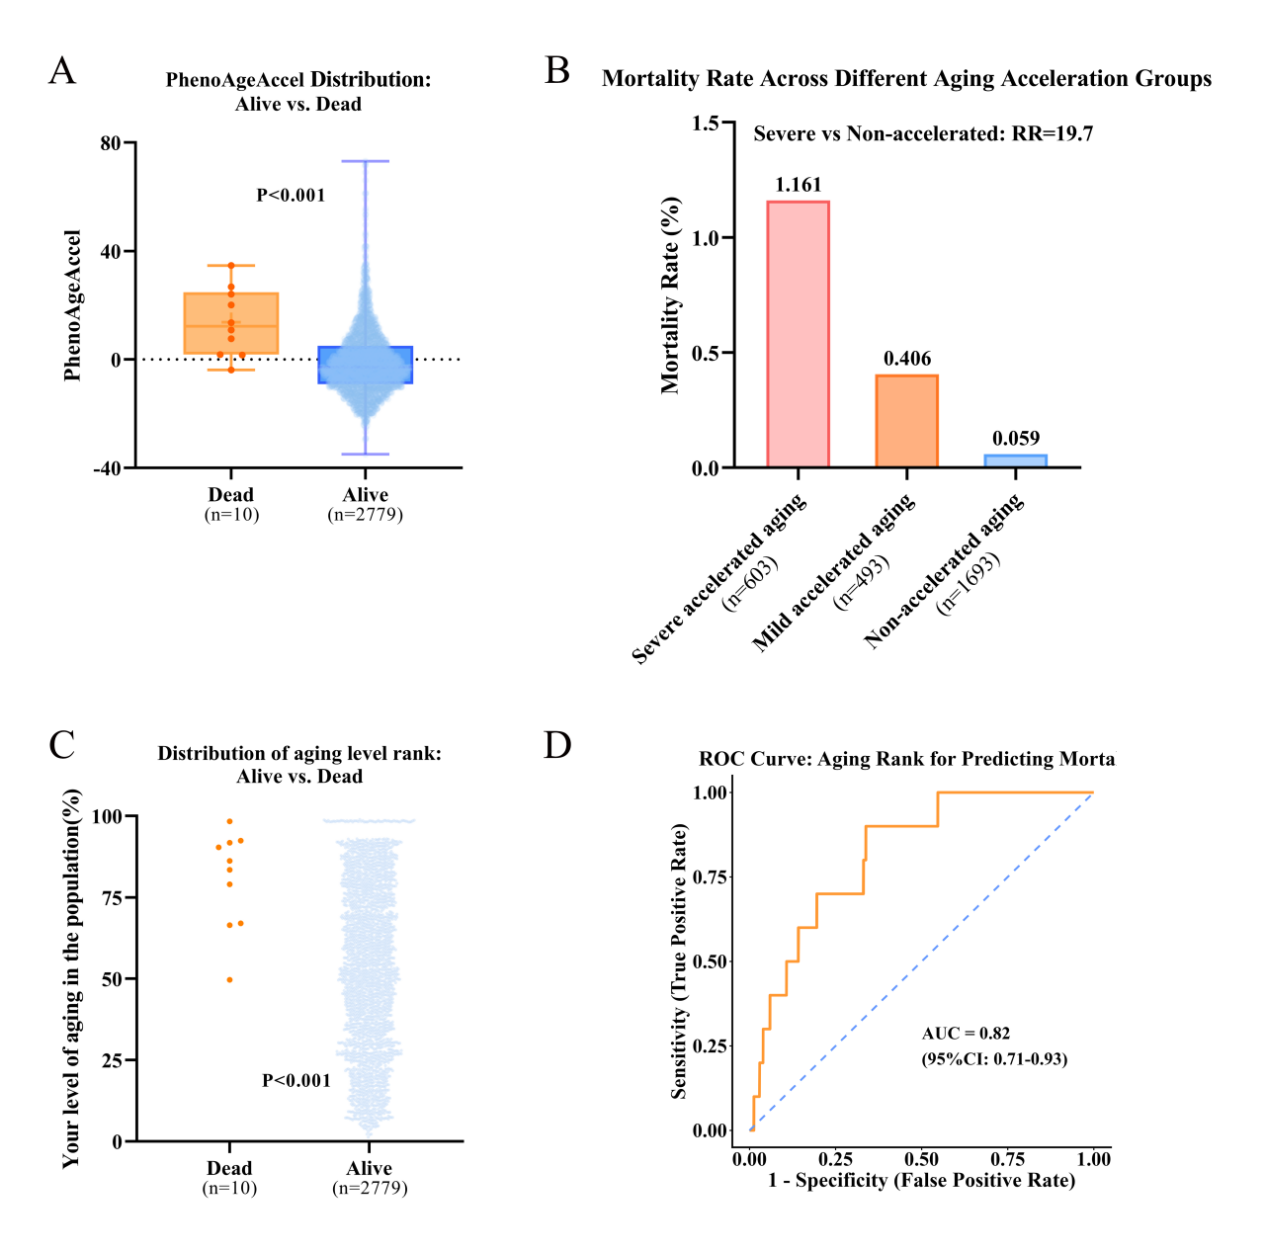


**Figure S22: Clinical performance of the PhenoLife-M platform for mortality risk stratification and prediction.**

(A) Distribution of PhenoAge acceleration (PhenoAgeAccel) in alive and deceased patients. The orange boxplot represents deceased patients (n=10), and the blue violin plot represents alive patients (n=2779). P < 0.001 by Mann-Whitney U test.(B) Mortality rate across different PhenoAge acceleration groups. The red, orange, and blue bars represent severe accelerated aging (n=603), mild accelerated aging (n=493), and non-accelerated aging (n=1693) groups, respectively. The relative risk (RR) of mortality in the severe accelerated group compared to the non-accelerated group was 19.7.(C) Distribution of aging level rank in alive and deceased patients. The orange dots represent deceased patients (n=10), and the blue violin plot represents alive patients (n=2779). P < 0.001 by Mann-Whitney U test.(D) ROC curve of aging level rank for predicting mortality. The orange step curve represents the ROC performance, and the blue dashed line represents the chance line. The area under the curve (AUC) was 0.82 (95% CI: 0.71–0.93).
